# Supplementary material for: Improved method for linear carbon monoxide simulation and source attribution in atmospheric chemistry models illustrated using GEOS-Chem v9
Source: Copernicus journal article supplement (doi:10.5194/gmd-10-4129-2017), 2017-11-15

Red: old\_tagCO (2010); Purple: new\_tagCO (2010); Blue: full\_chemistry (2010)

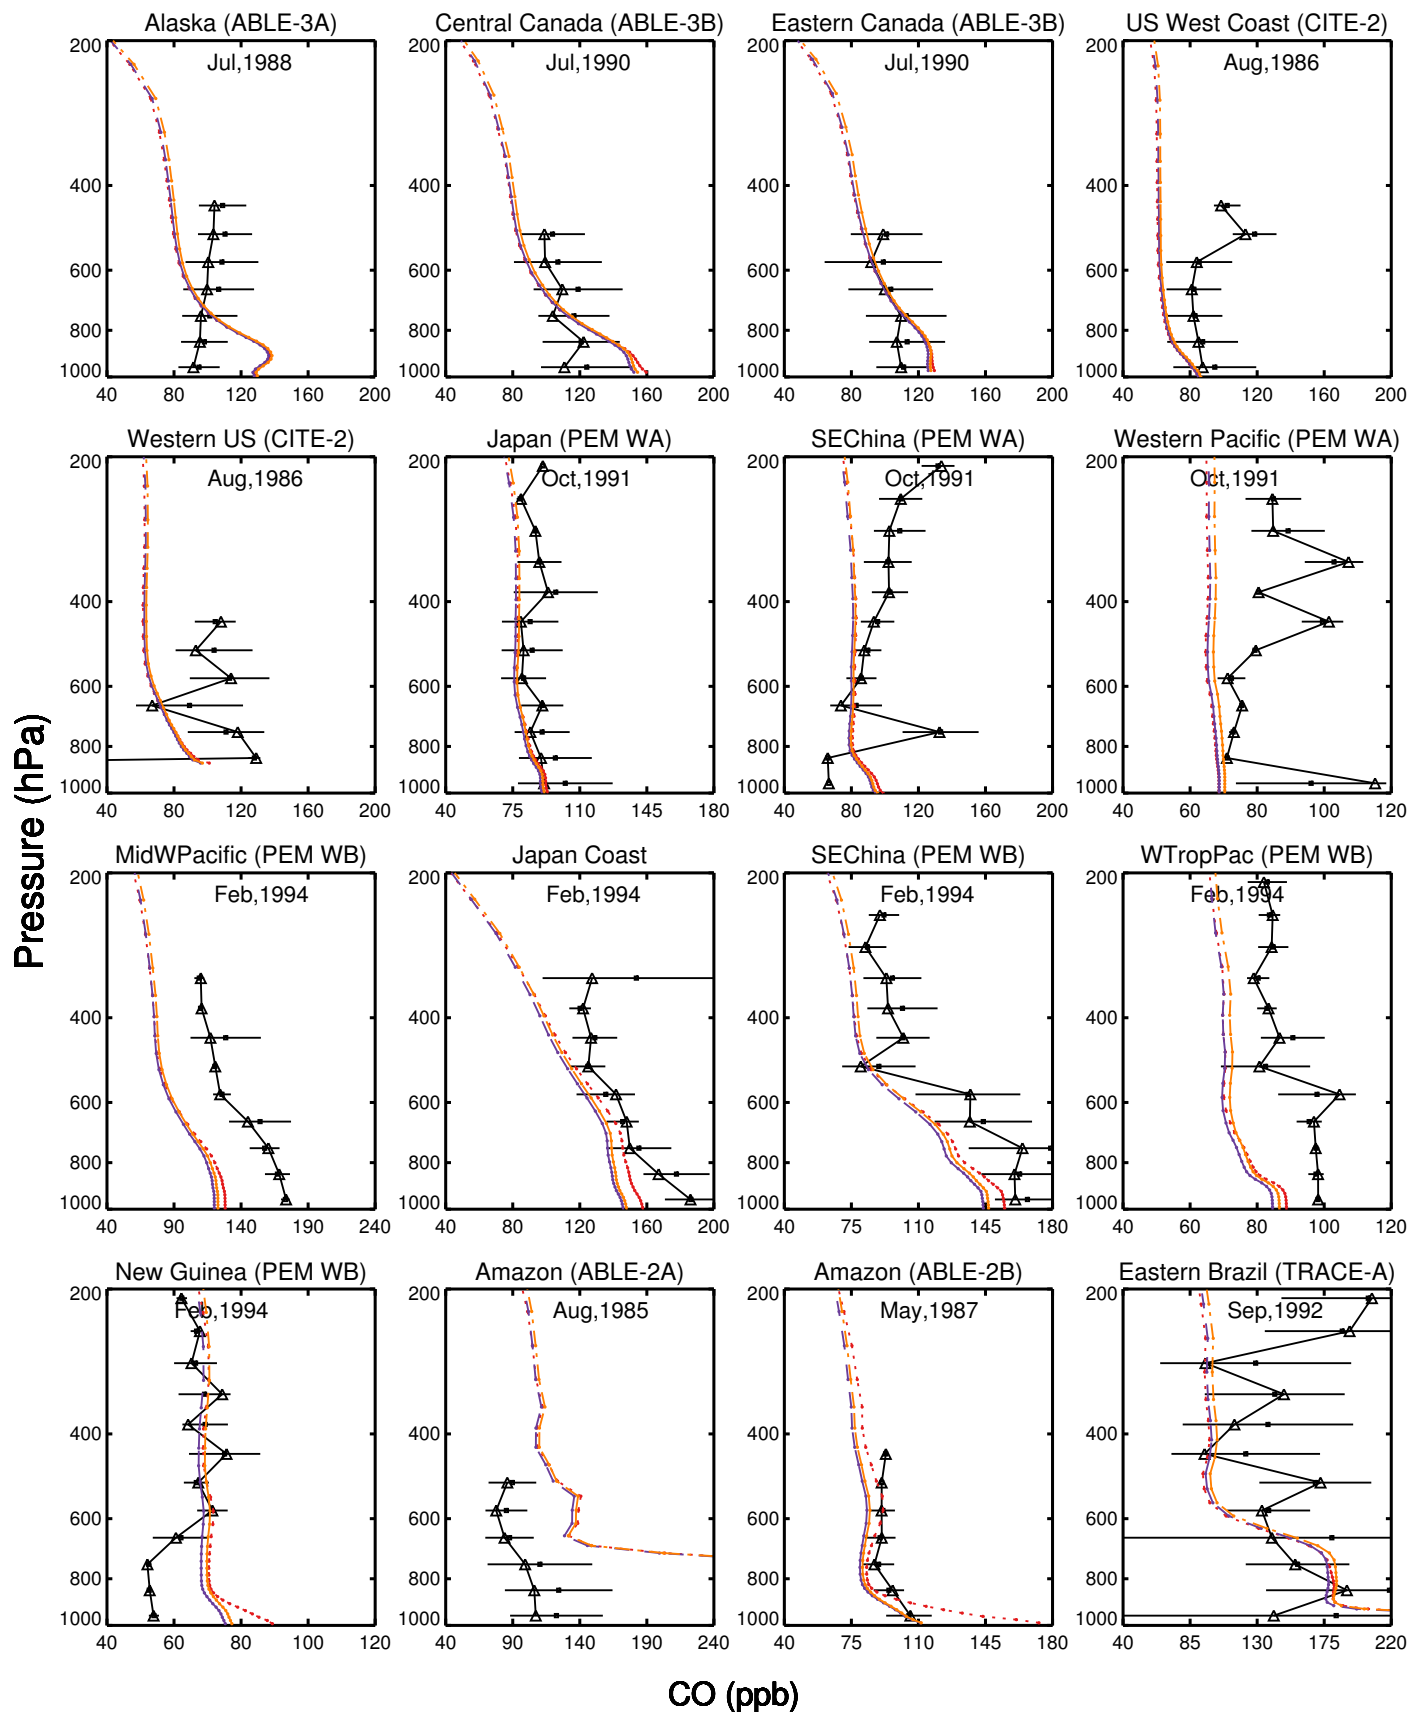

Red: old\_tagCO (2010); Purple: new\_tagCO (2010); Blue: full\_chemistry (2010)

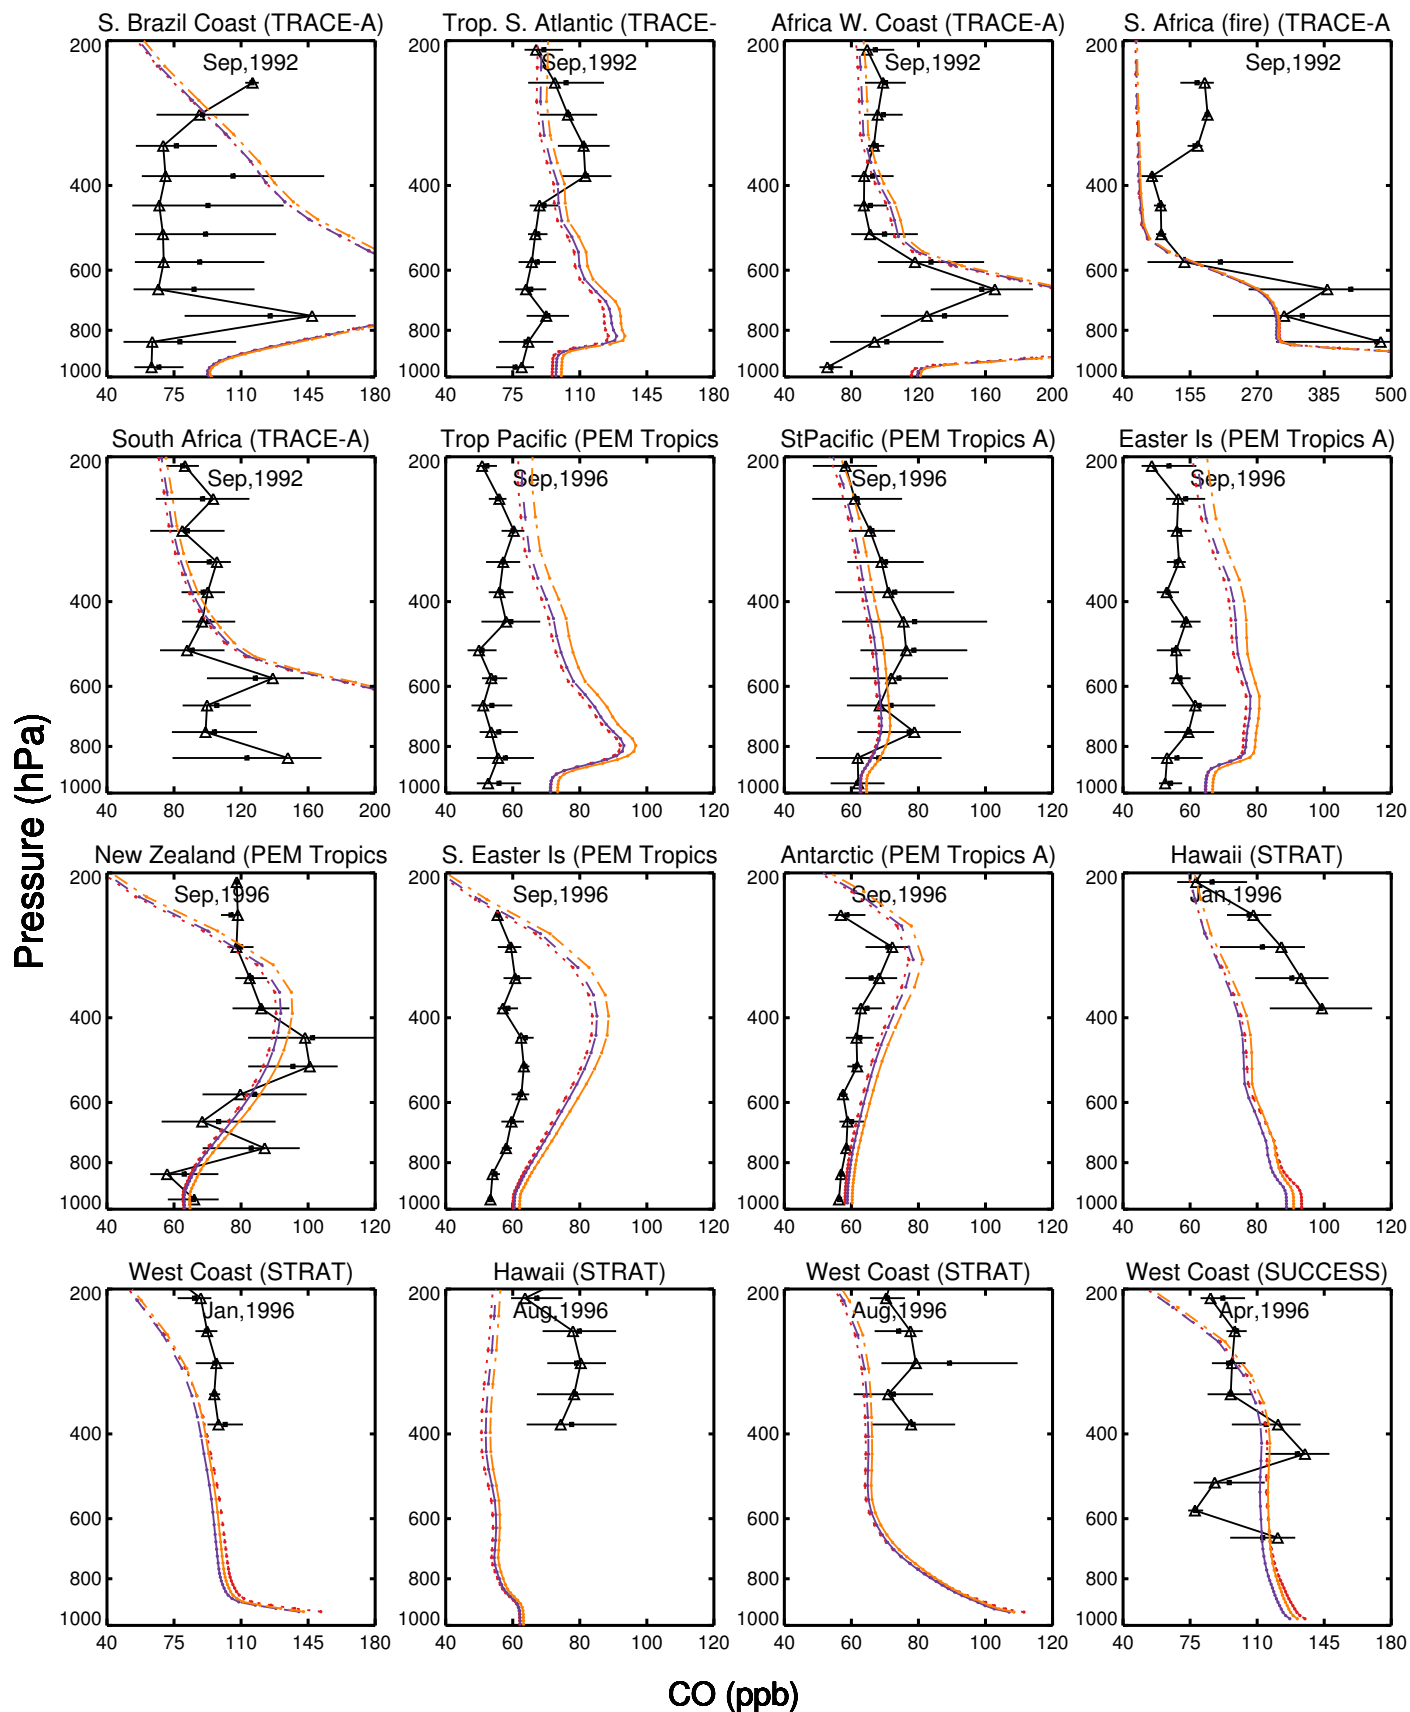

Red: old\_tagCO (2010); Purple: new\_tagCO (2010); Blue: full\_chemistry (2010)

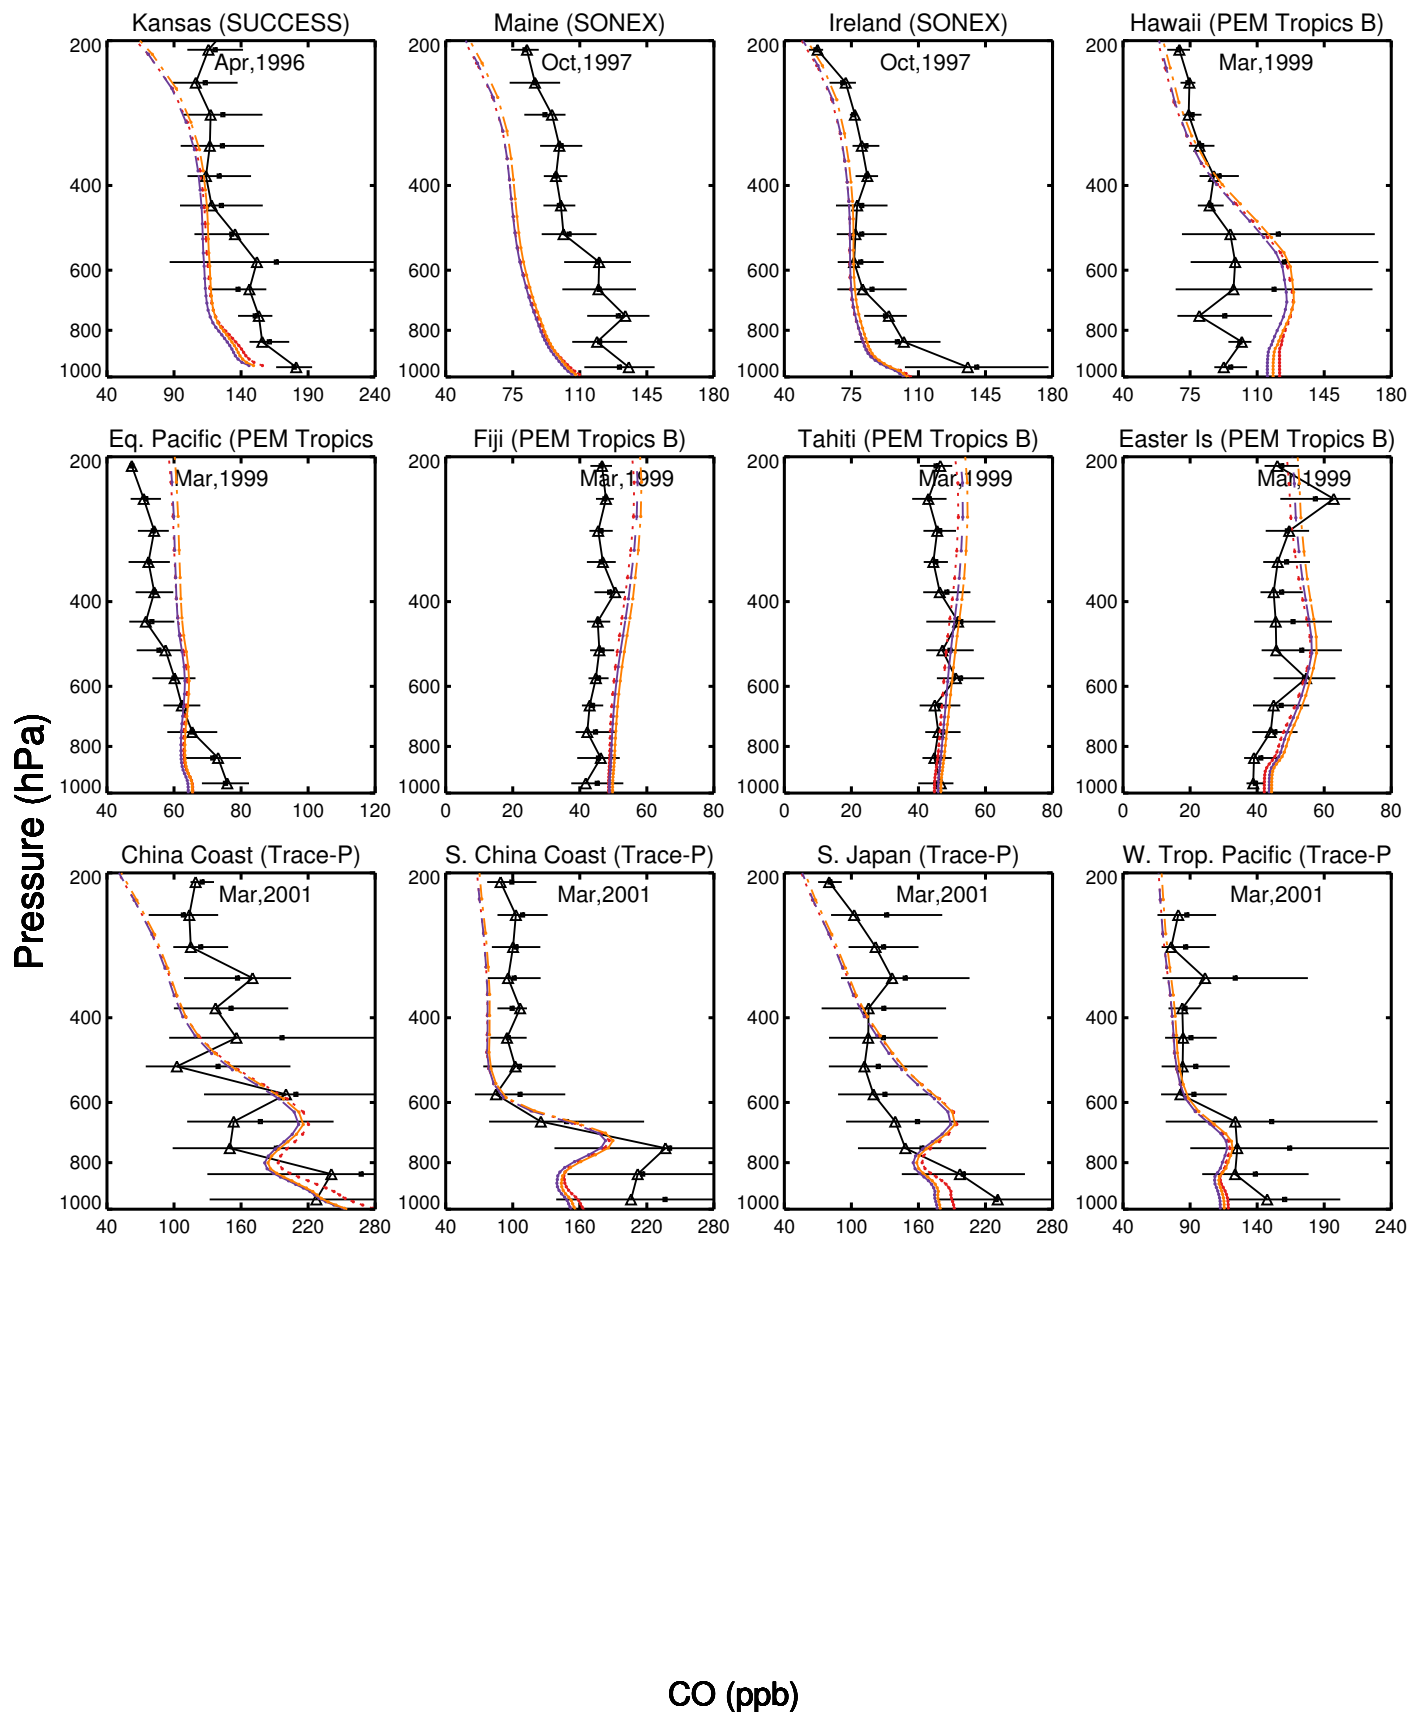

Red: old\_tagCO (2010); Purple: new\_tagCO (2010); Blue: full\_chemistry (2010)

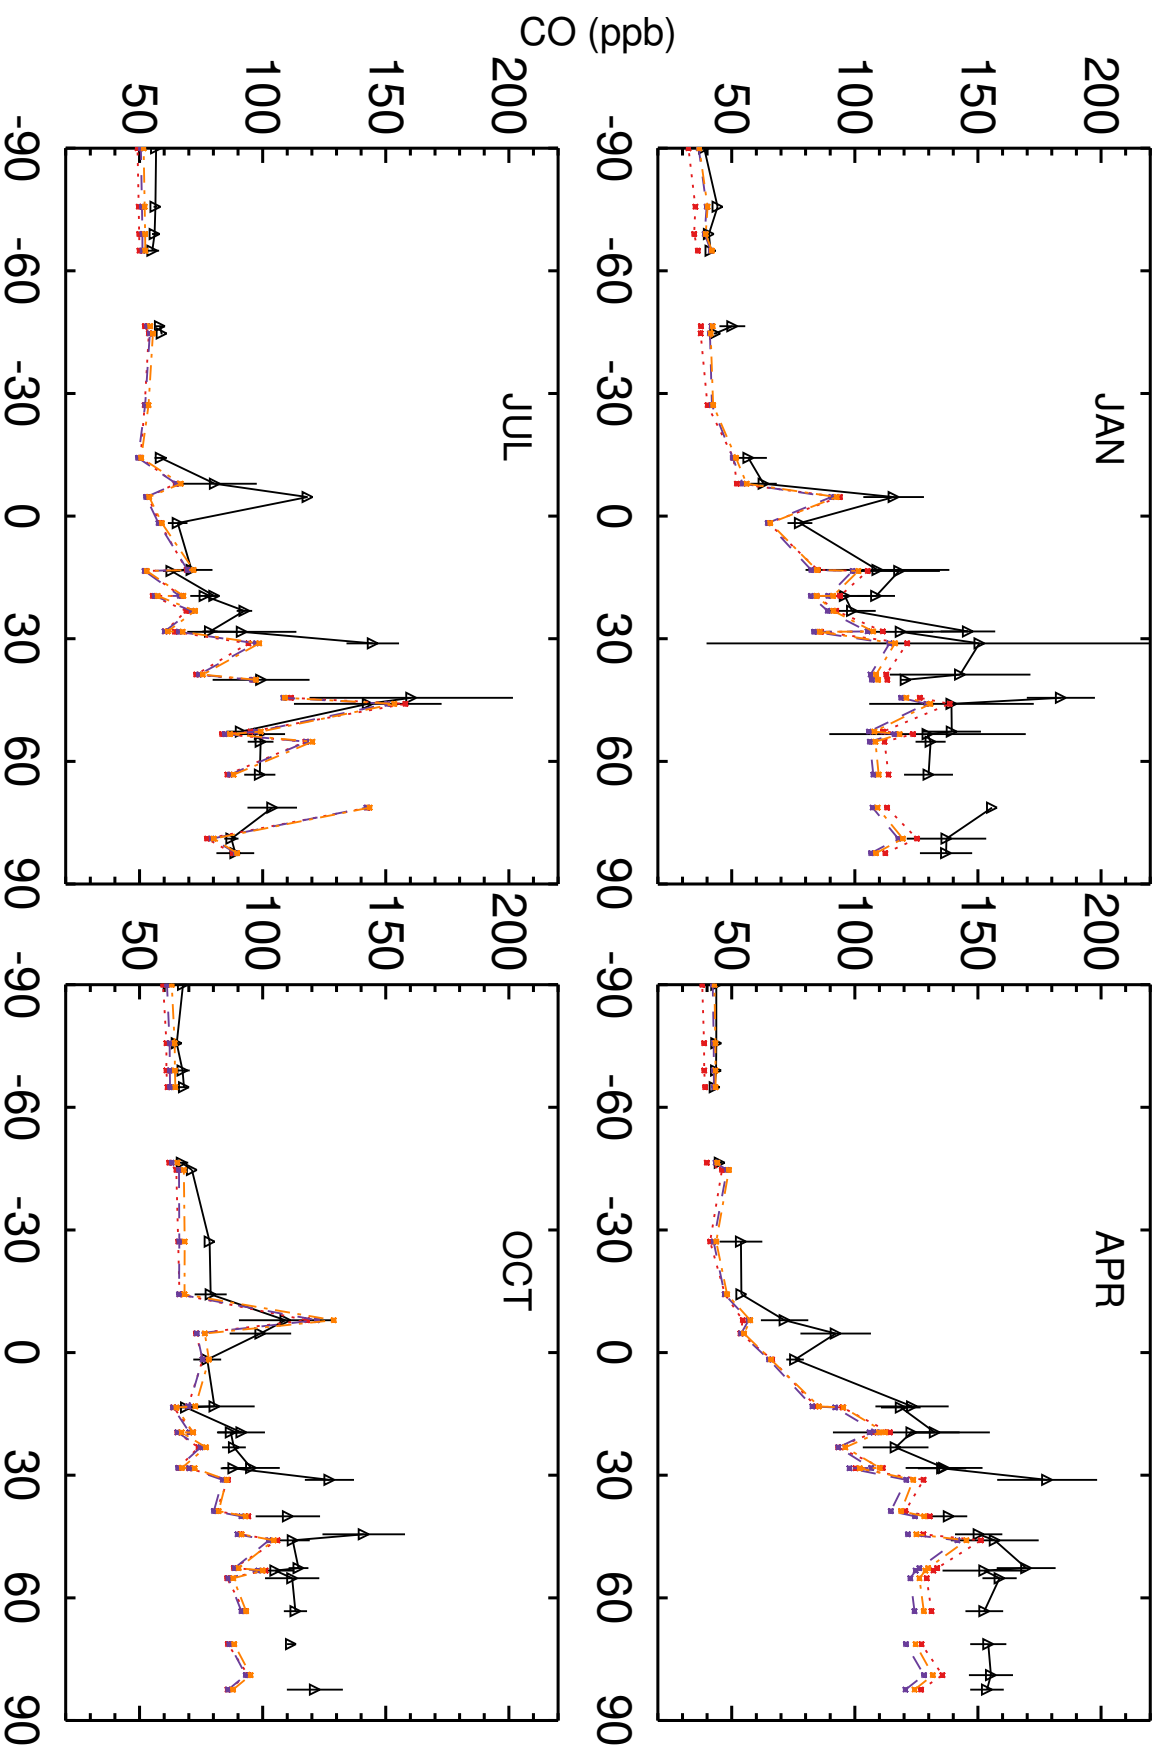

Red: old\_tagCO (2010); Purple: new\_tagCO (2010); Blue: full\_chemistry (2010)

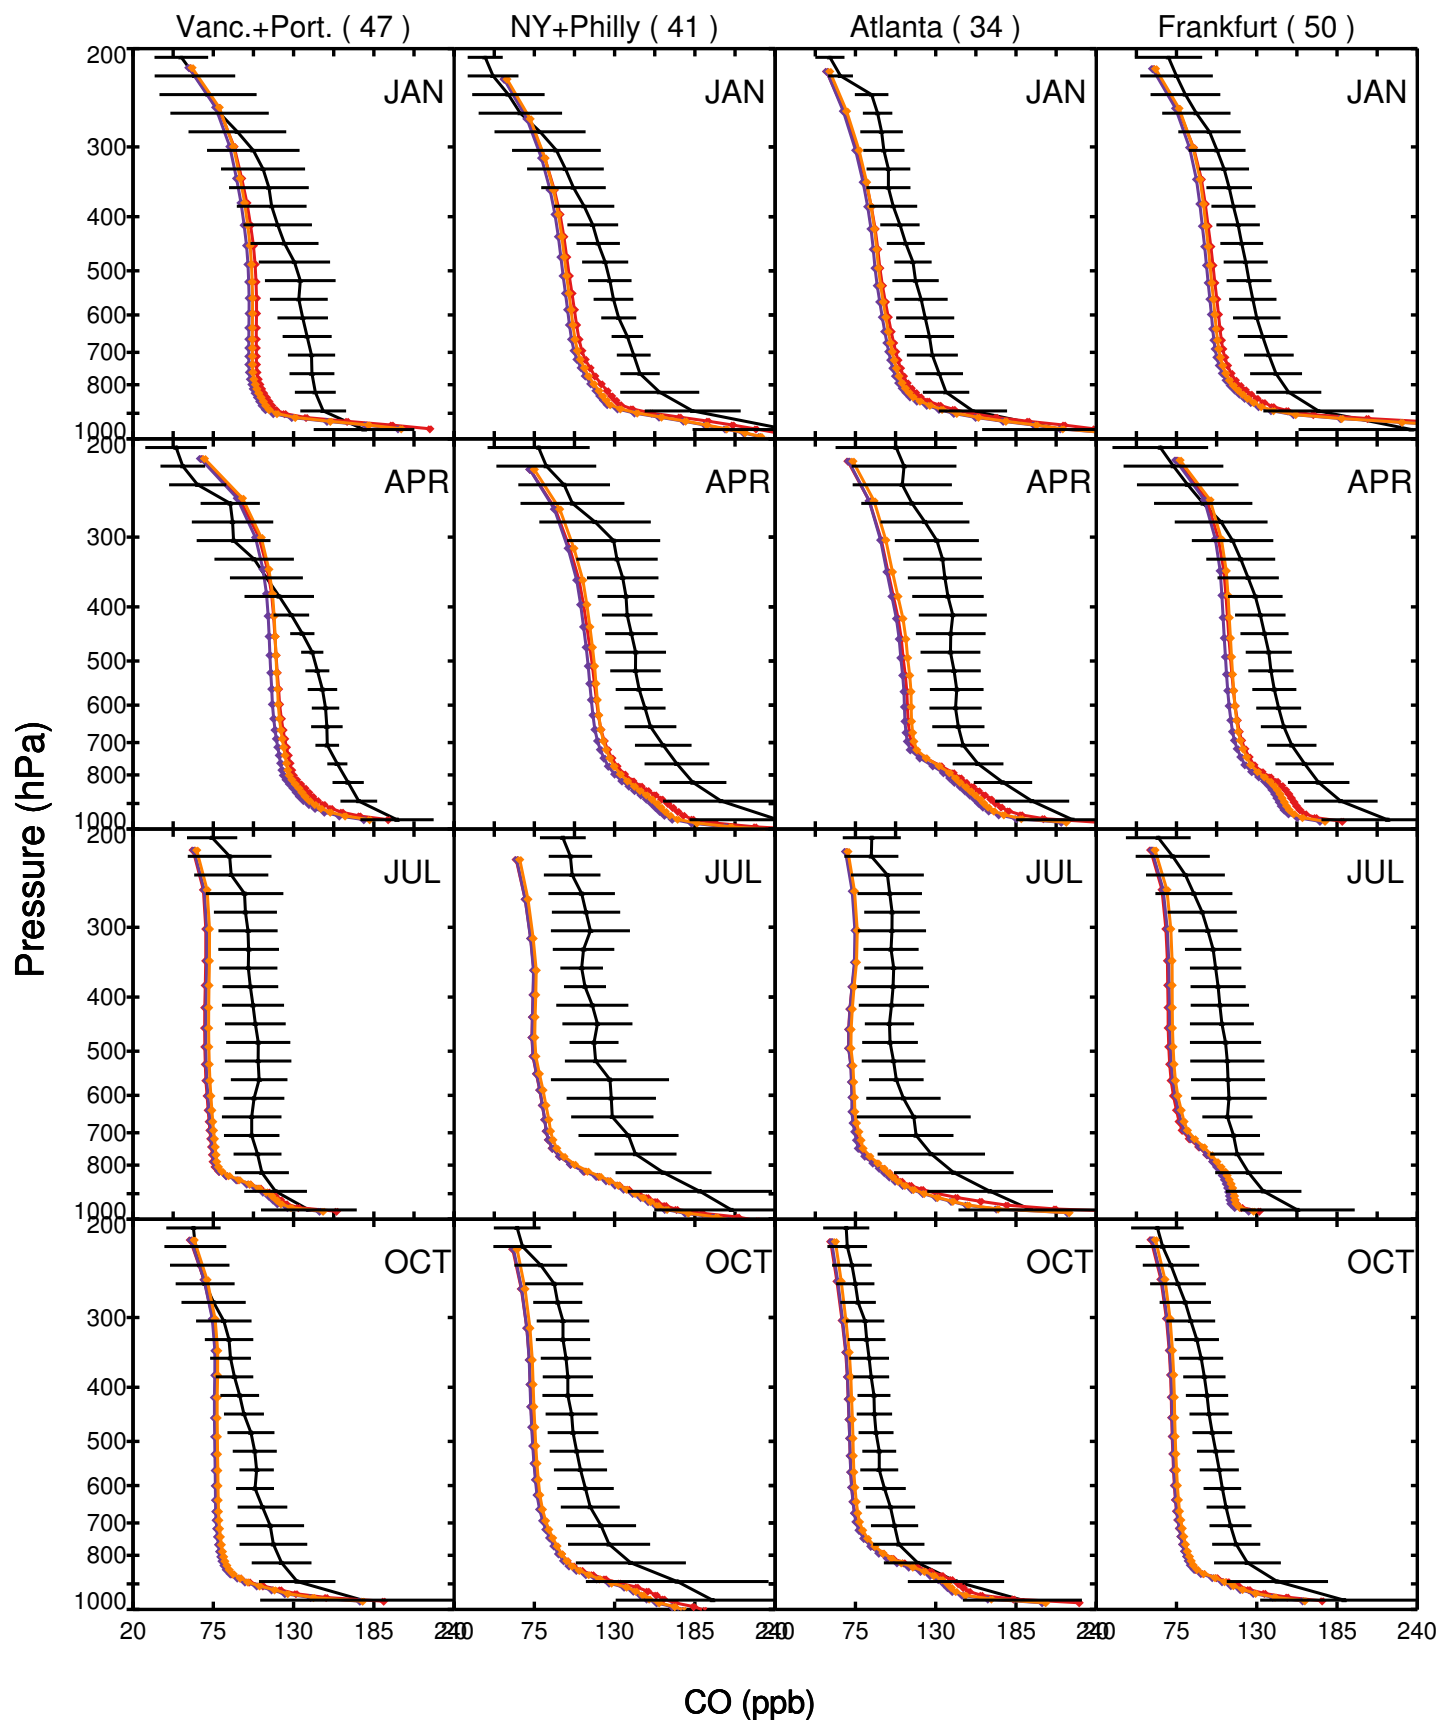

Red: old\_tagCO (2010); Purple: new\_tagCO (2010); Blue: full\_chemistry (2010)

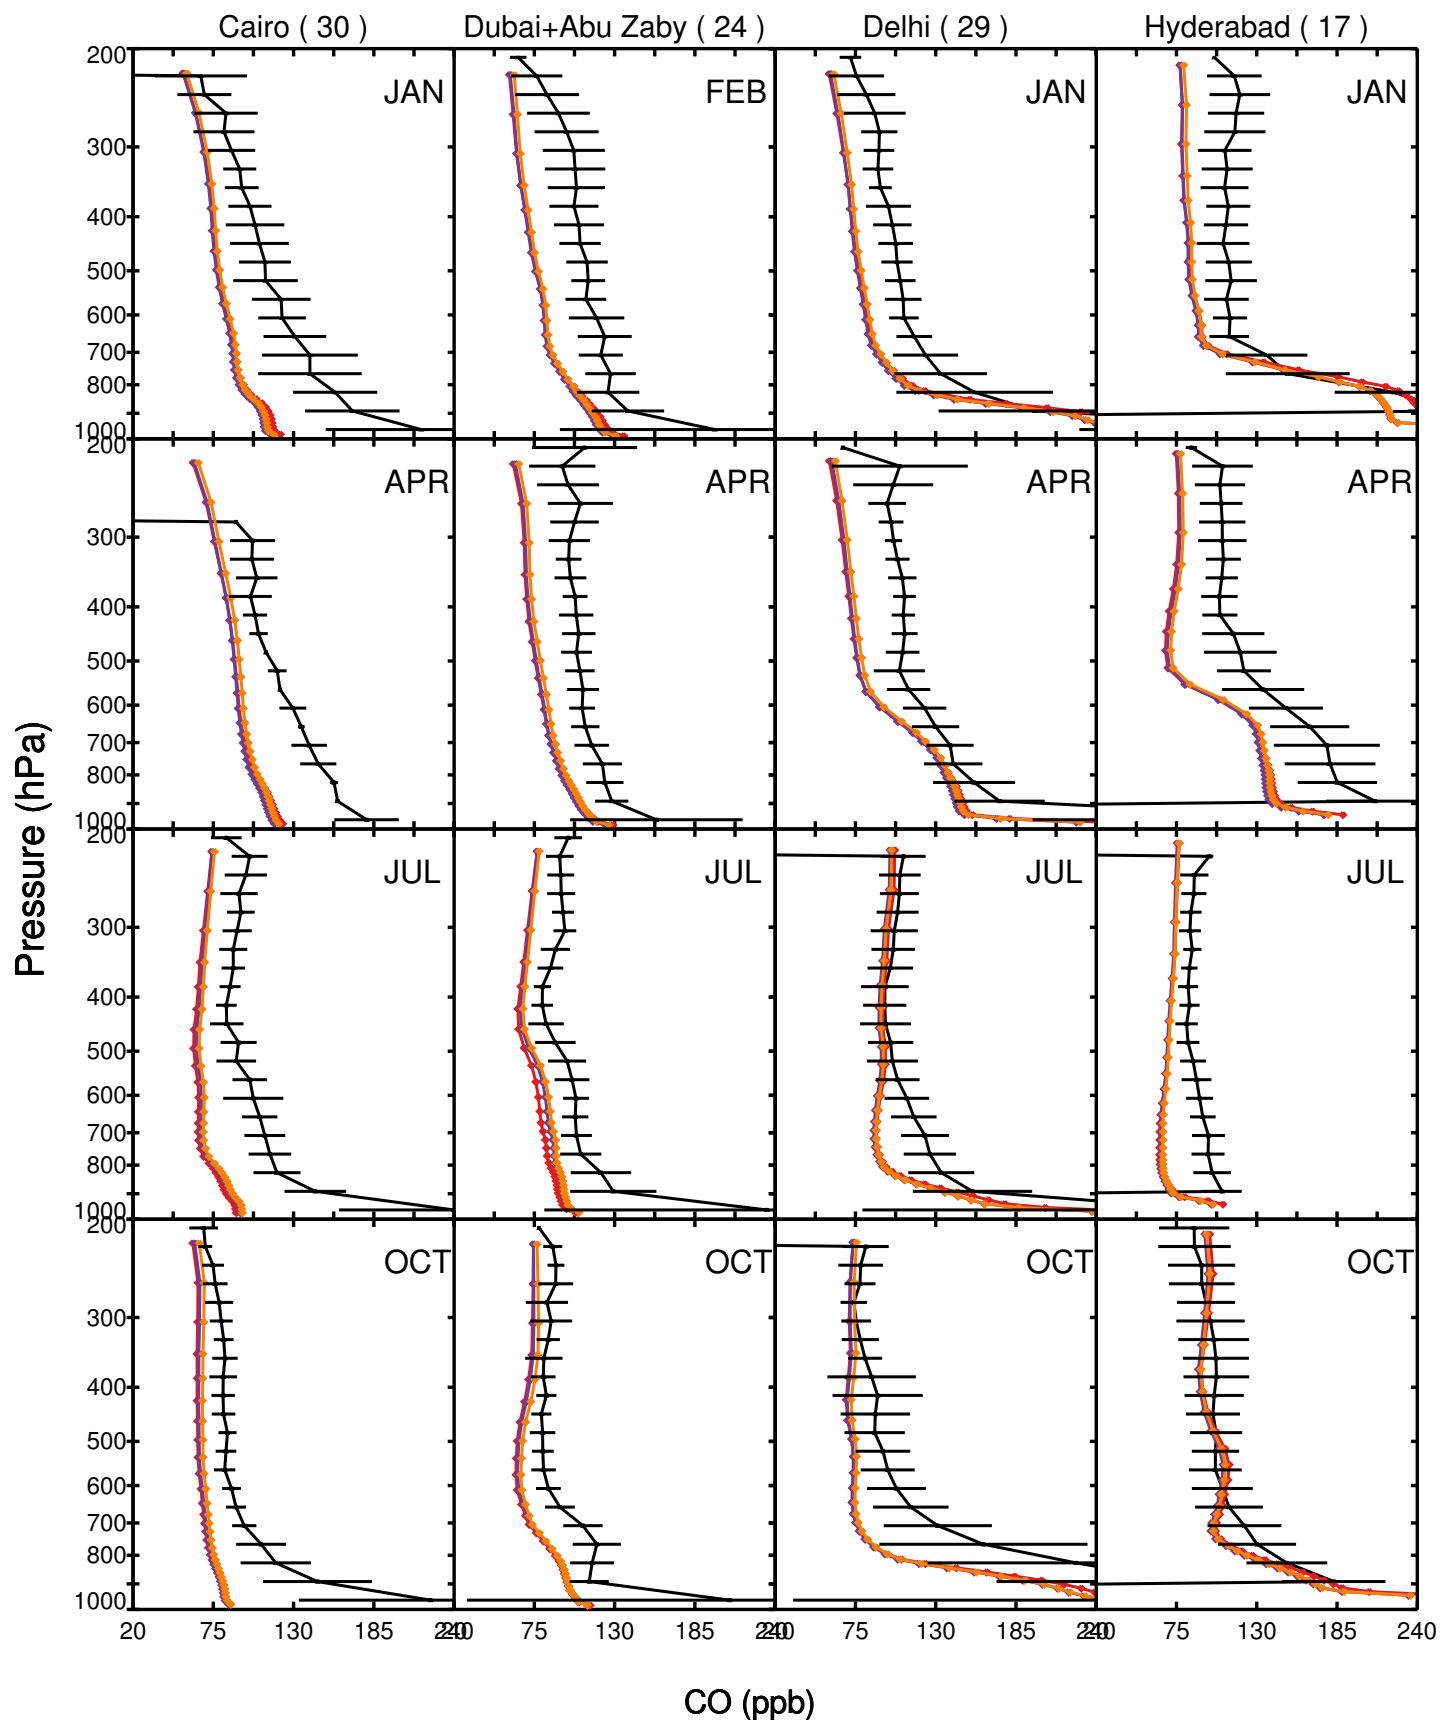

Red: old\_tagCO (2010); Purple: new\_tagCO (2010); Blue: full\_chemistry (2010)

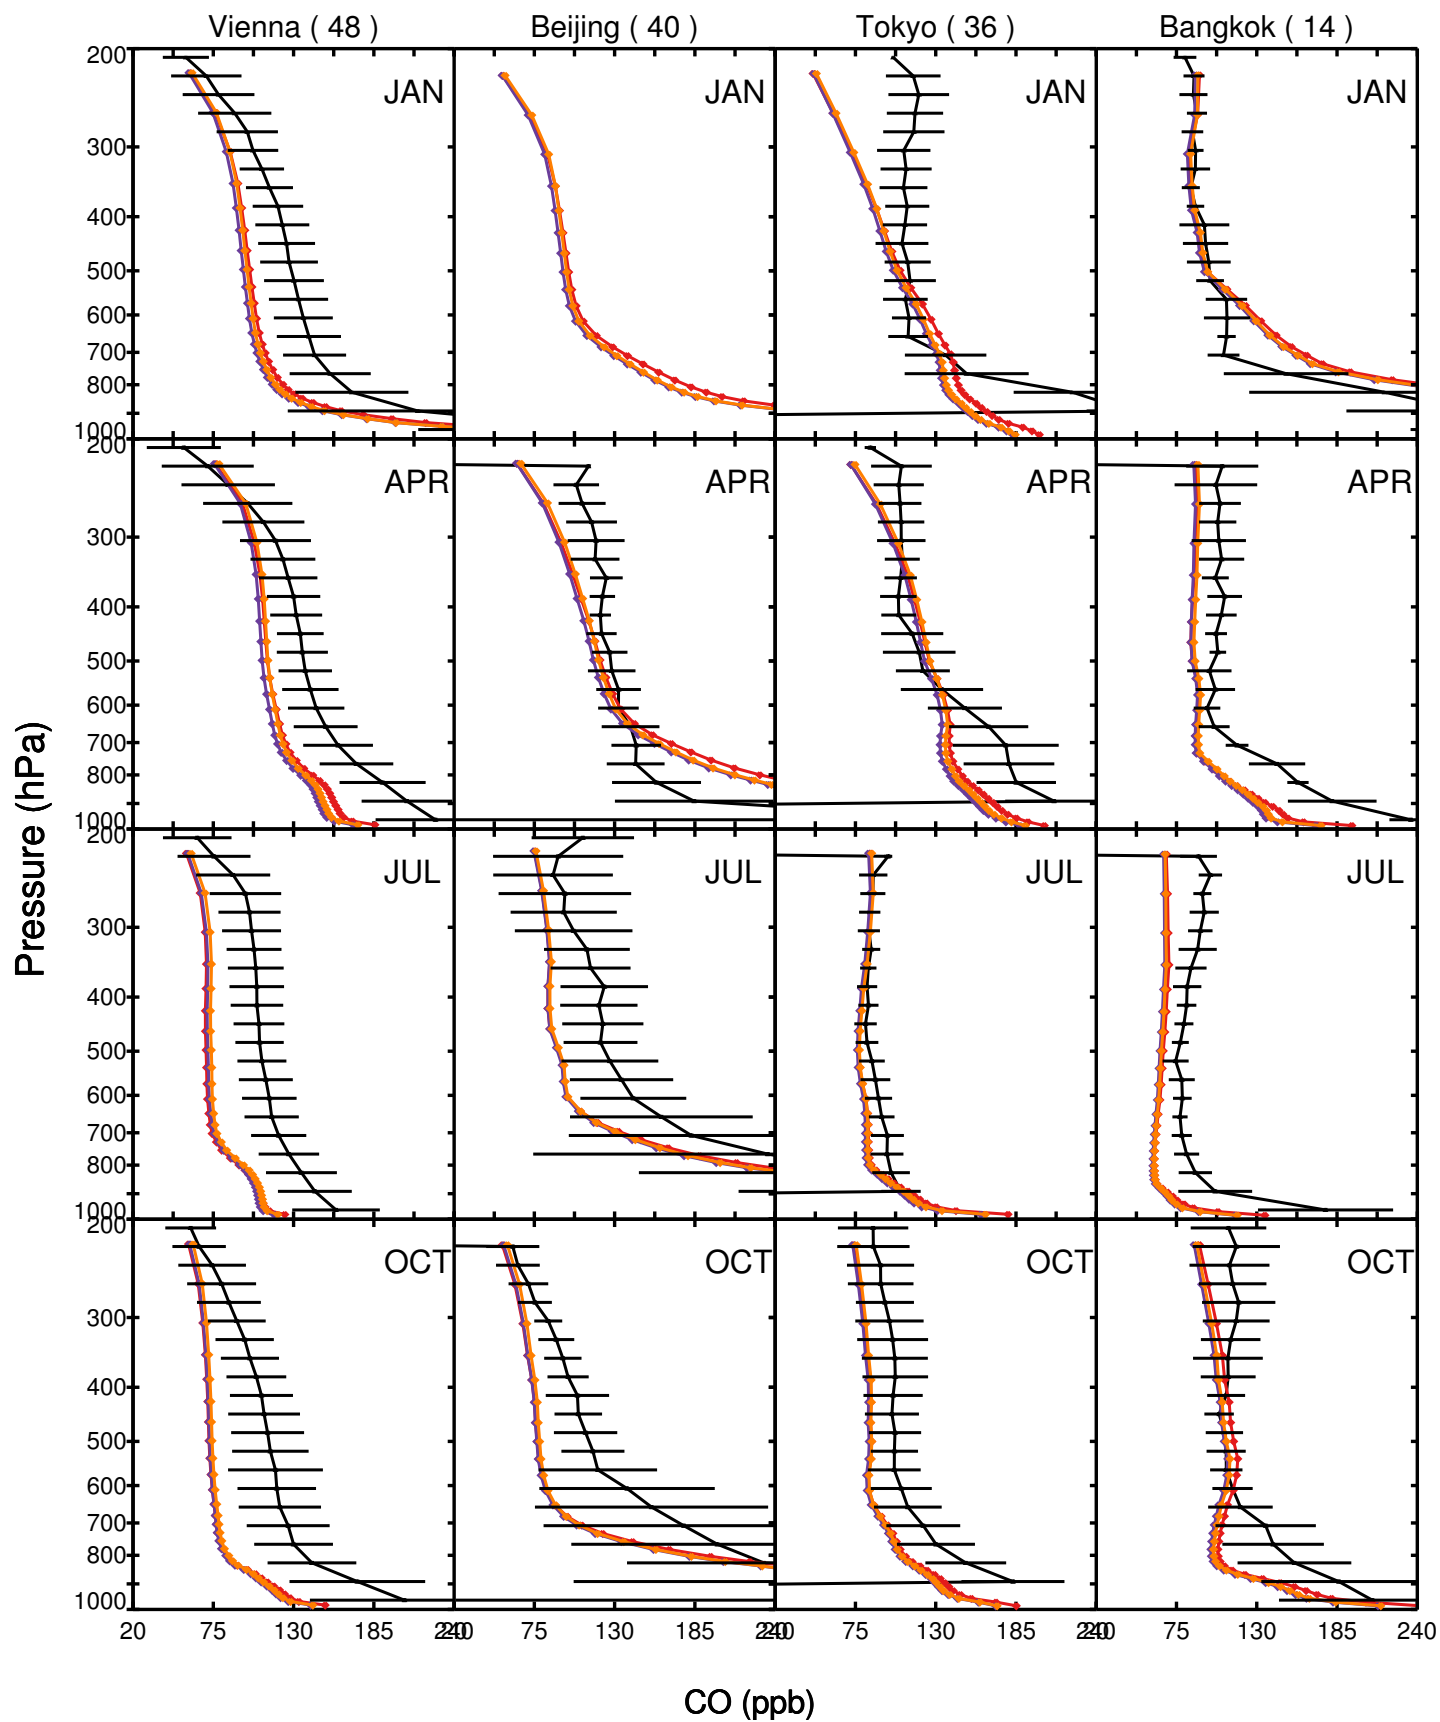

Red: old\_tagCO (2010); Purple: new\_tagCO (2010); Blue: full\_chemistry (2010)

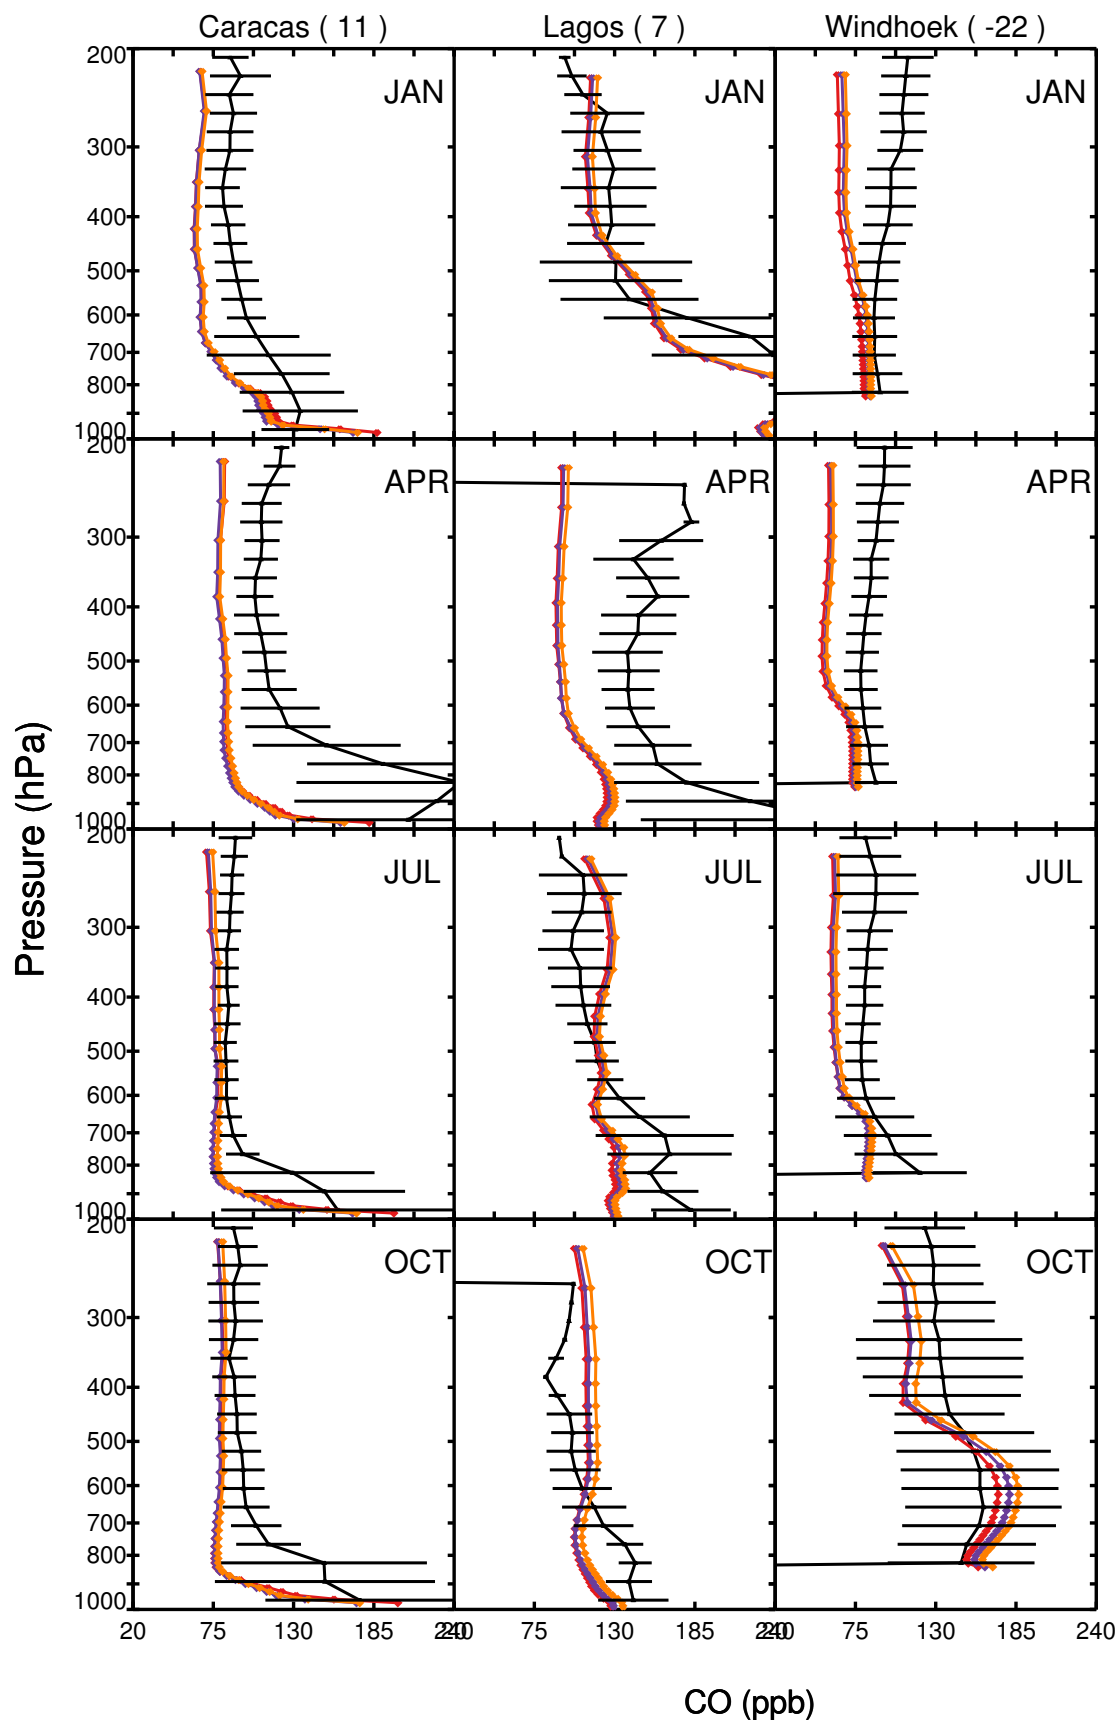

Red: old\_tagCO (2010); Purple: new\_tagCO (2010); Blue: full\_chemistry (2010)

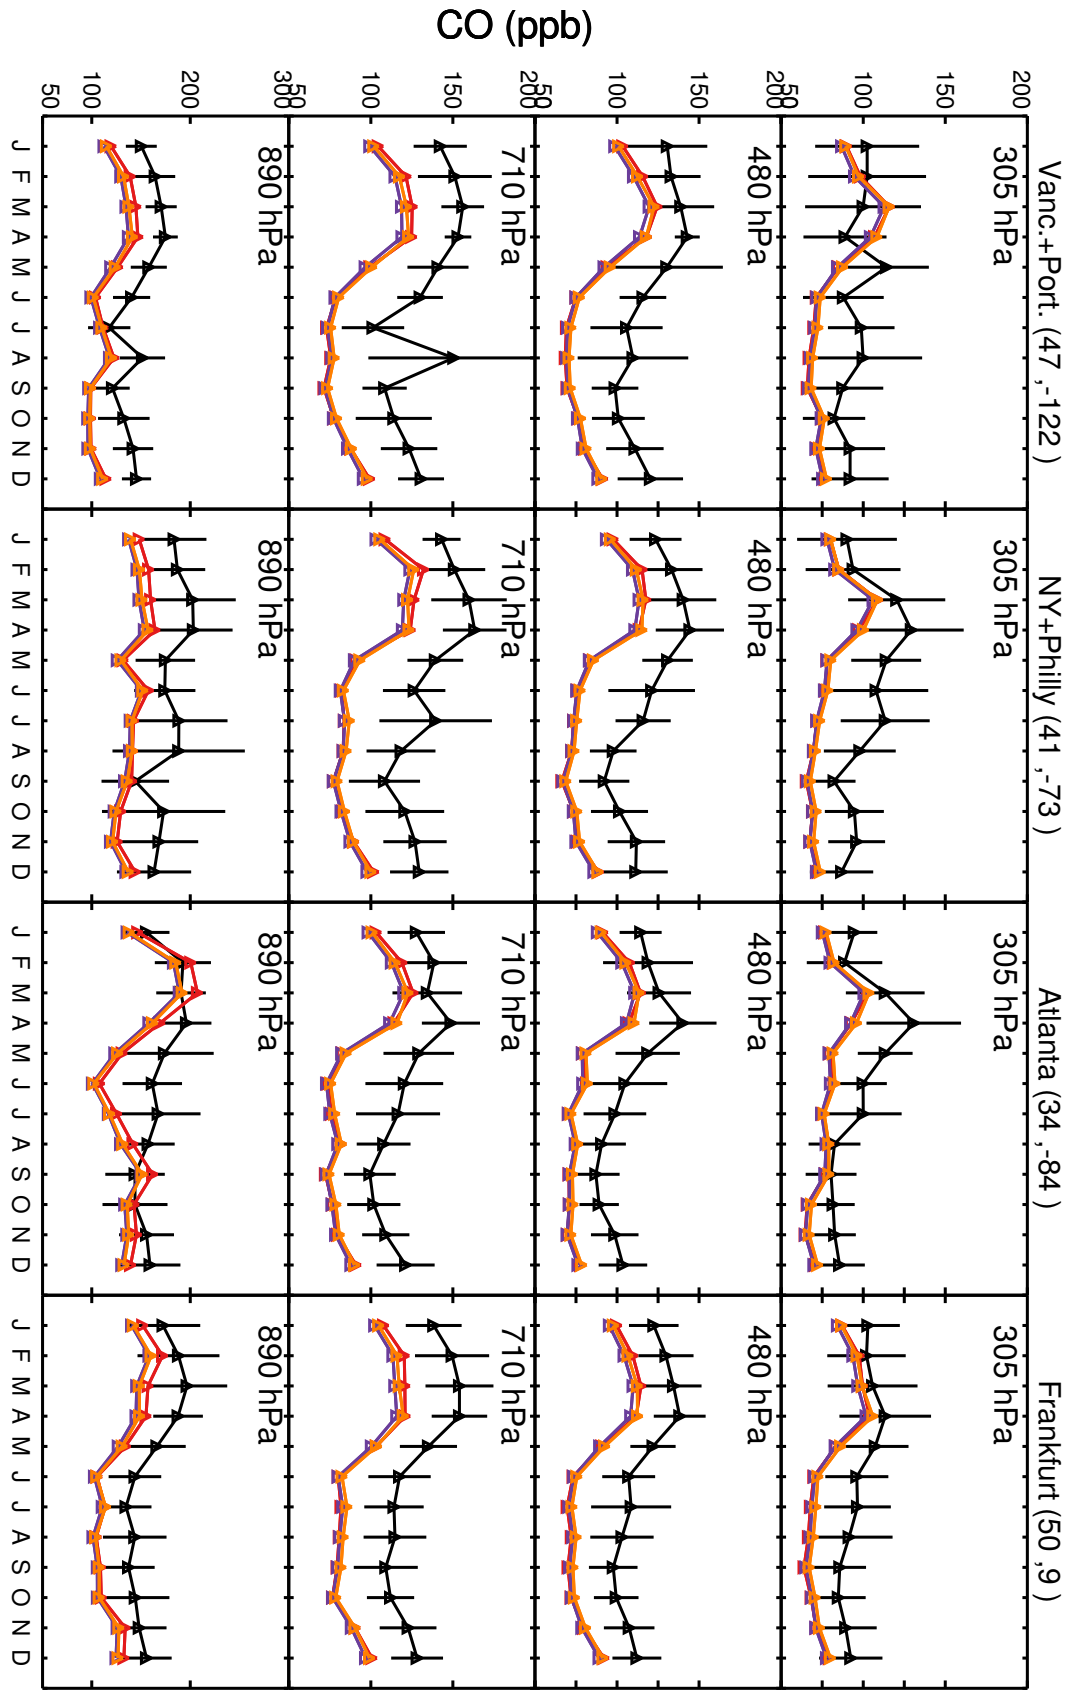

Red: old\_tagCO (2010); Purple: new\_tagCO (2010); Blue: full\_chemistry (2010)

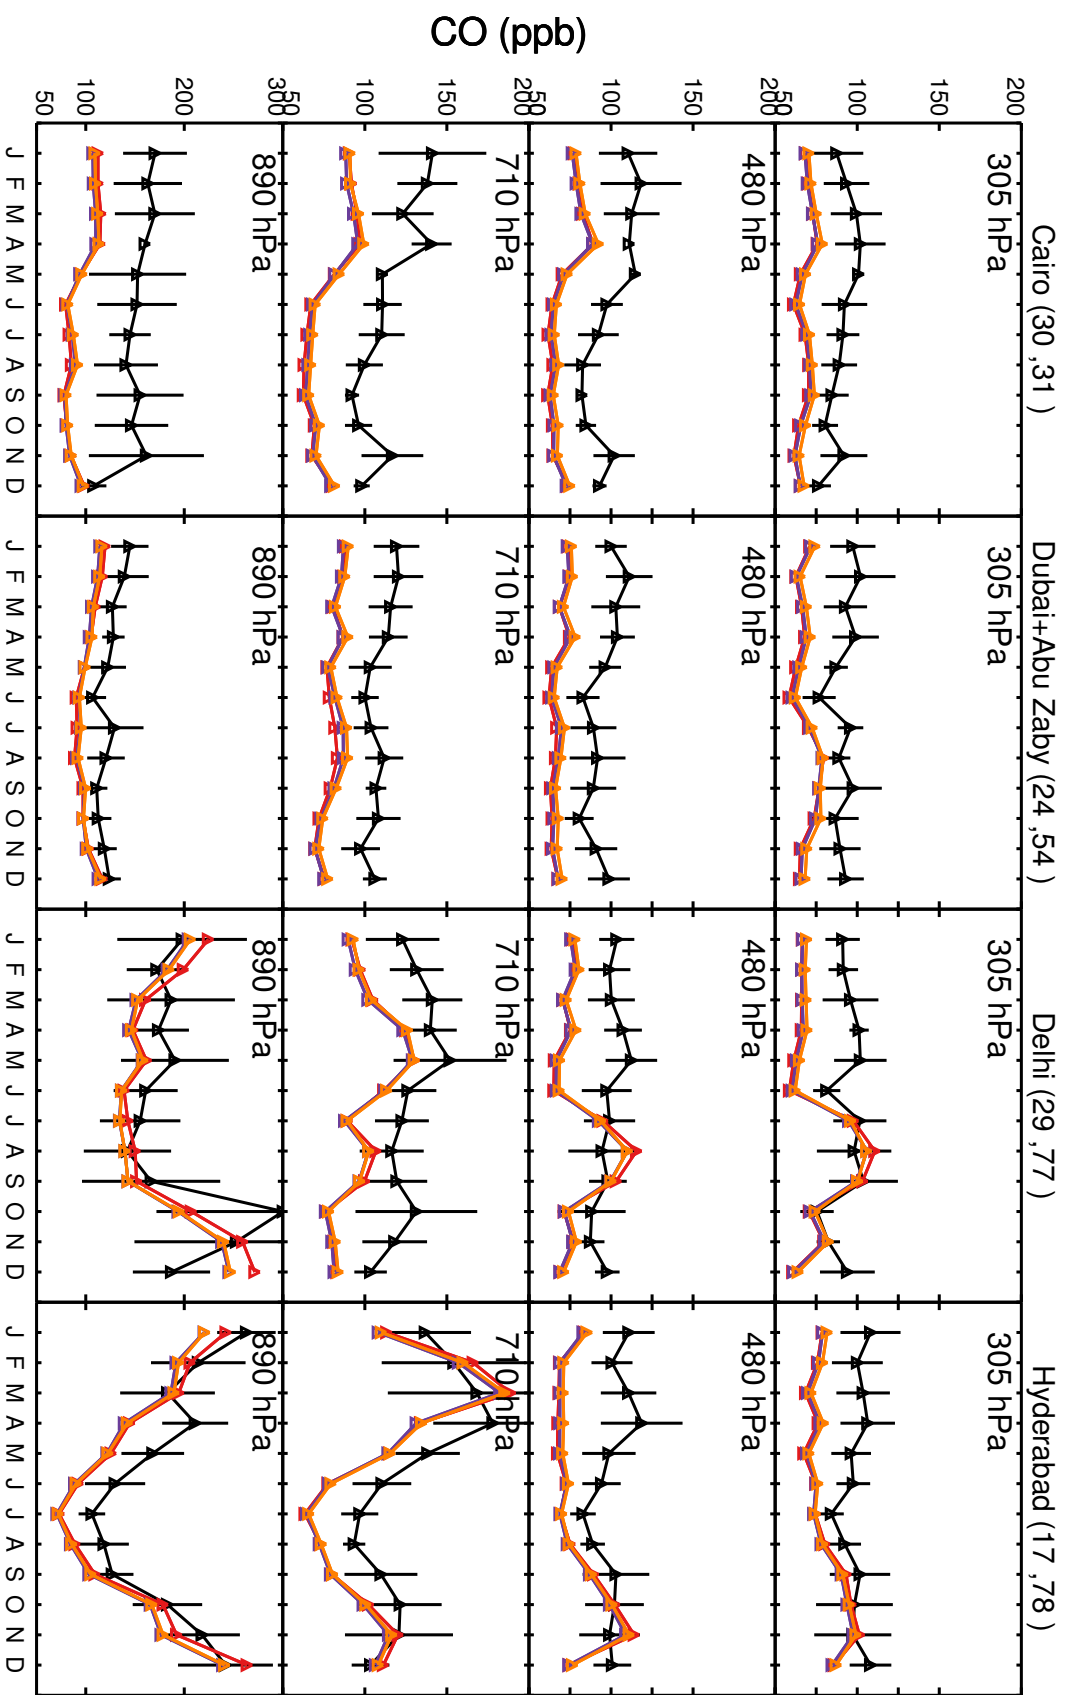

Red: old\_tagCO (2010); Purple: new\_tagCO (2010); Blue: full\_chemistry (2010)

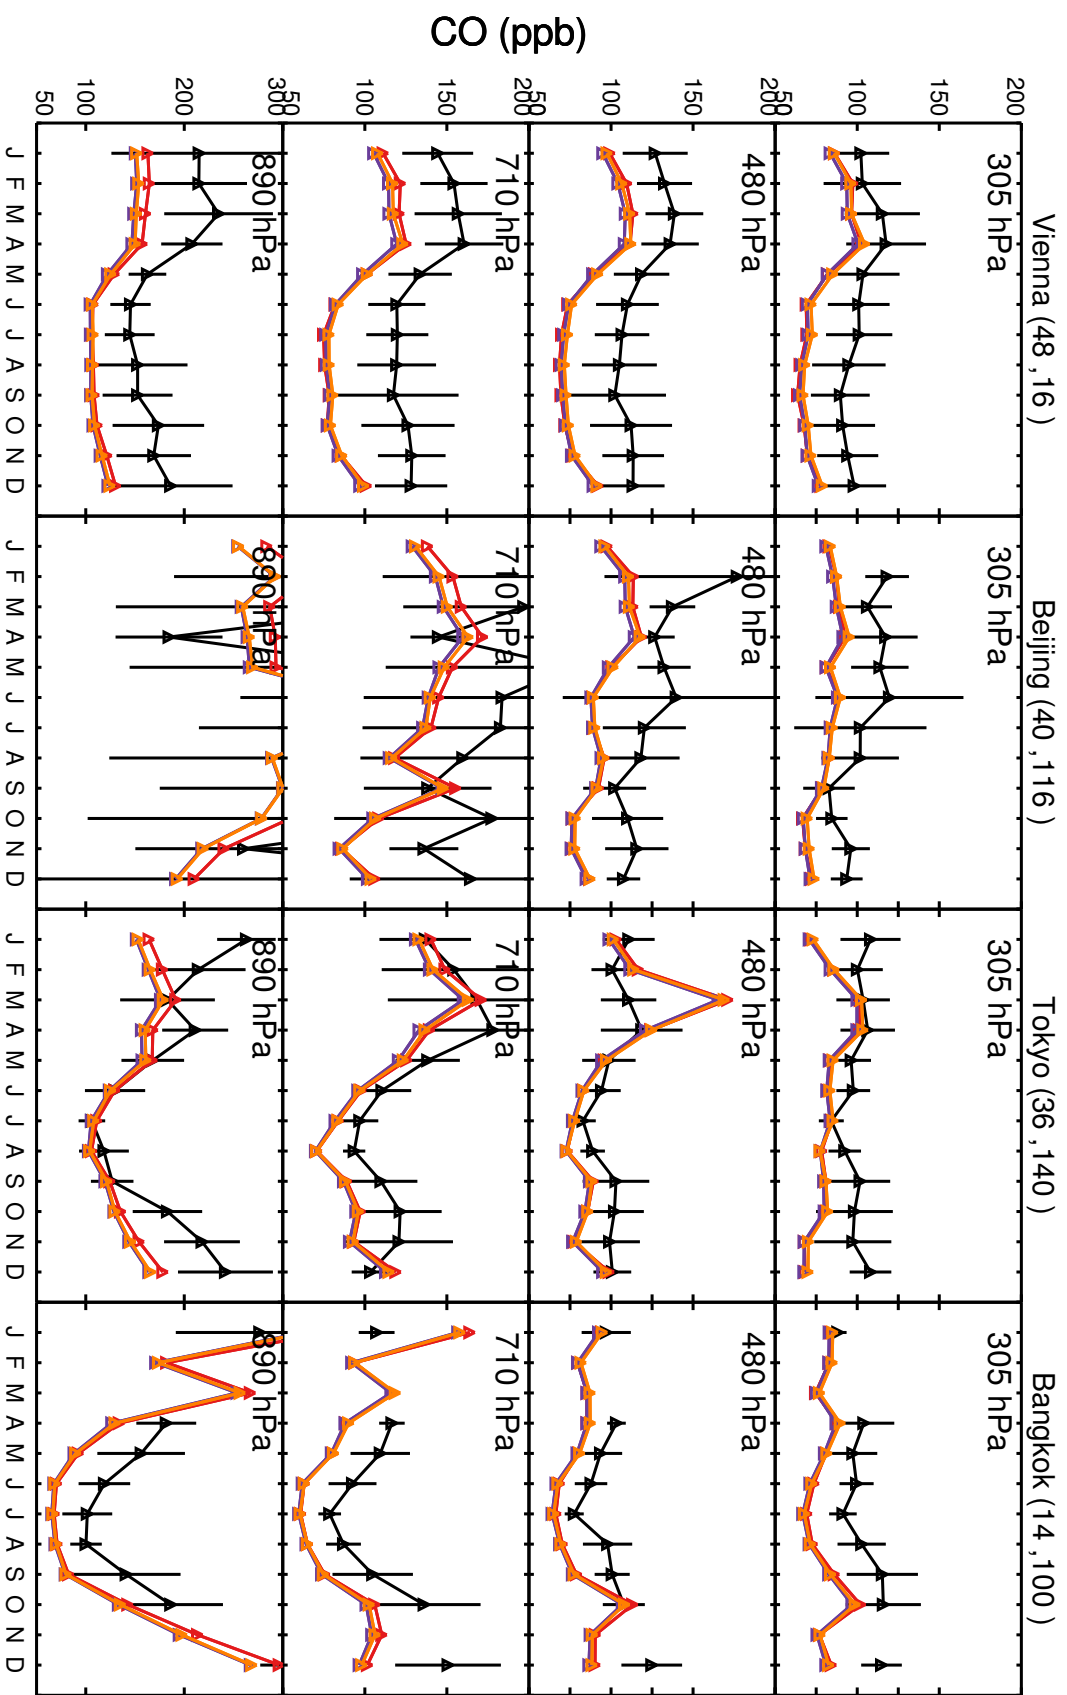

Red: old\_tagCO (2010); Purple: new\_tagCO (2010); Blue: full\_chemistry (2010)

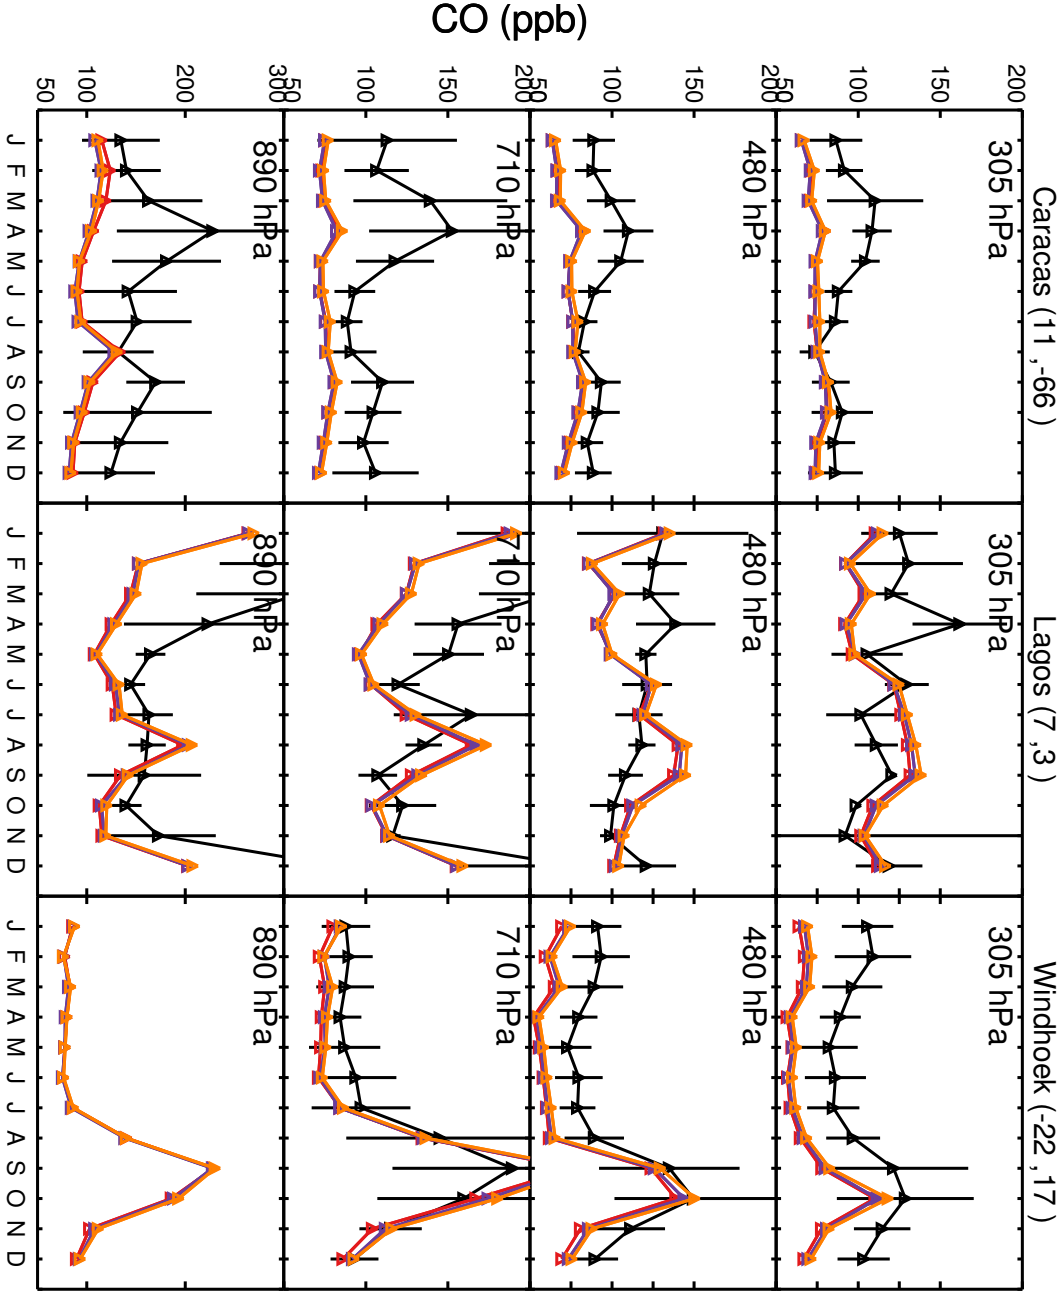

Red: old\_tagCO (2010); Purple: new\_tagCO (2010); Blue: full\_chemistry (2010)

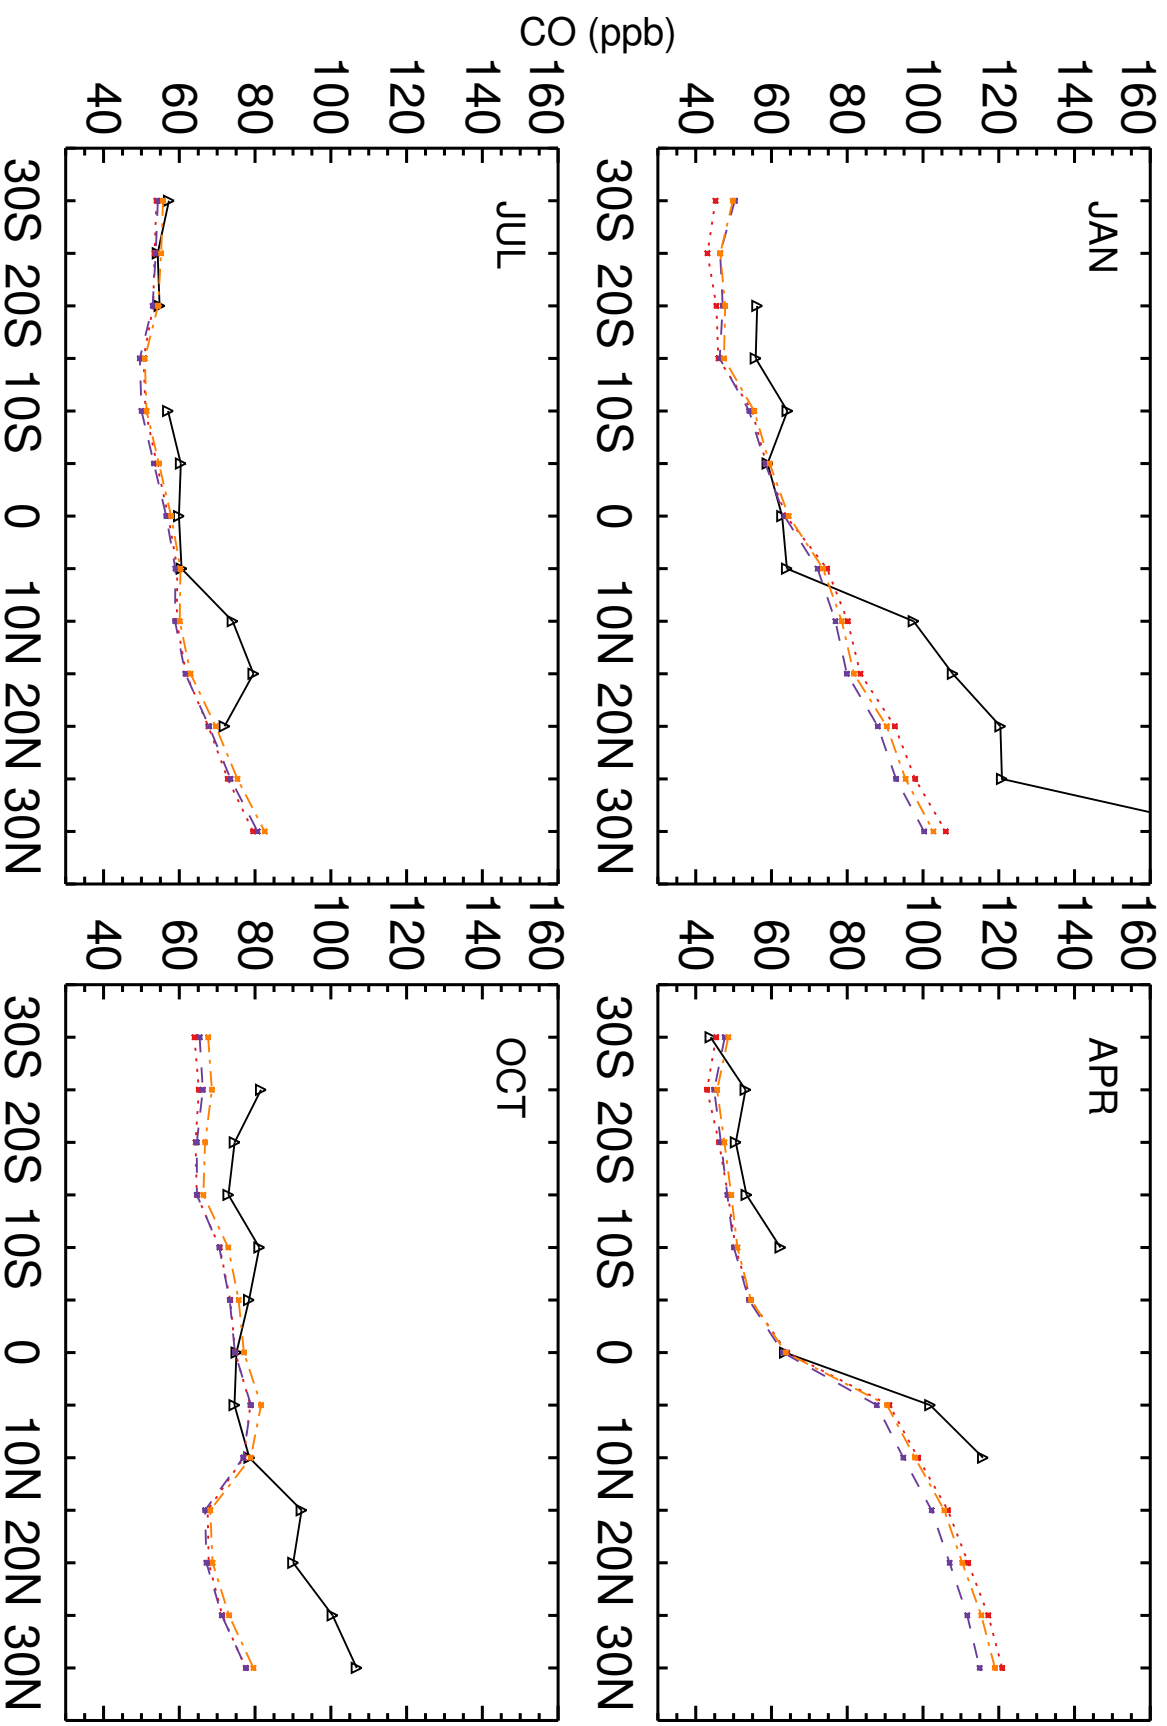

Red: old\_tagCO (2010); Purple: new\_tagCO (2010); Blue: full\_chemistry (2010)

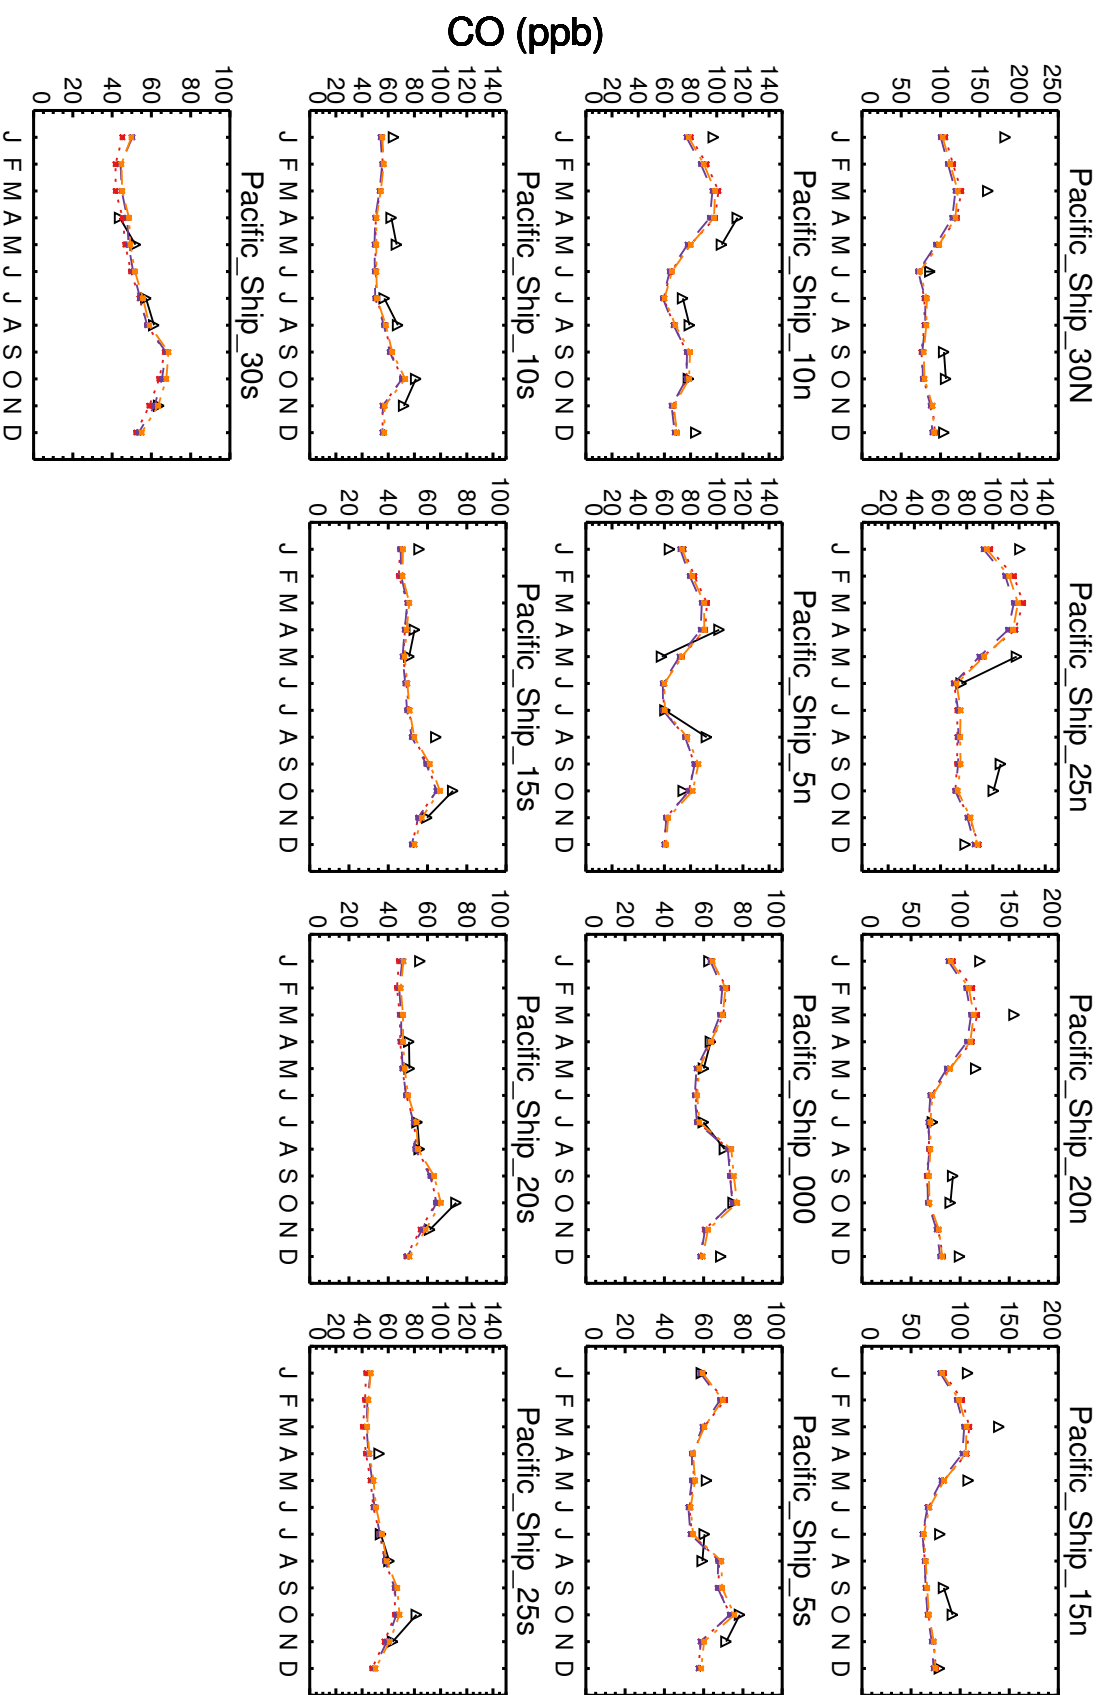

Red: old\_tagCO (2010); Purple: new\_tagCO (2010); Blue: full\_chemistry (2010)

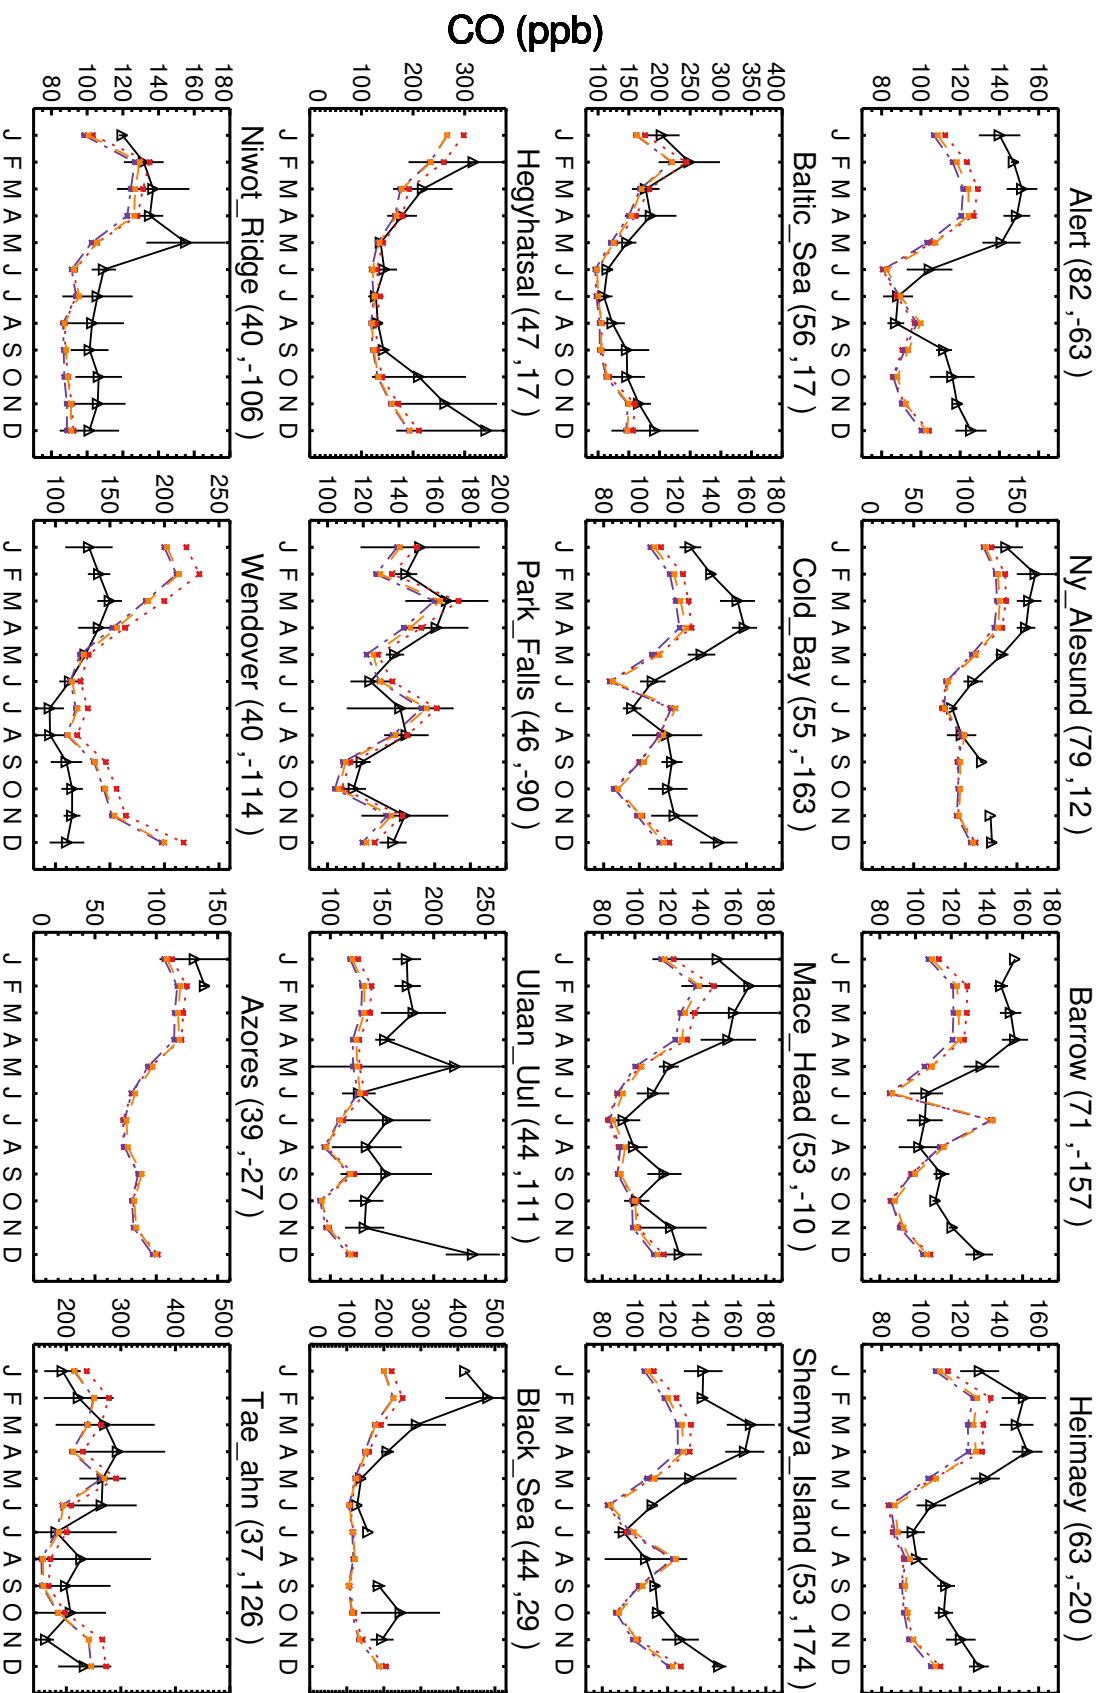

Red: old\_tagCO (2010); Purple: new\_tagCO (2010); Blue: full\_chemistry (2010)

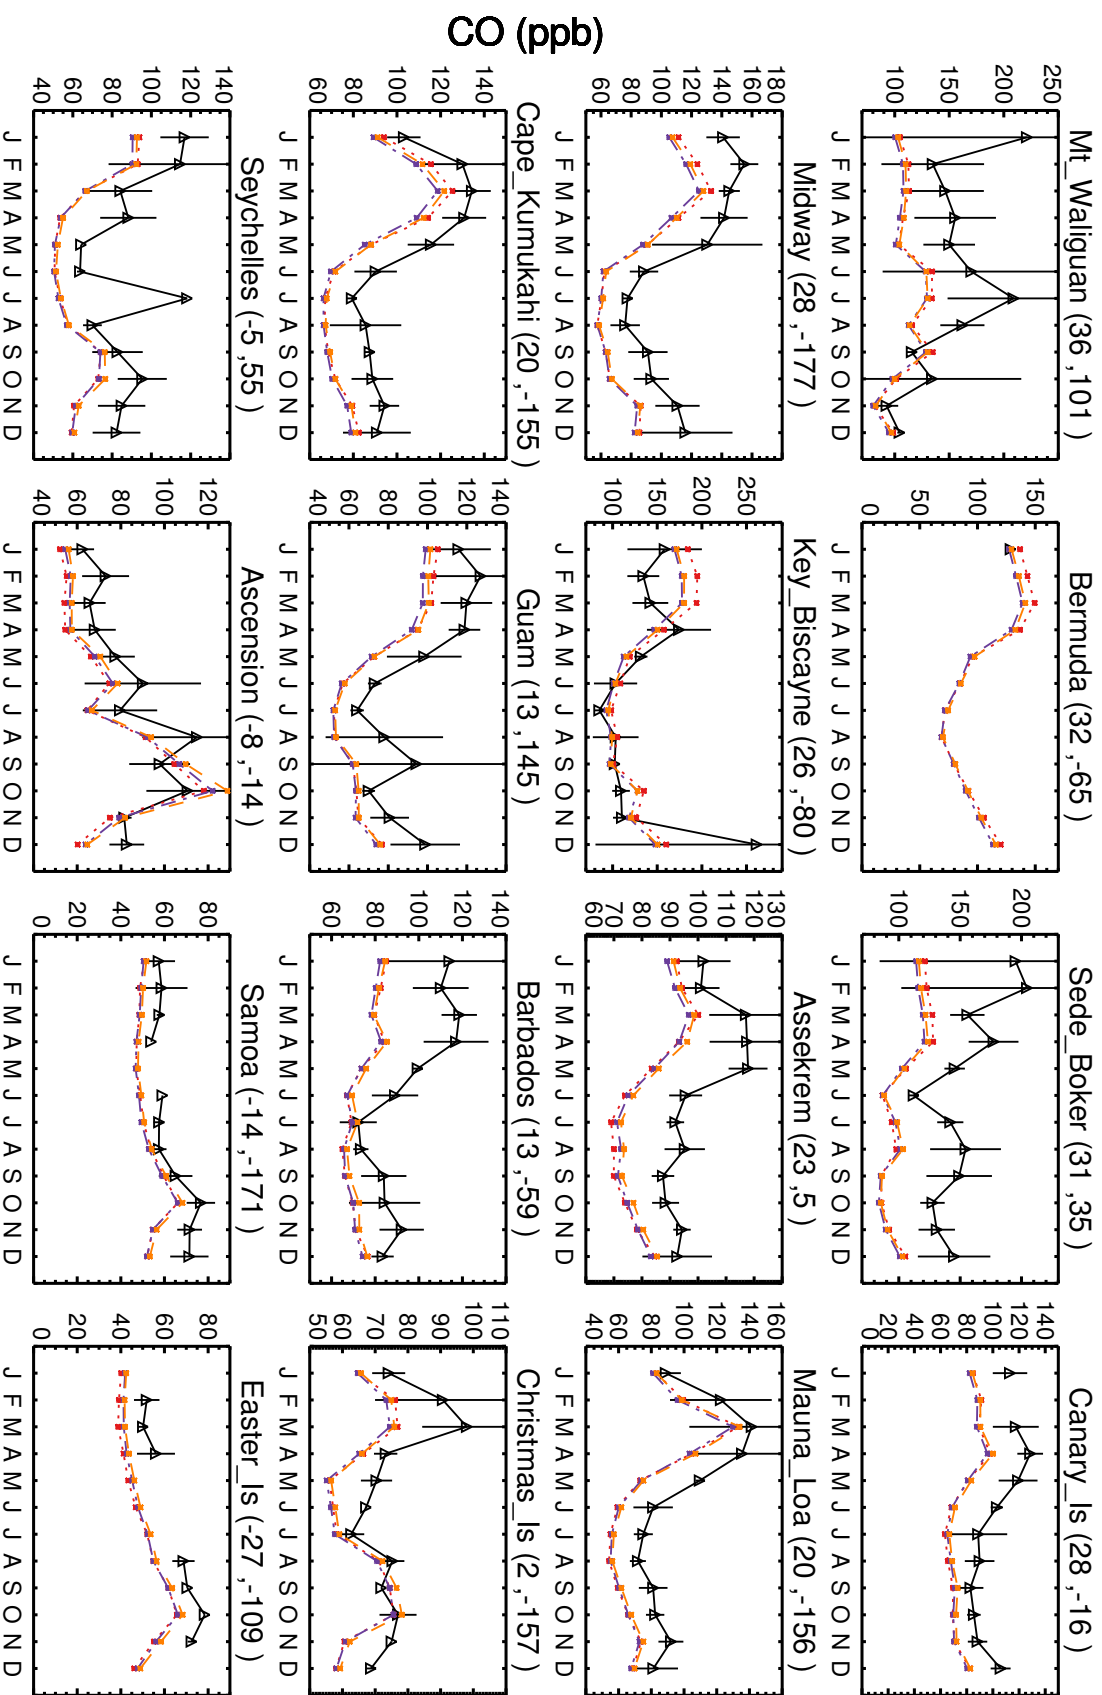

Red: old\_tagCO (2010); Purple: new\_tagCO (2010); Blue: full\_chemistry (2010)

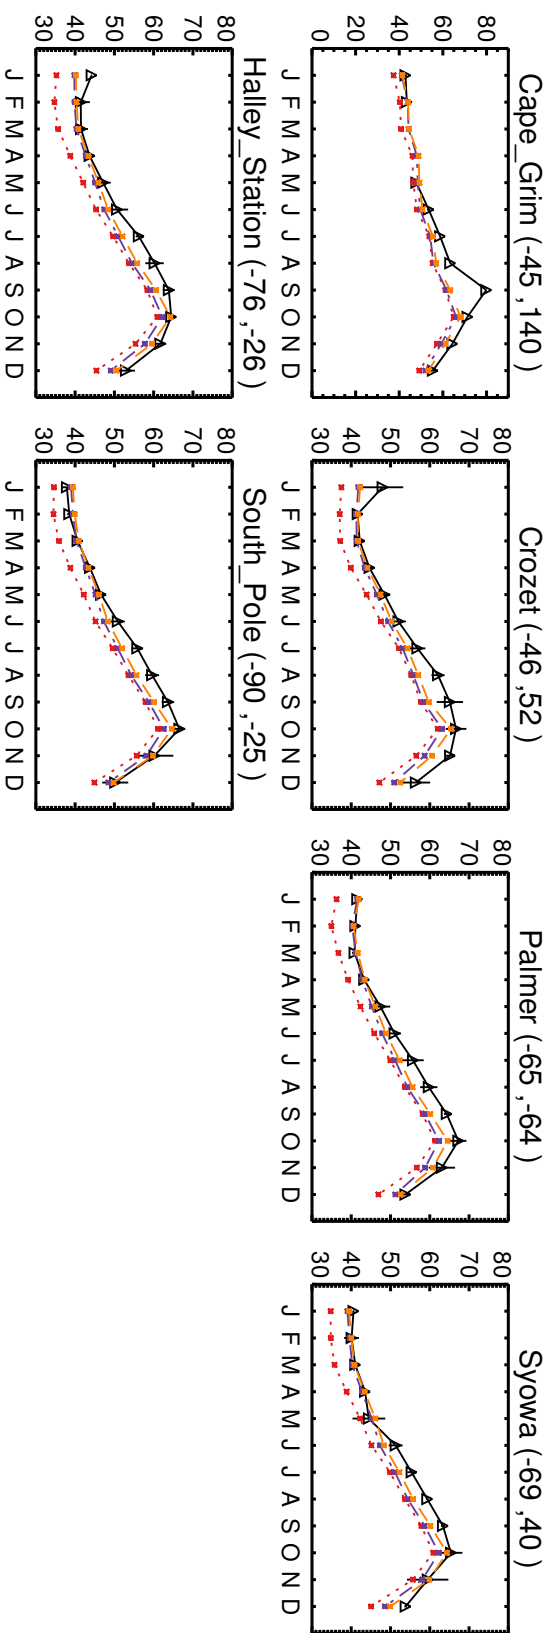

CO (ppb)

# GEOS-Chem Difference Maps at surface and 500 hPa

new\_tagCO - full\_chemistry  
CO - Diff @ Surface for Apr

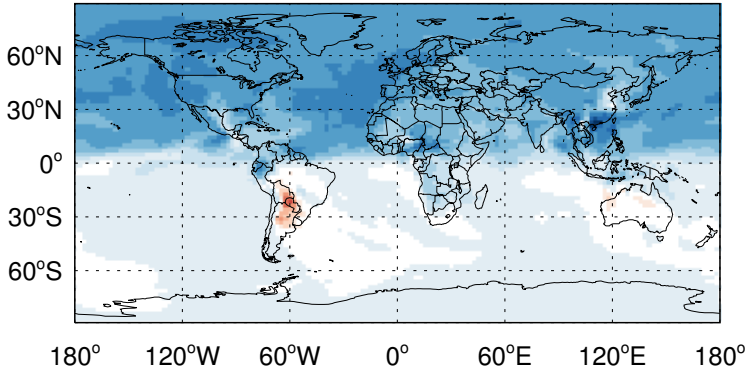

new\_tagCO - full\_chemistry  
CO- Diff @ 500 hPa for Apr

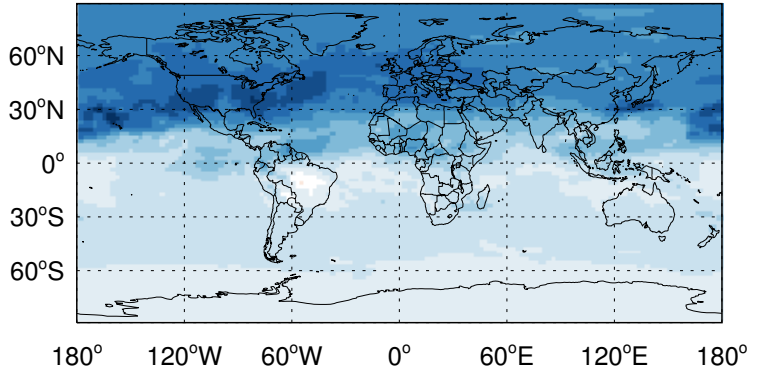

old\_tagCO - full\_chemistry  
CO - Diff @ Surface for Apr

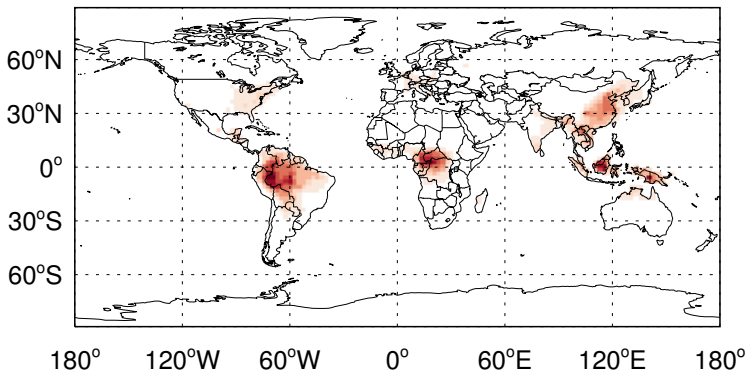

old\_tagCO - full\_chemistry  
CO- Diff @ 500 hPa for Apr

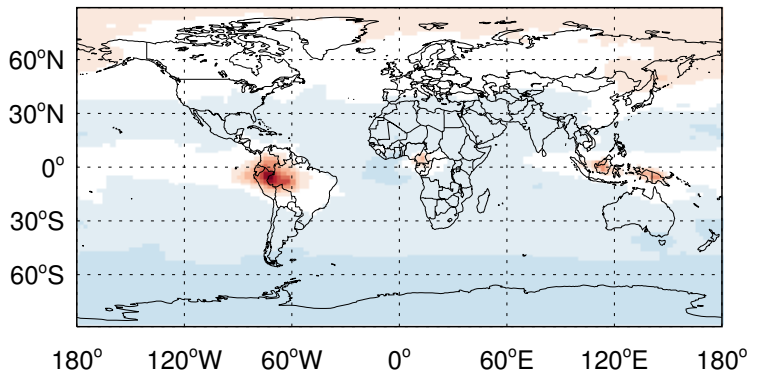

# GEOS-Chem Difference Maps at surface and 500 hPa

new\_tagCO - full\_chemistry  
CO - Diff @ Surface for Apr

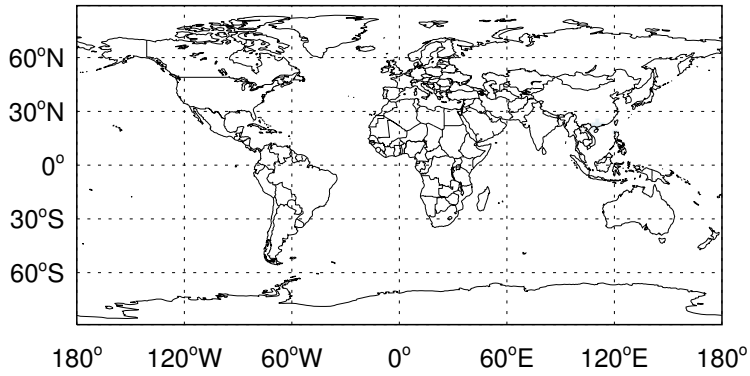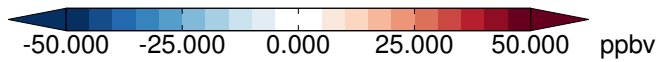

new\_tagCO - full\_chemistry  
CO- Diff @ 500 hPa for Apr

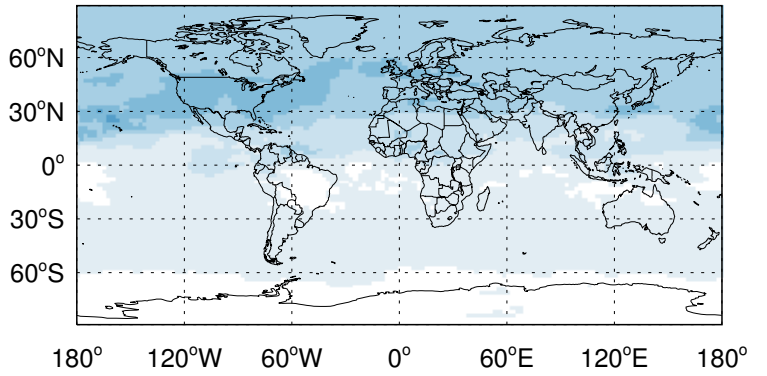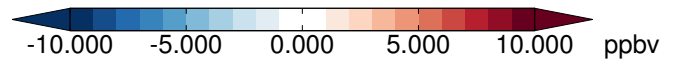

old\_tagCO - full\_chemistry  
CO - Diff @ Surface for Apr

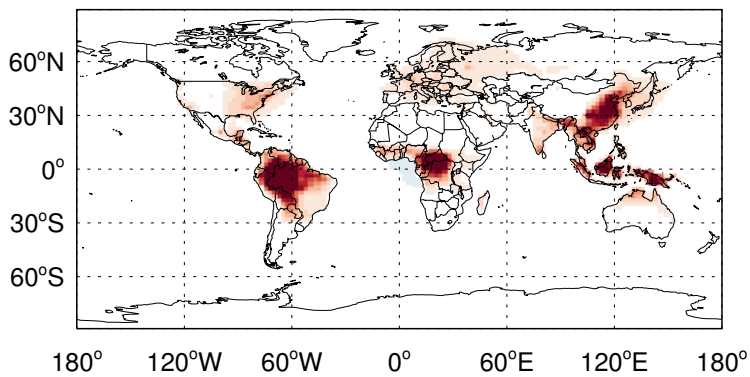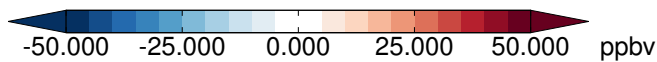

old\_tagCO - full\_chemistry  
CO- Diff @ 500 hPa for Apr

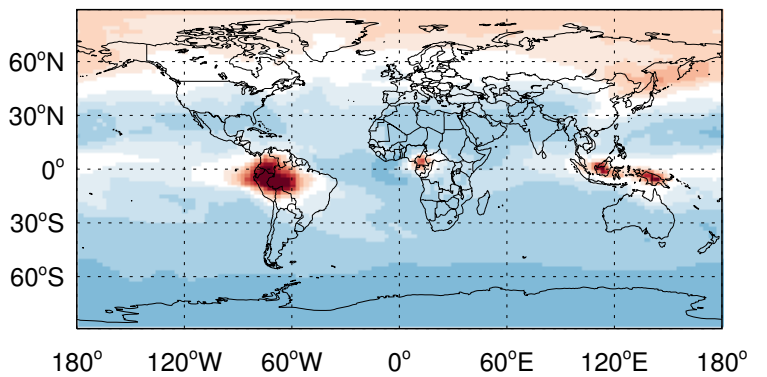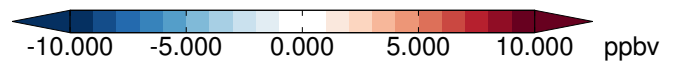

# GEOS-Chem Difference Maps at surface and 500 hPa

new\_tagCO - full\_chemistry  
CO - Diff @ Surface for Jan

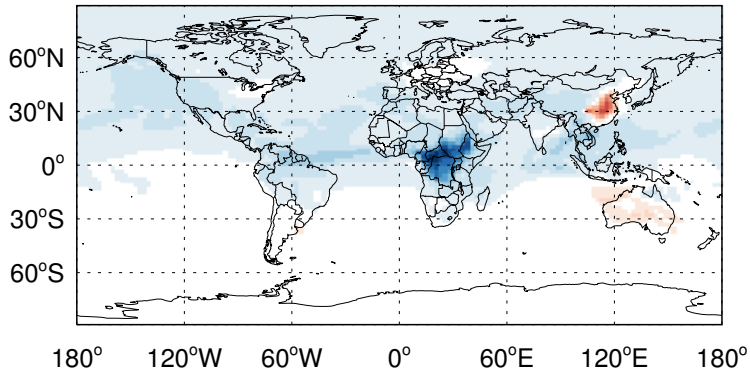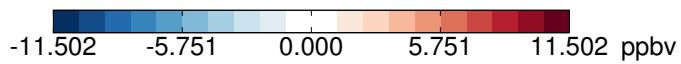

new\_tagCO - full\_chemistry  
CO- Diff @ 500 hPa for Jan

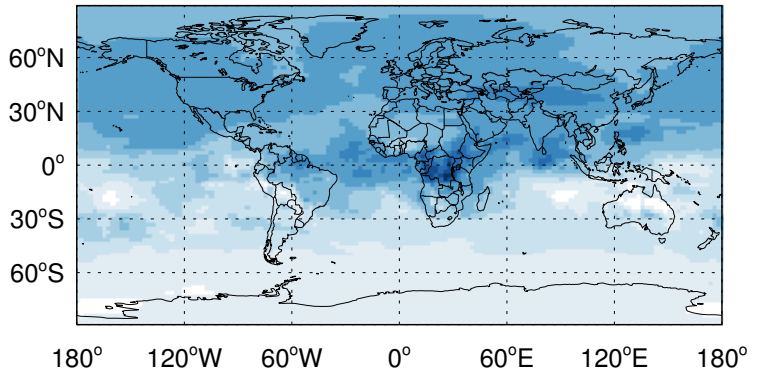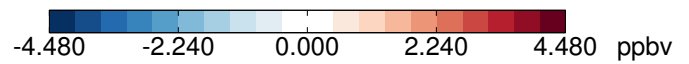

old\_tagCO - full\_chemistry  
CO - Diff @ Surface for Jan

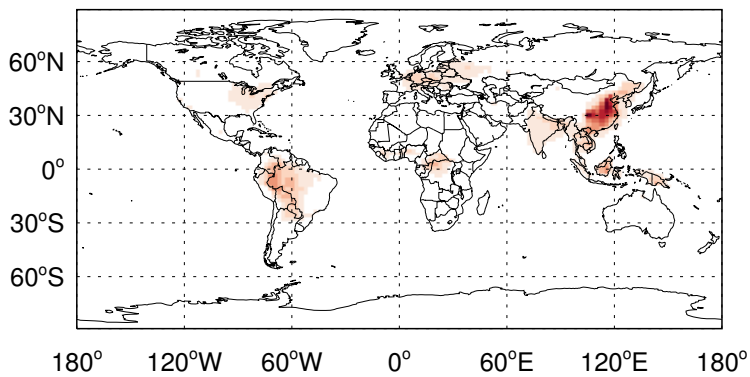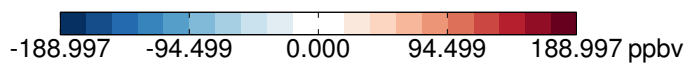

old\_tagCO - full\_chemistry  
CO- Diff @ 500 hPa for Jan

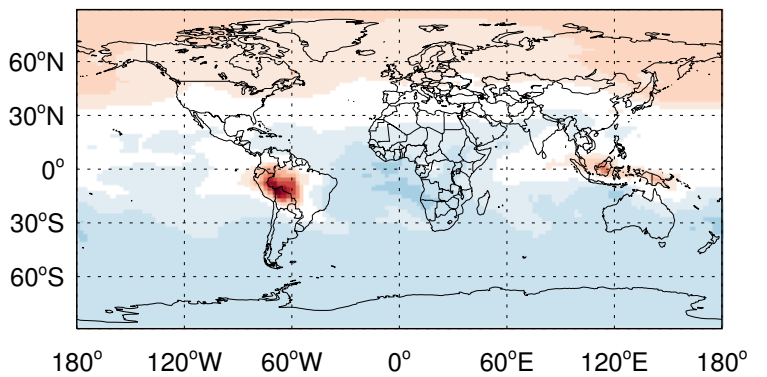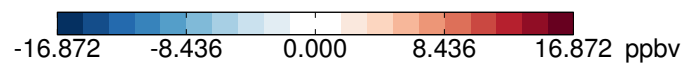

# GEOS-Chem Difference Maps at surface and 500 hPa

new\_tagCO - full\_chemistry  
CO - Diff @ Surface for Jan

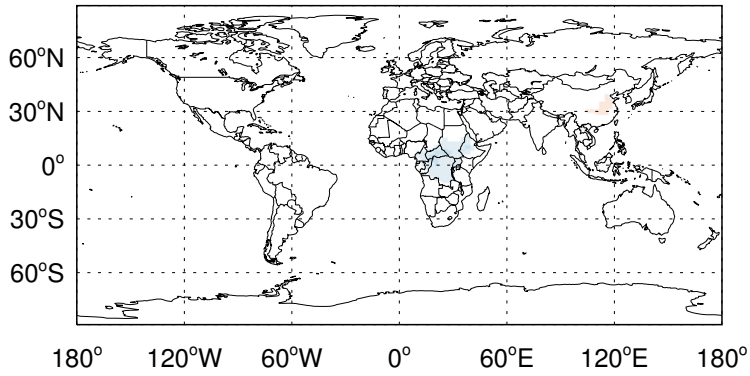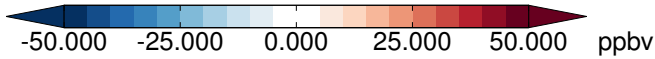

new\_tagCO - full\_chemistry  
CO- Diff @ 500 hPa for Jan

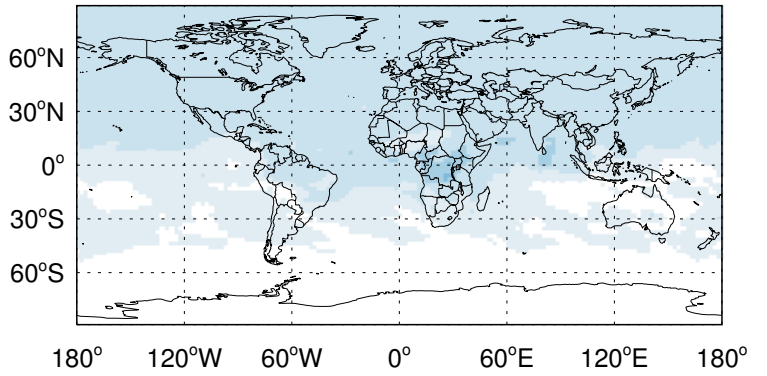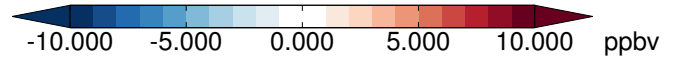

old\_tagCO - full\_chemistry  
CO - Diff @ Surface for Jan

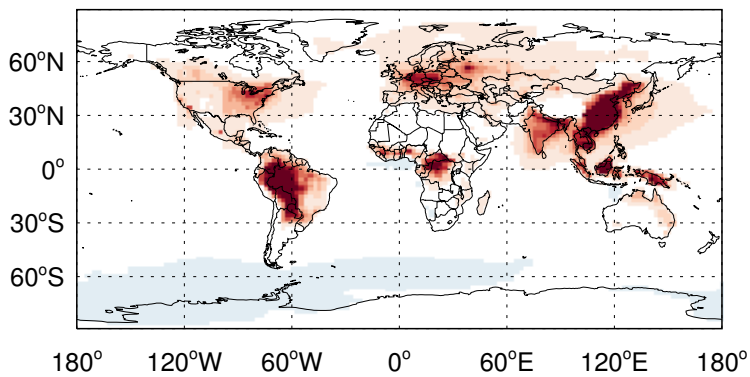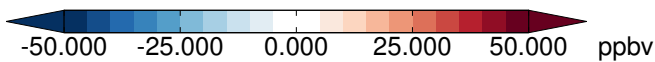

old\_tagCO - full\_chemistry  
CO- Diff @ 500 hPa for Jan

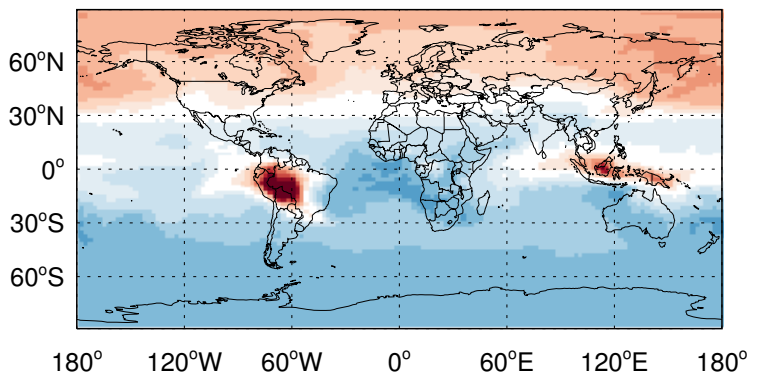

# GEOS-Chem Difference Maps at surface and 500 hPa

new\_tagCO - full\_chemistry  
CO - Diff @ Surface for Jul

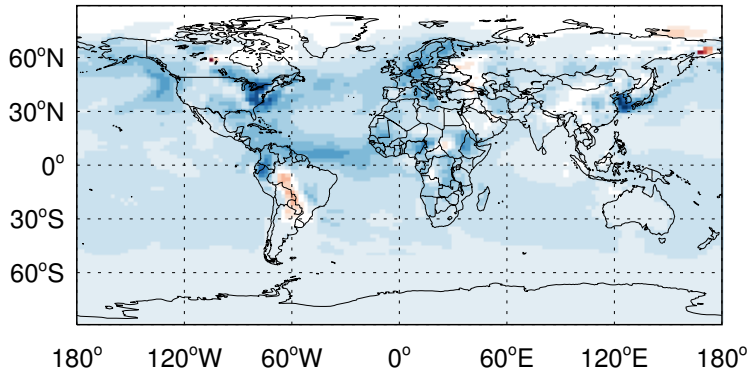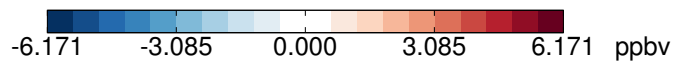

new\_tagCO - full\_chemistry  
CO- Diff @ 500 hPa for Jul

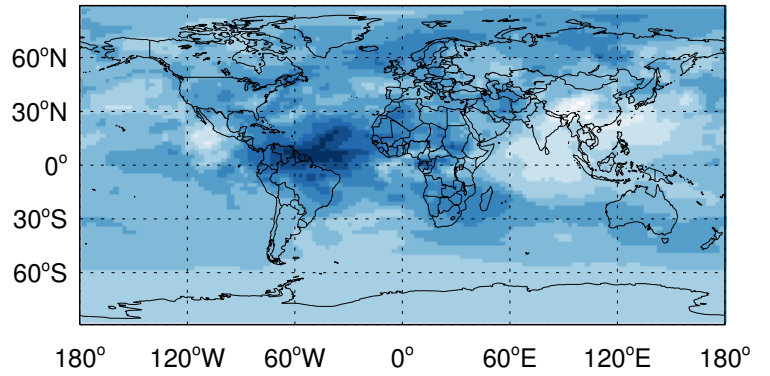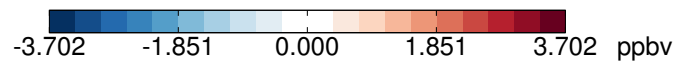

old\_tagCO - full\_chemistry  
CO - Diff @ Surface for Jul

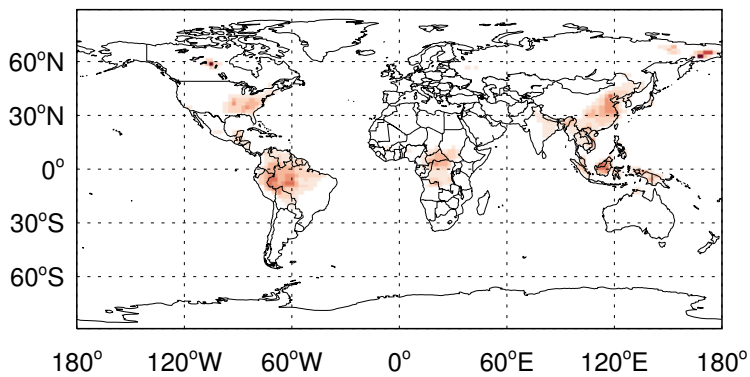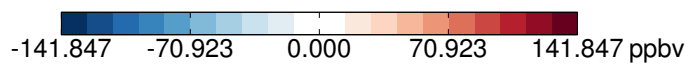

old\_tagCO - full\_chemistry  
CO- Diff @ 500 hPa for Jul

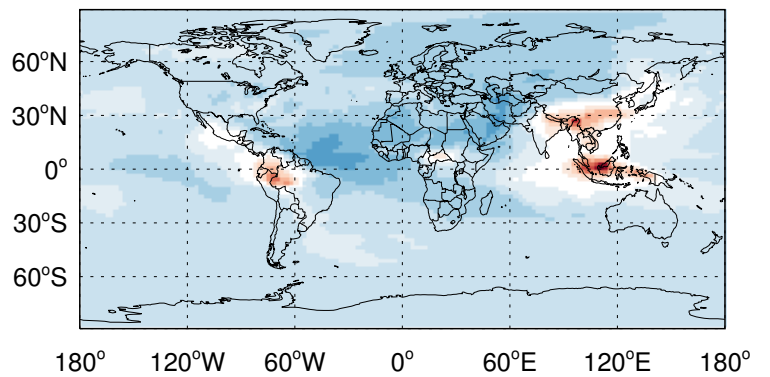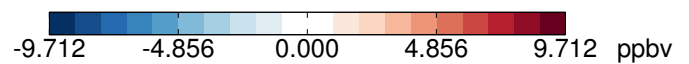

# GEOS-Chem Difference Maps at surface and 500 hPa

new\_tagCO - full\_chemistry

CO - Diff @ Surface for Jul

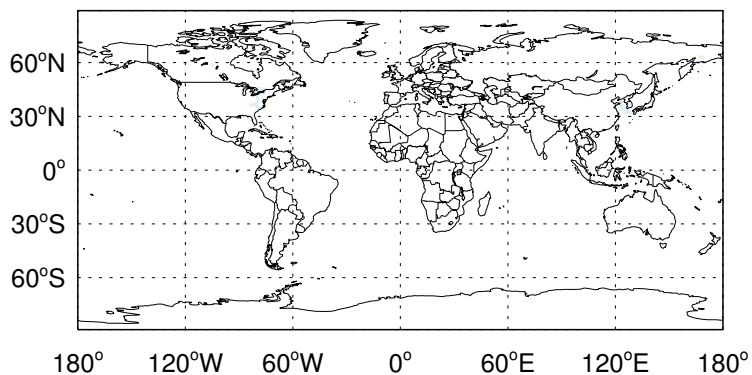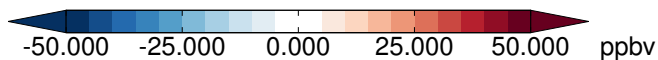

new\_tagCO - full\_chemistry

CO- Diff @ 500 hPa for Jul

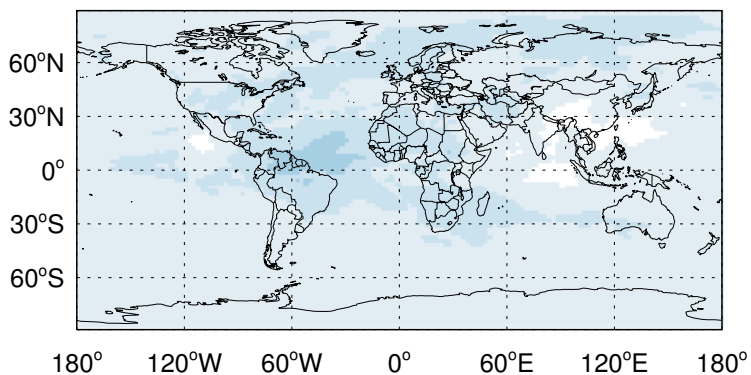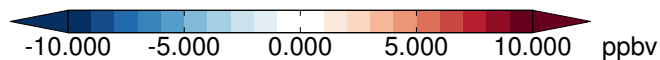

old\_tagCO - full\_chemistry

CO - Diff @ Surface for Jul

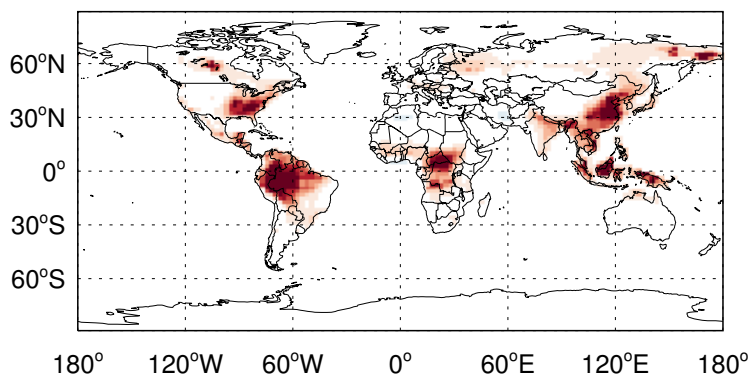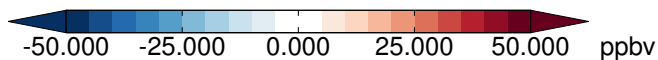

old\_tagCO - full\_chemistry

CO- Diff @ 500 hPa for Jul

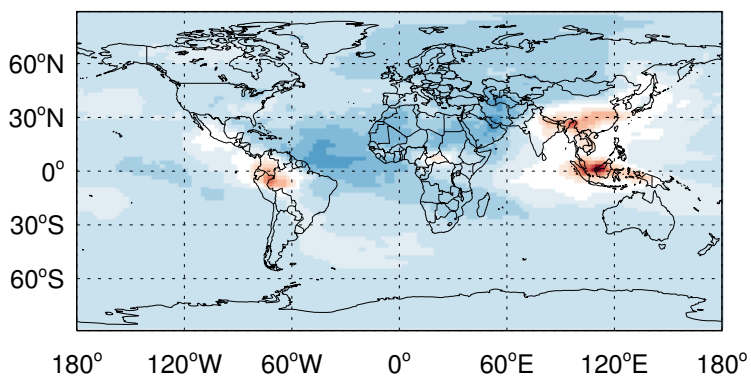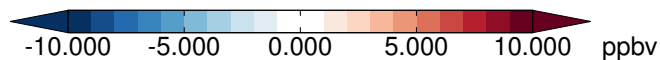

# GEOS-Chem Difference Maps at surface and 500 hPa

new\_tagCO - full\_chemistry  
CO - Diff @ Surface for Oct

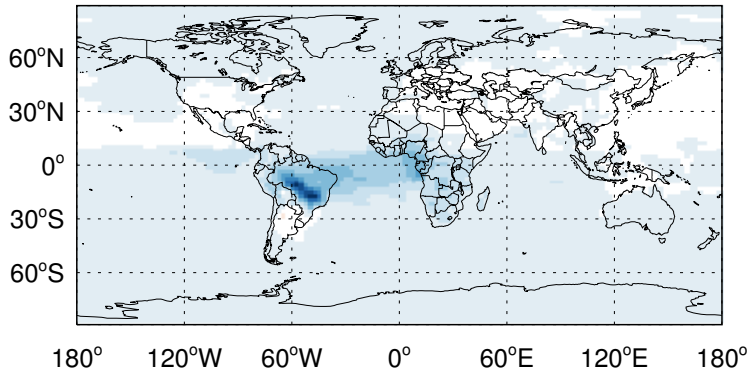

-17.713 -8.856 0.000 8.856 17.713 ppbv

new\_tagCO - full\_chemistry  
CO- Diff @ 500 hPa for Oct

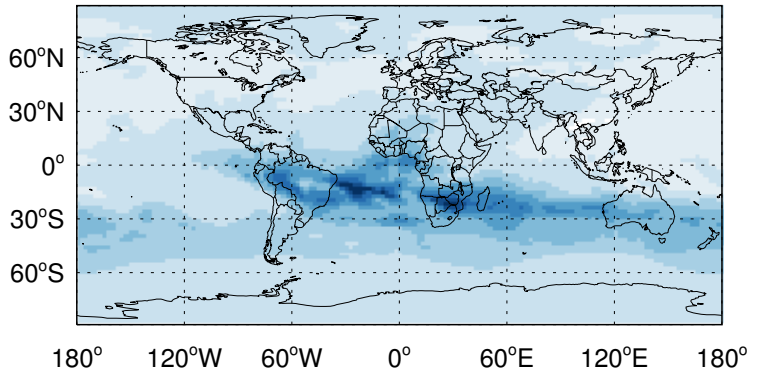

-10.207 -5.104 0.000 5.104 10.207 ppbv

old\_tagCO - full\_chemistry  
CO - Diff @ Surface for Oct

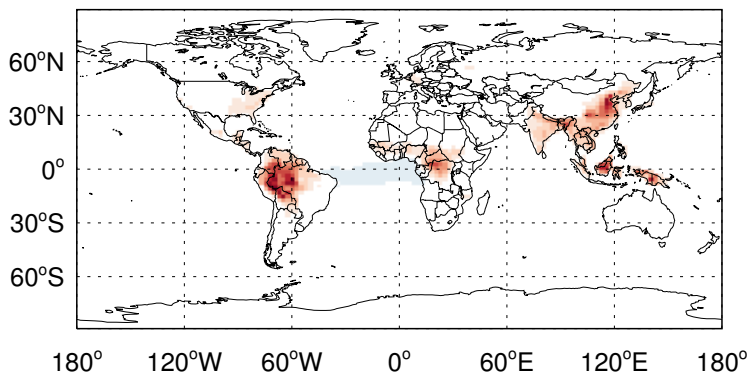

-104.510 -52.255 0.000 52.255 104.510 ppbv

old\_tagCO - full\_chemistry  
CO- Diff @ 500 hPa for Oct

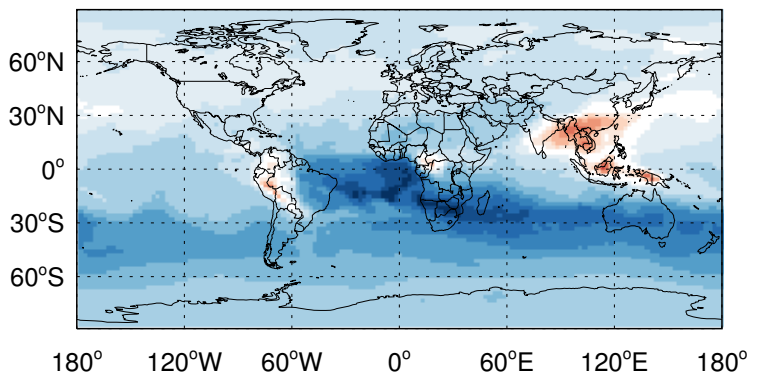

-10.805 -5.402 0.000 5.402 10.805 ppbv

# GEOS-Chem Difference Maps at surface and 500 hPa

new\_tagCO - full\_chemistry  
CO - Diff @ Surface for Oct

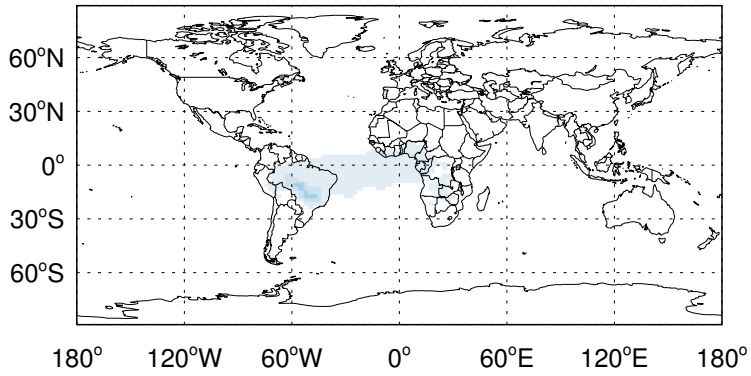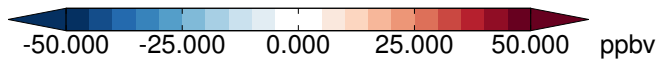

new\_tagCO - full\_chemistry  
CO- Diff @ 500 hPa for Oct

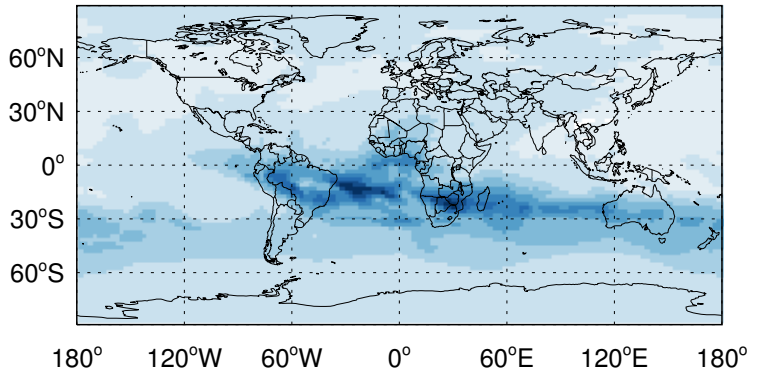

old\_tagCO - full\_chemistry  
CO - Diff @ Surface for Oct

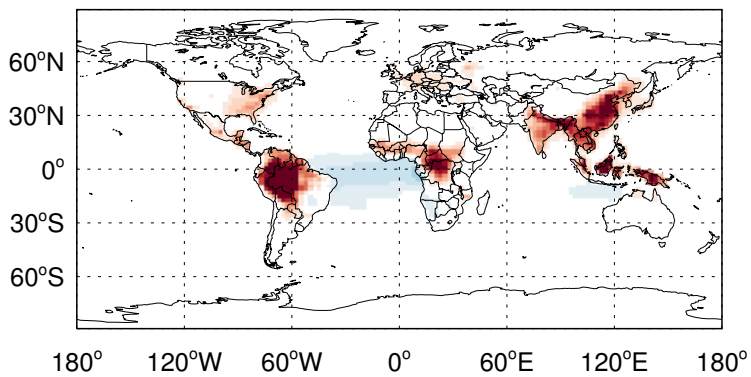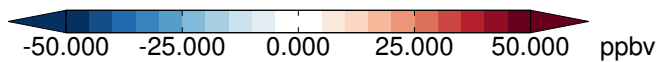

old\_tagCO - full\_chemistry  
CO- Diff @ 500 hPa for Oct

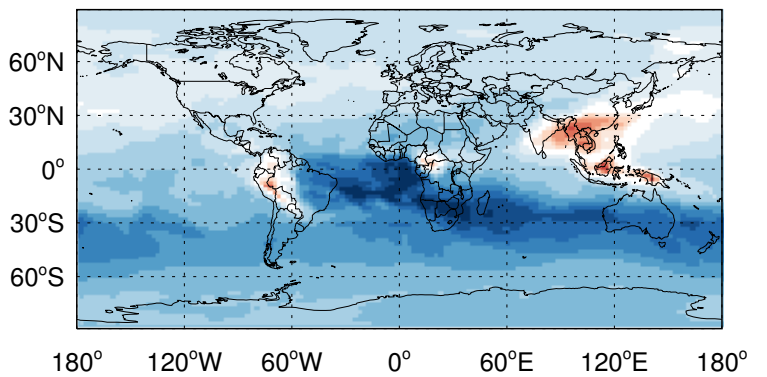

# GEOS-Chem Longitudinal Difference Profiles

new\_tagCO - full\_chemistry  
CO - Diff along 0S for Apr

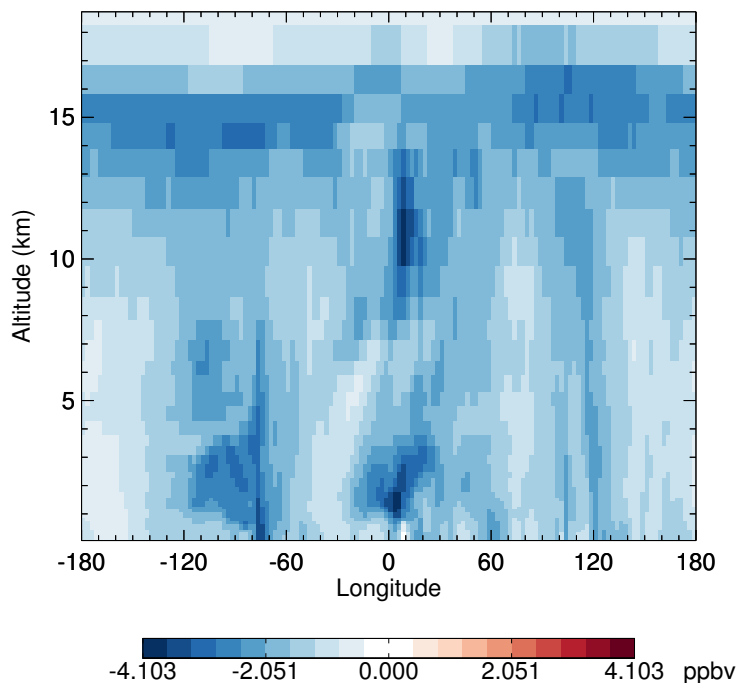

new\_tagCO - full\_chemistry  
CO - Diff along 30N for Apr

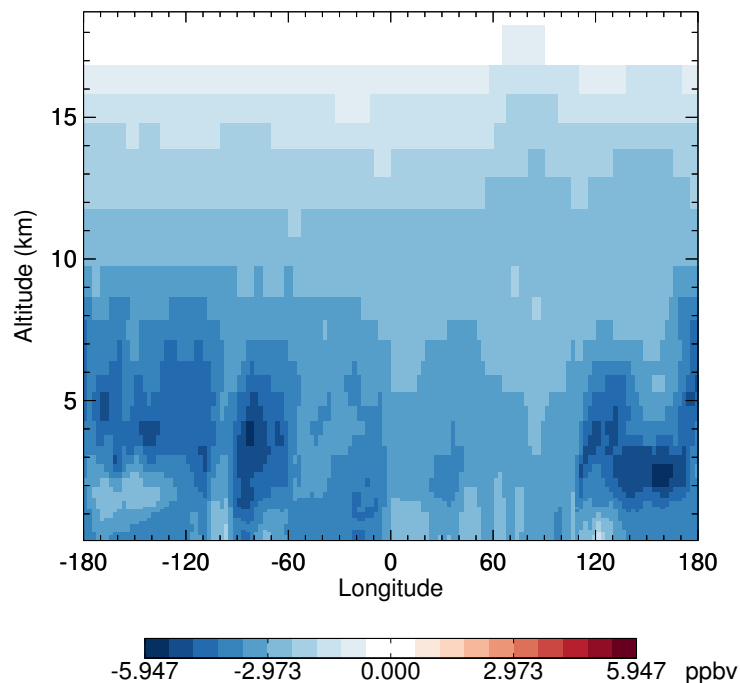

old\_tagCO - full\_chemistry  
CO - Diff along 0S for Apr

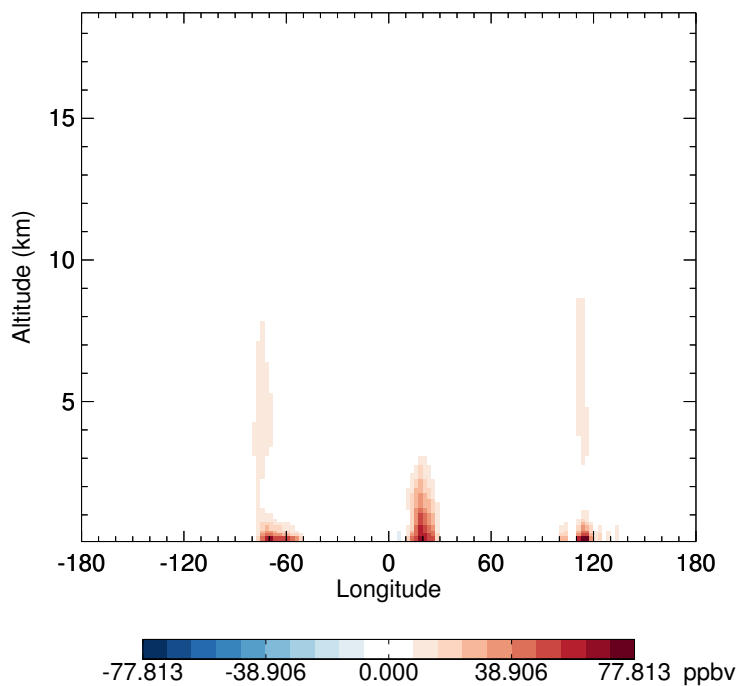

old\_tagCO - full\_chemistry  
CO - Diff along 30N for Apr

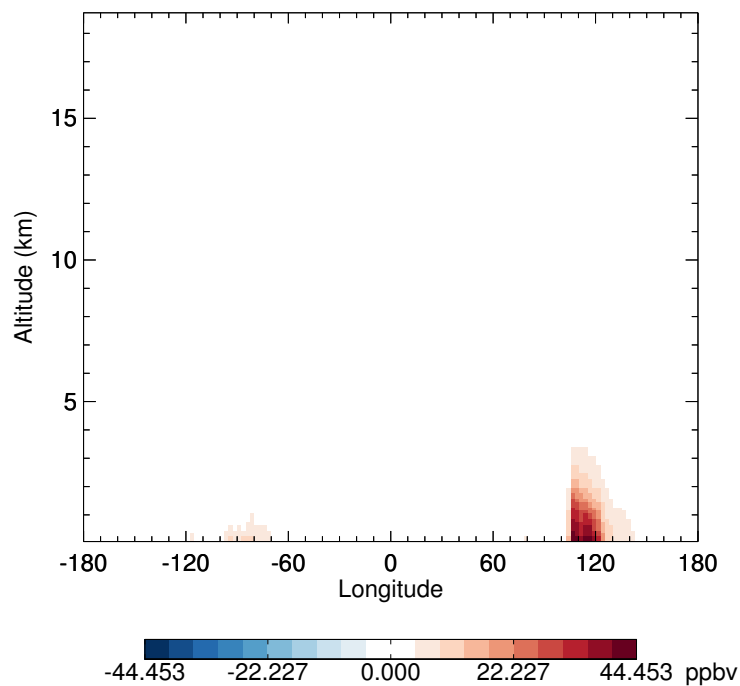

# GEOS-Chem Longitudinal Difference Profiles

new\_tagCO - full\_chemistry  
CO - Diff along 0S for Apr

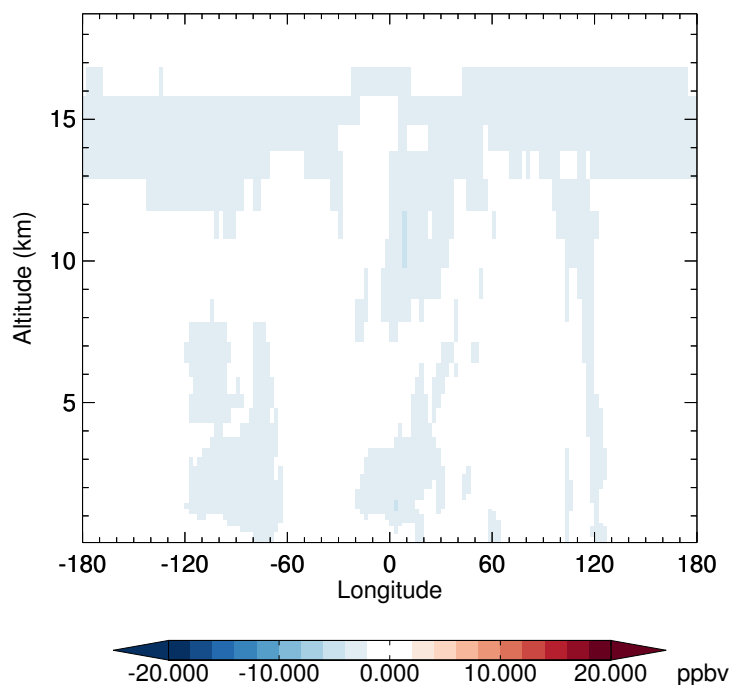

new\_tagCO - full\_chemistry  
CO - Diff along 30N for Apr

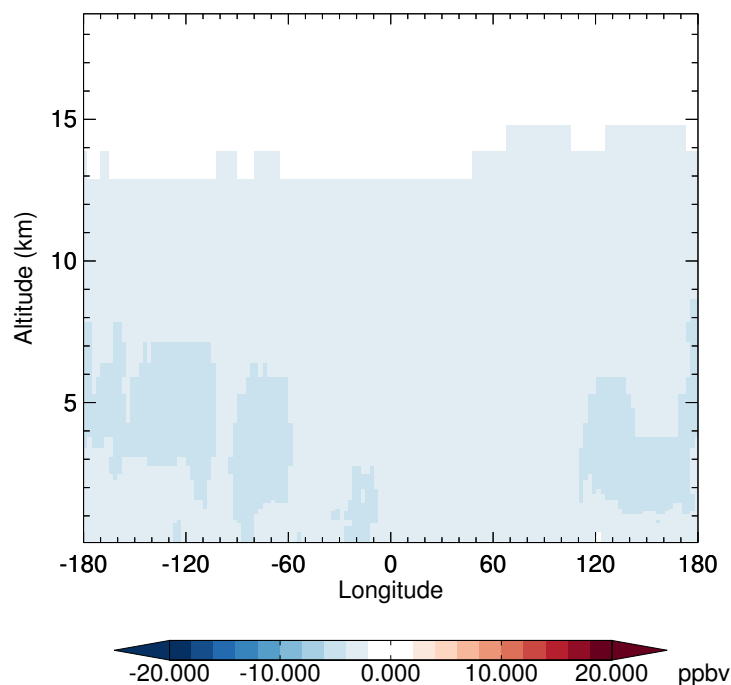

old\_tagCO - full\_chemistry  
CO - Diff along 0S for Apr

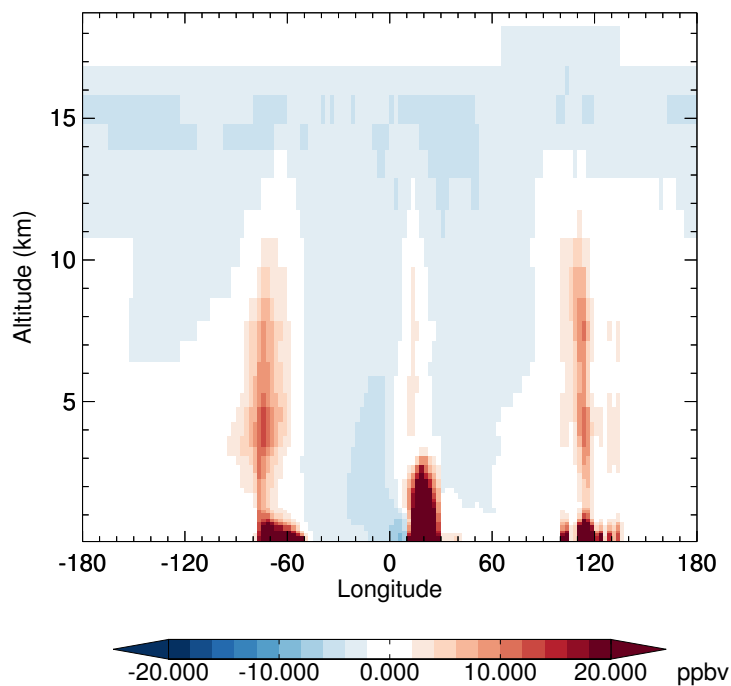

old\_tagCO - full\_chemistry  
CO - Diff along 30N for Apr

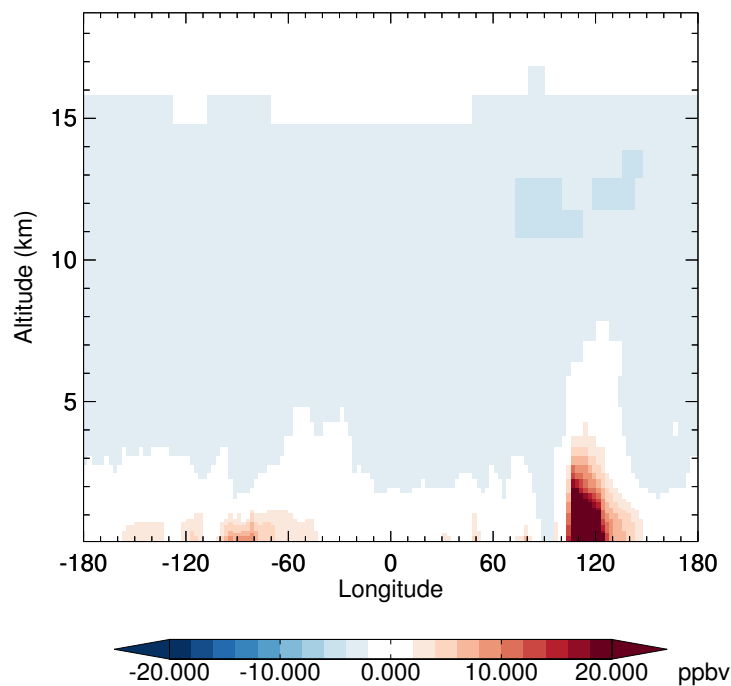

# GEOS-Chem Longitudinal Difference Profiles

new\_tagCO - full\_chemistry  
CO - Diff along 0S for Jan

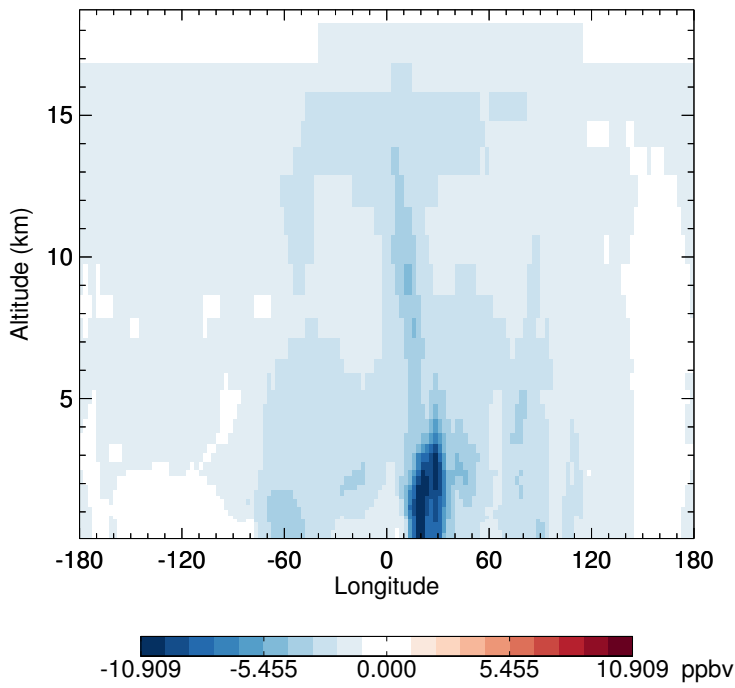

new\_tagCO - full\_chemistry  
CO - Diff along 30N for Jan

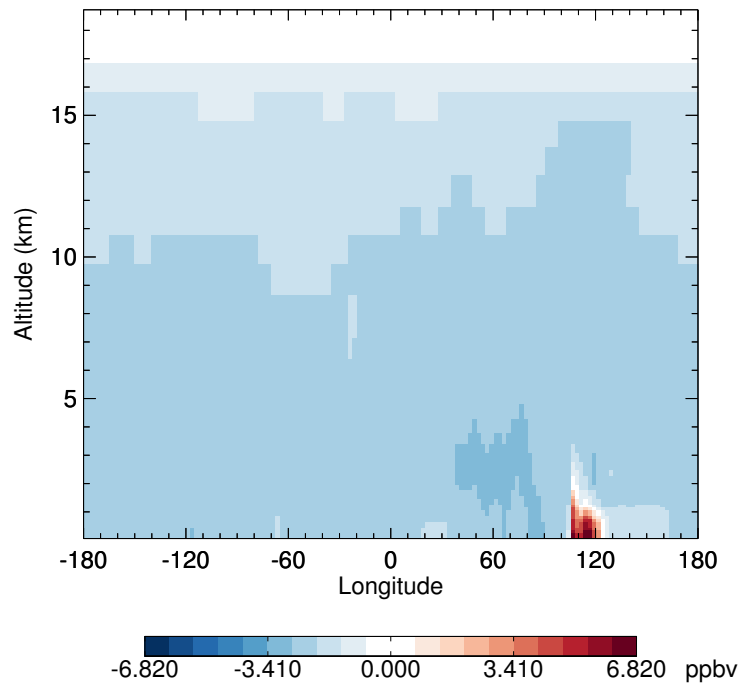

old\_tagCO - full\_chemistry  
CO - Diff along 0S for Jan

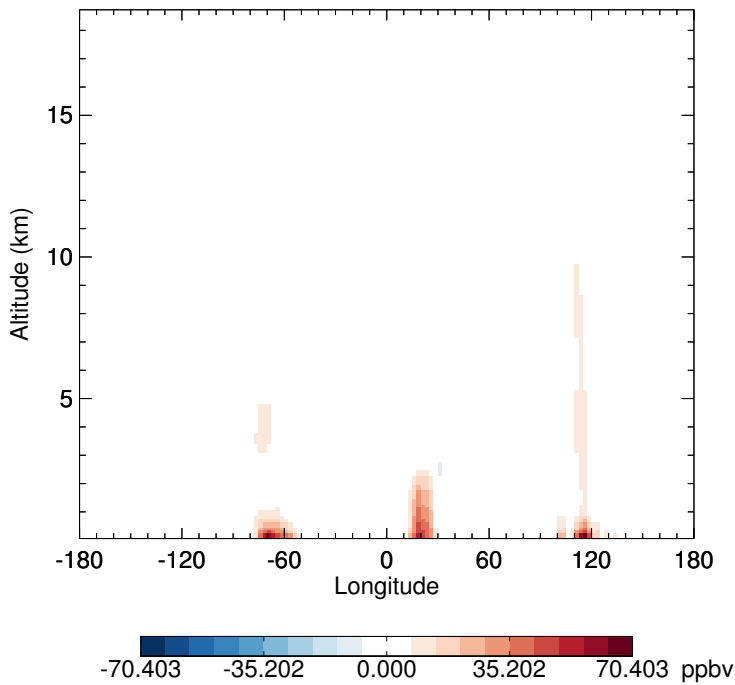

old\_tagCO - full\_chemistry  
CO - Diff along 30N for Jan

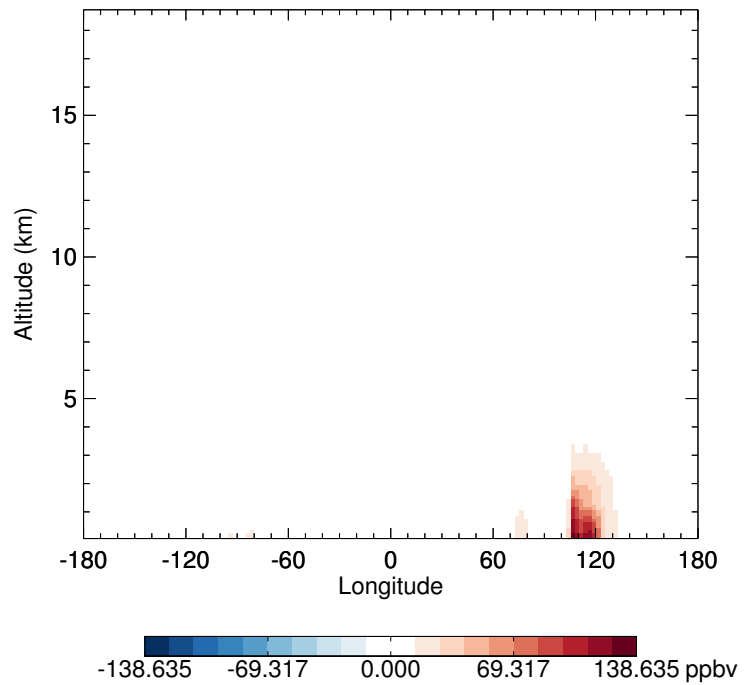

# GEOS-Chem Longitudinal Difference Profiles

new\_tagCO - full\_chemistry  
CO - Diff along 0S for Jan

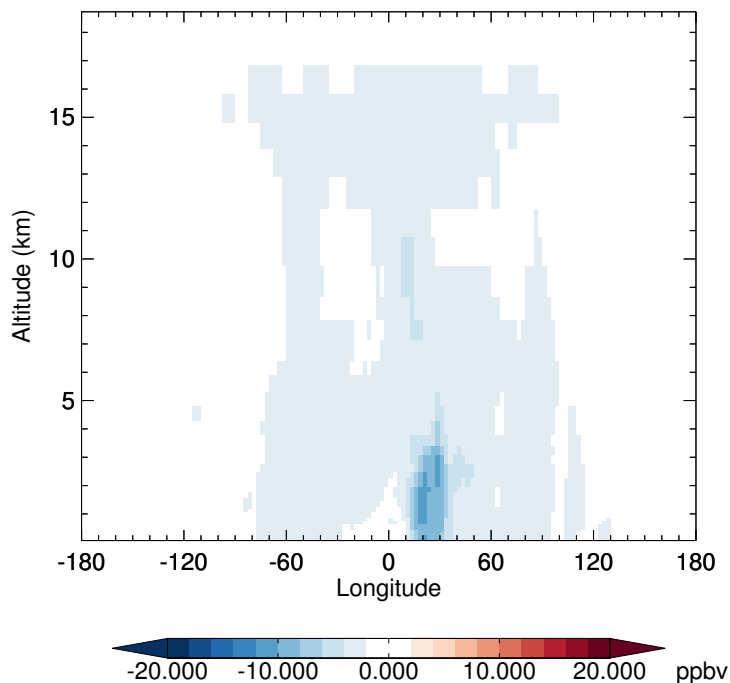

new\_tagCO - full\_chemistry  
CO - Diff along 30N for Jan

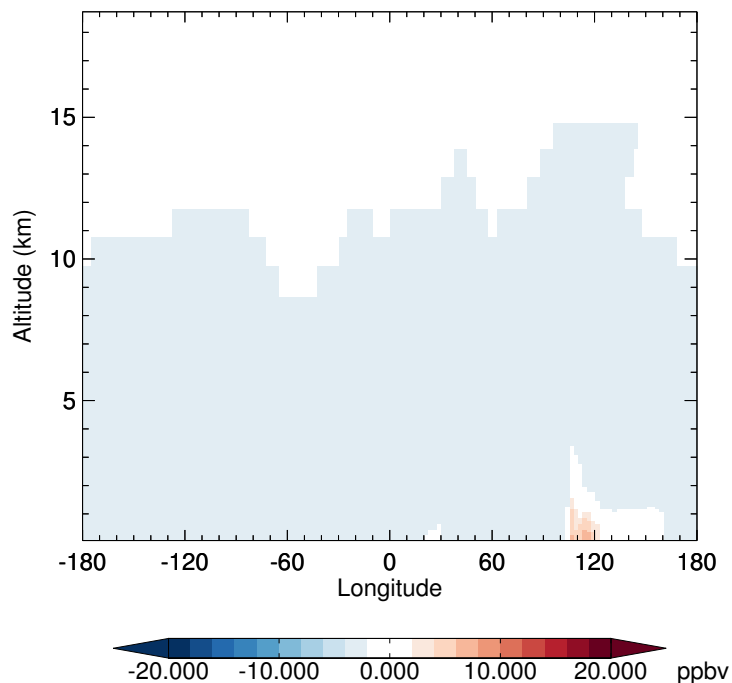

old\_tagCO - full\_chemistry  
CO - Diff along 0S for Jan

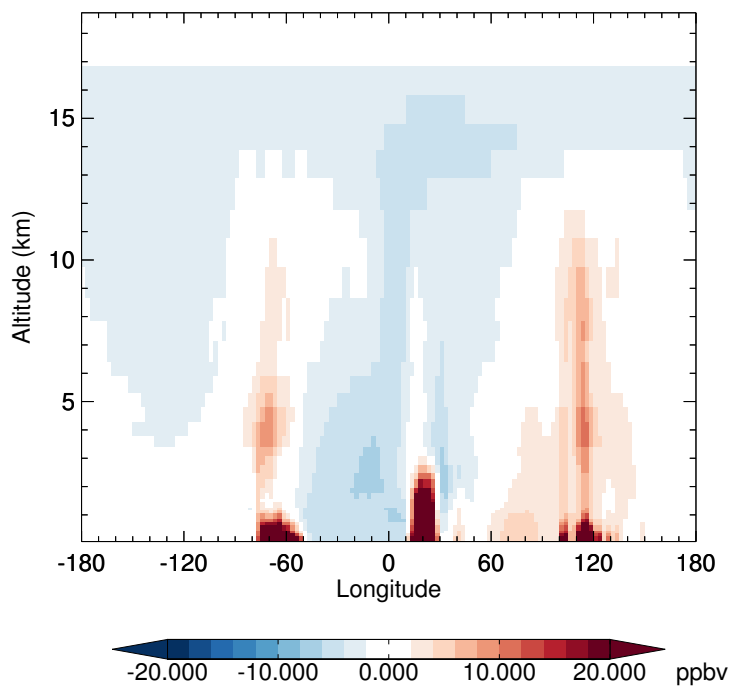

old\_tagCO - full\_chemistry  
CO - Diff along 30N for Jan

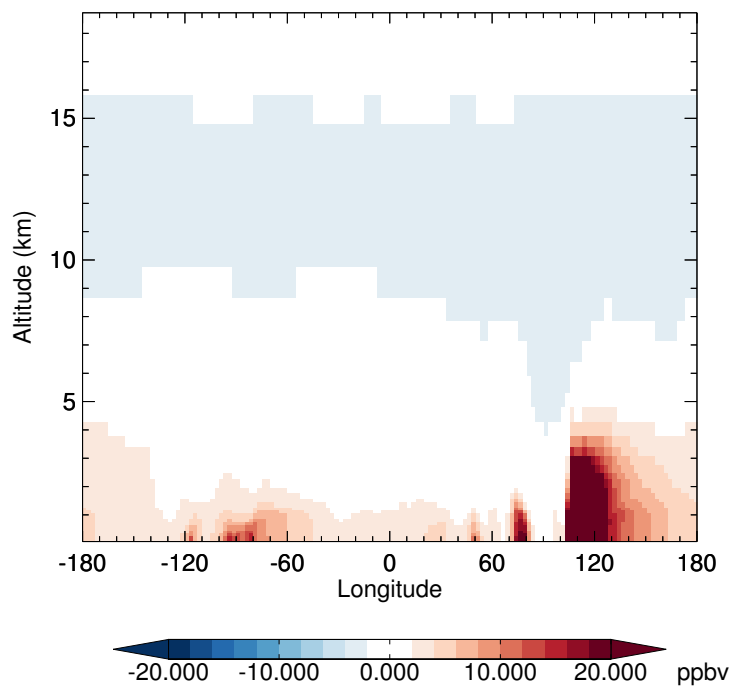

# GEOS-Chem Longitudinal Difference Profiles

new\_tagCO - full\_chemistry  
CO - Diff along 0S for Jul

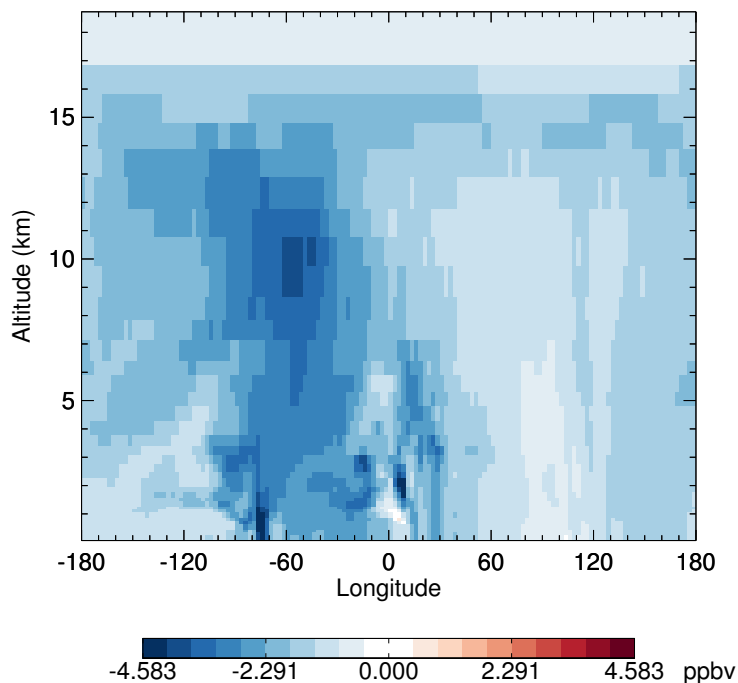

new\_tagCO - full\_chemistry  
CO - Diff along 30N for Jul

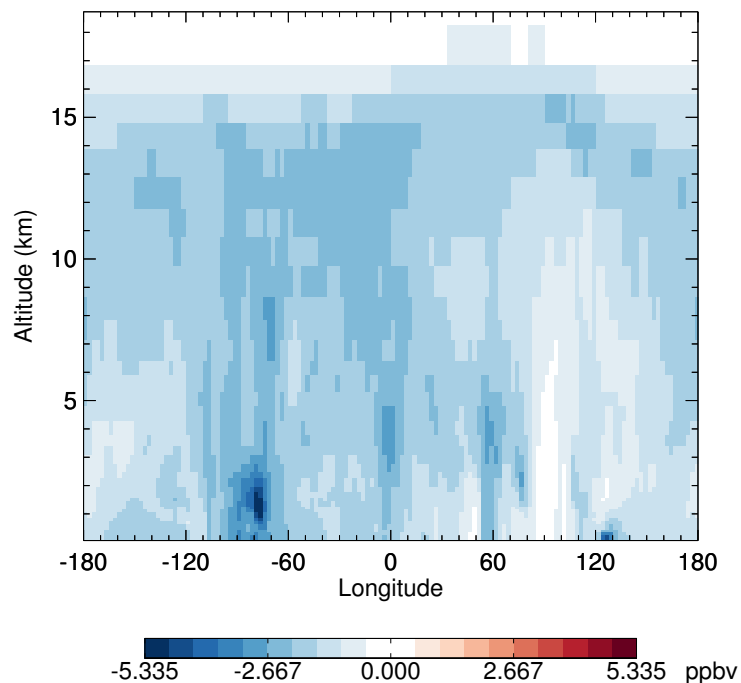

old\_tagCO - full\_chemistry  
CO - Diff along 0S for Jul

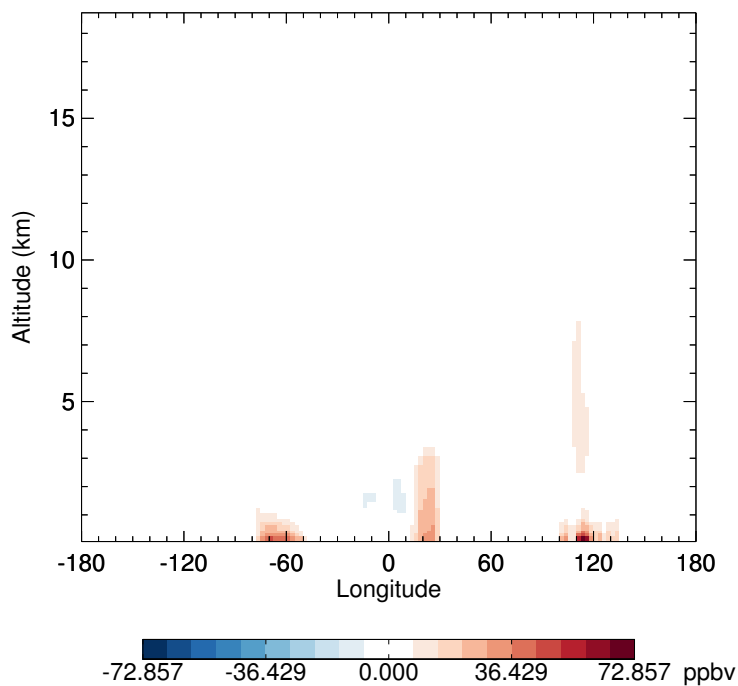

old\_tagCO - full\_chemistry  
CO - Diff along 30N for Jul

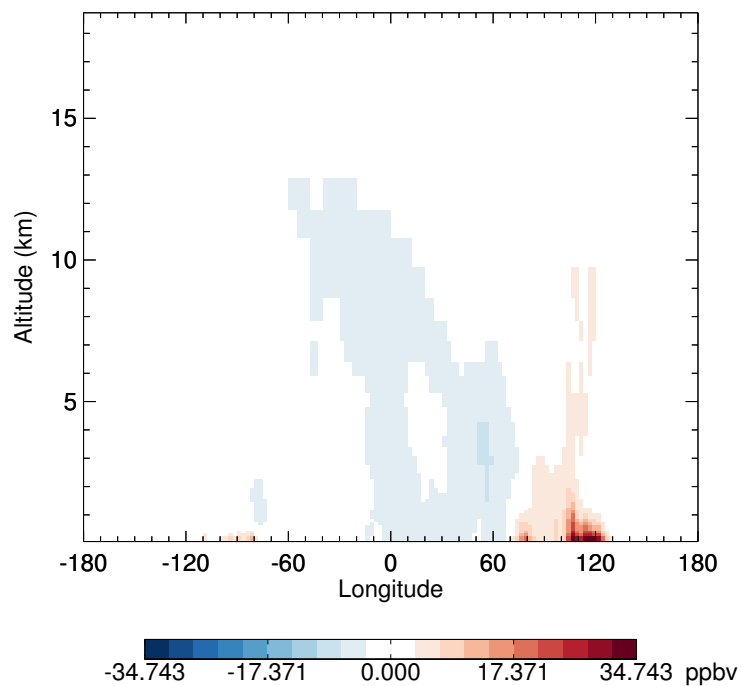

# GEOS-Chem Longitudinal Difference Profiles

new\_tagCO - full\_chemistry  
CO - Diff along 0S for Jul

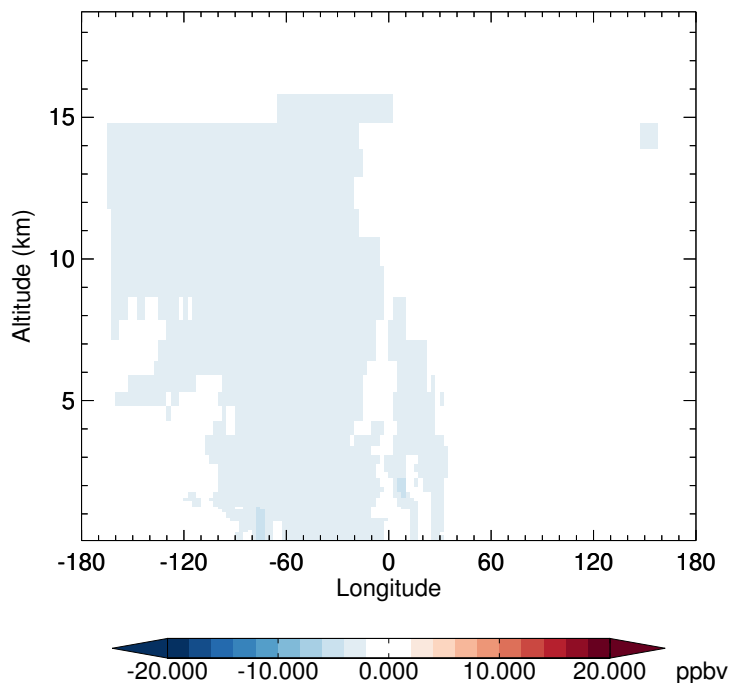

new\_tagCO - full\_chemistry  
CO - Diff along 30N for Jul

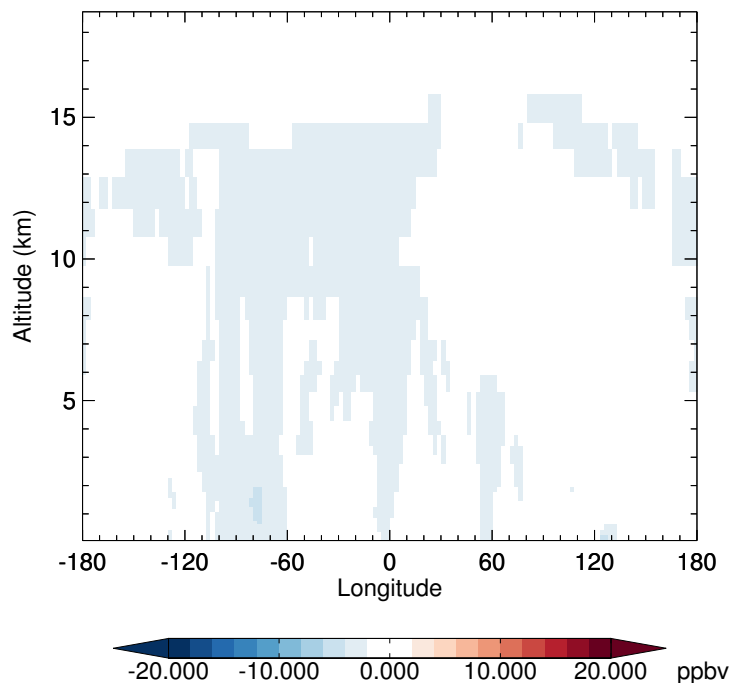

old\_tagCO - full\_chemistry  
CO - Diff along 0S for Jul

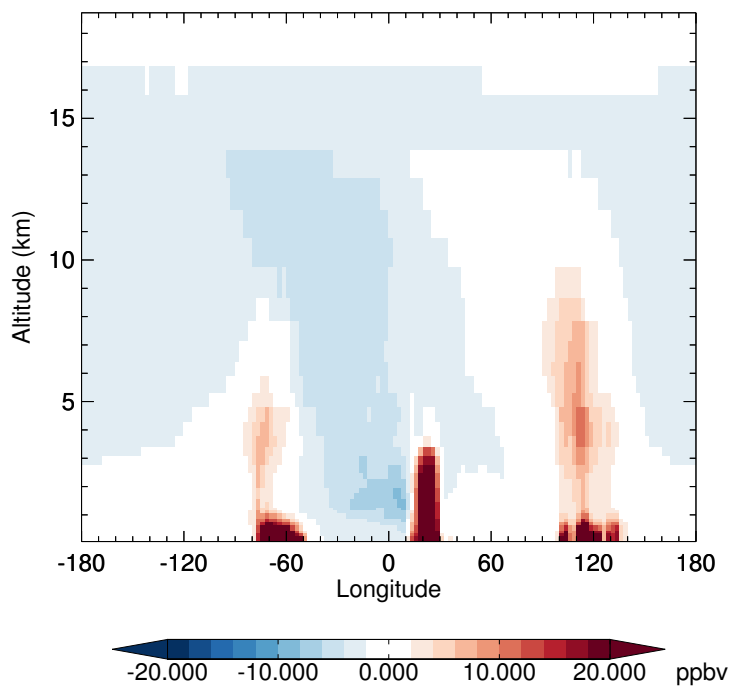

old\_tagCO - full\_chemistry  
CO - Diff along 30N for Jul

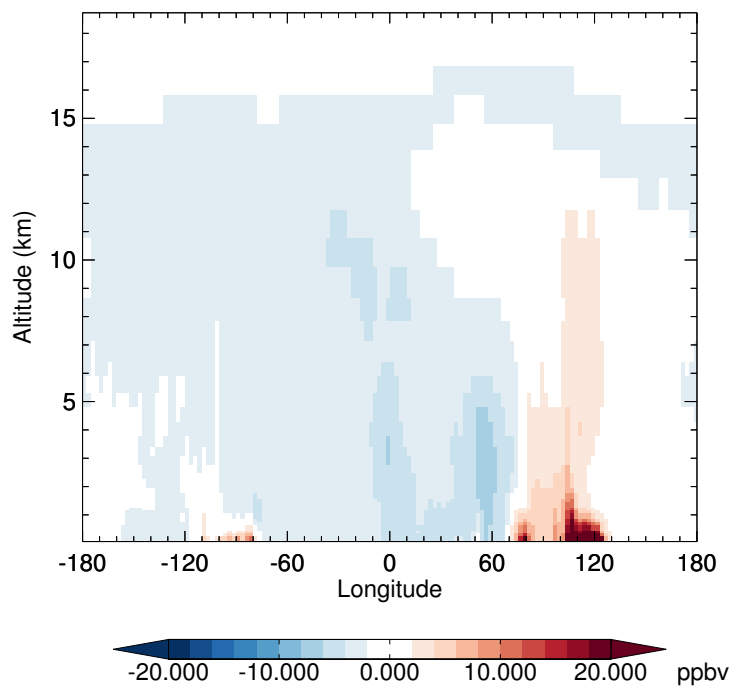

# GEOS-Chem Longitudinal Difference Profiles

new\_tagCO - full\_chemistry  
CO - Diff along 0S for Oct

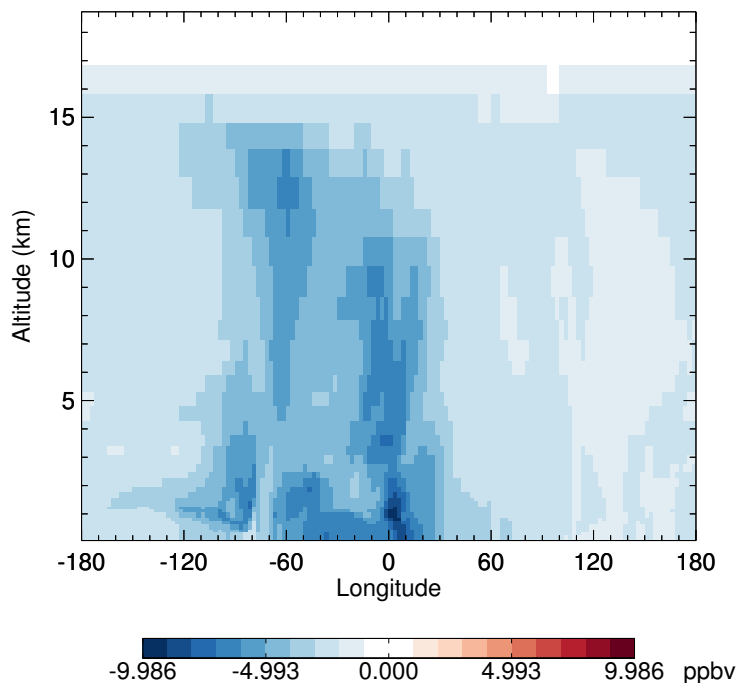

new\_tagCO - full\_chemistry  
CO - Diff along 30N for Oct

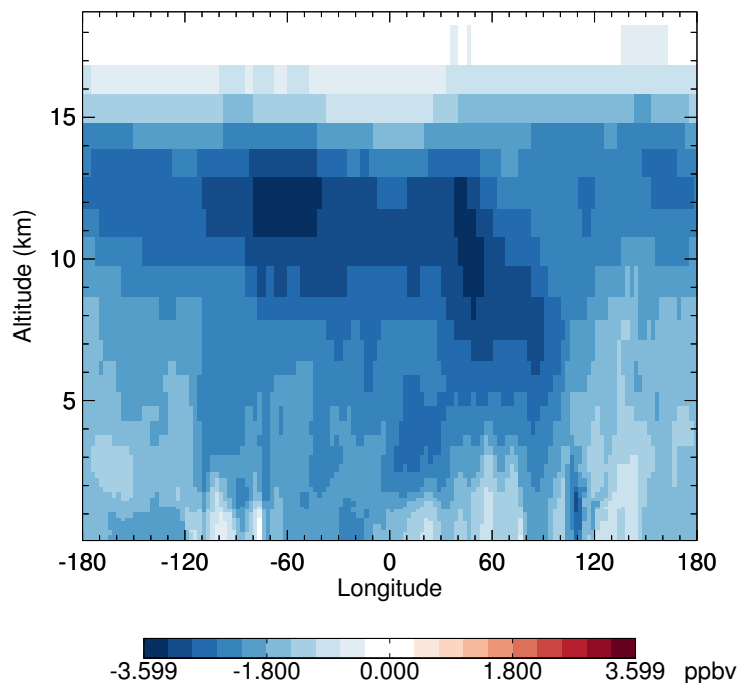

old\_tagCO - full\_chemistry  
CO - Diff along 0S for Oct

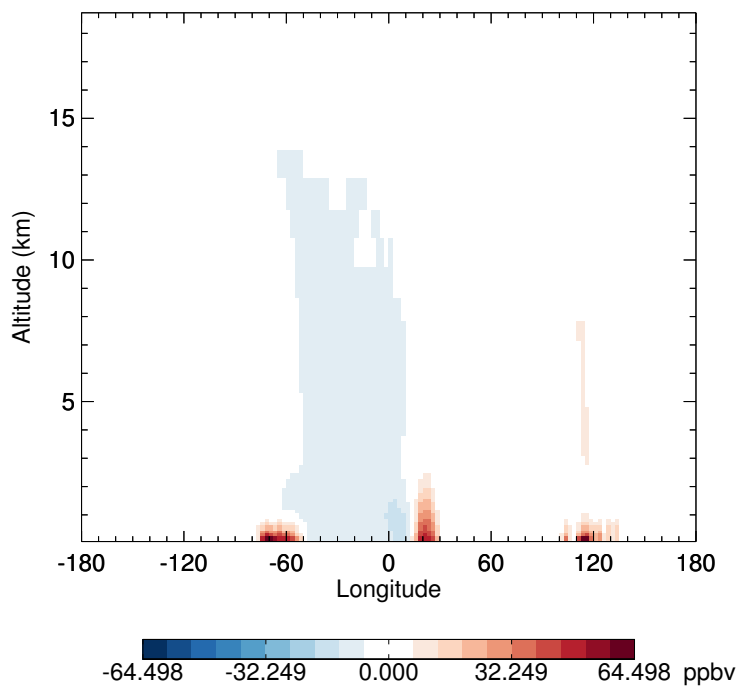

old\_tagCO - full\_chemistry  
CO - Diff along 30N for Oct

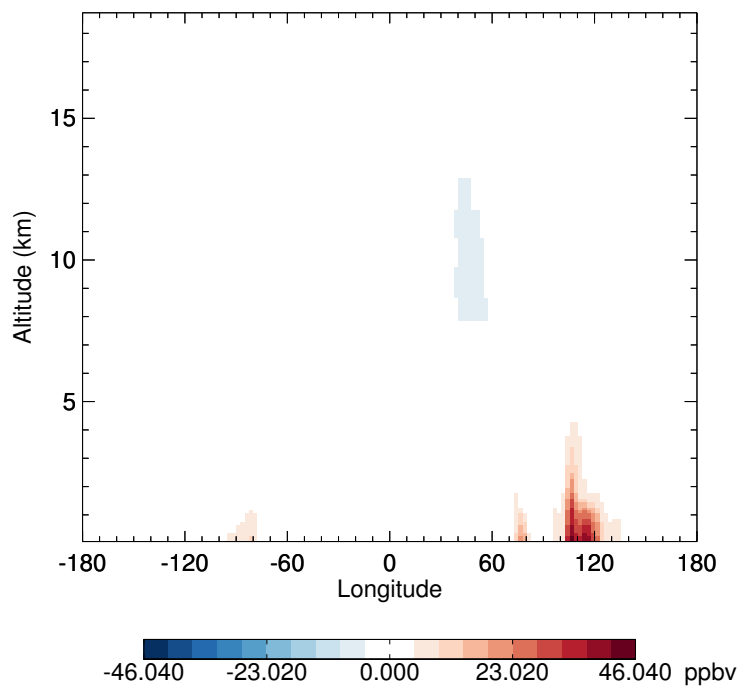

# GEOS-Chem Longitudinal Difference Profiles

new\_tagCO - full\_chemistry  
CO - Diff along 0S for Oct

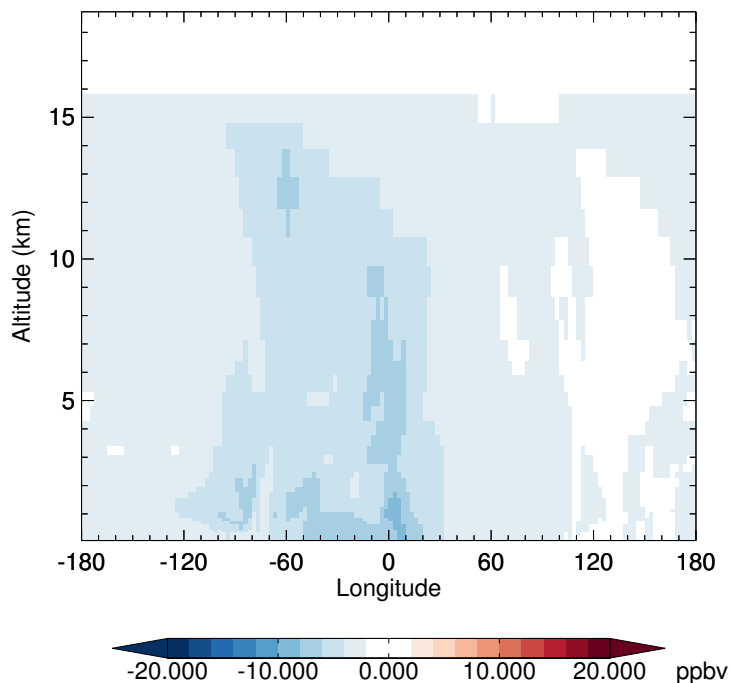

new\_tagCO - full\_chemistry  
CO - Diff along 30N for Oct

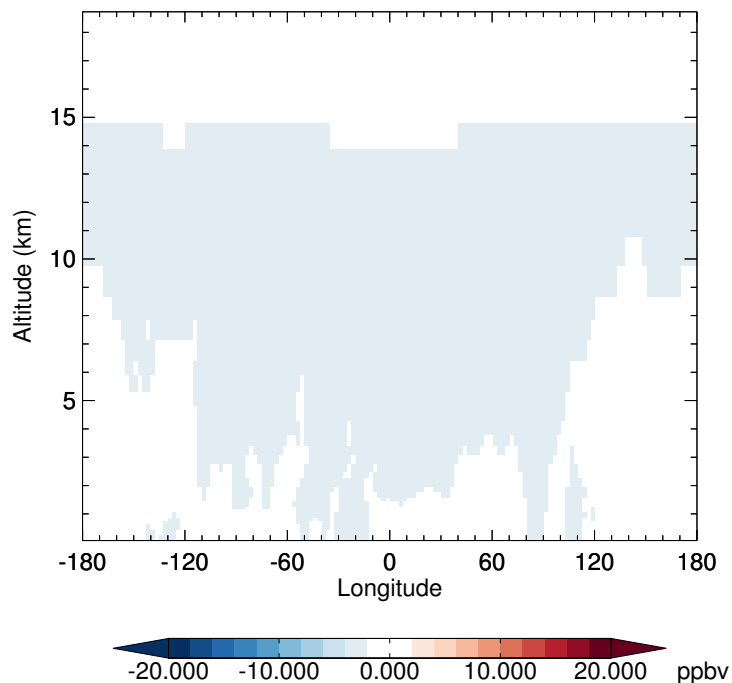

old\_tagCO - full\_chemistry  
CO - Diff along 0S for Oct

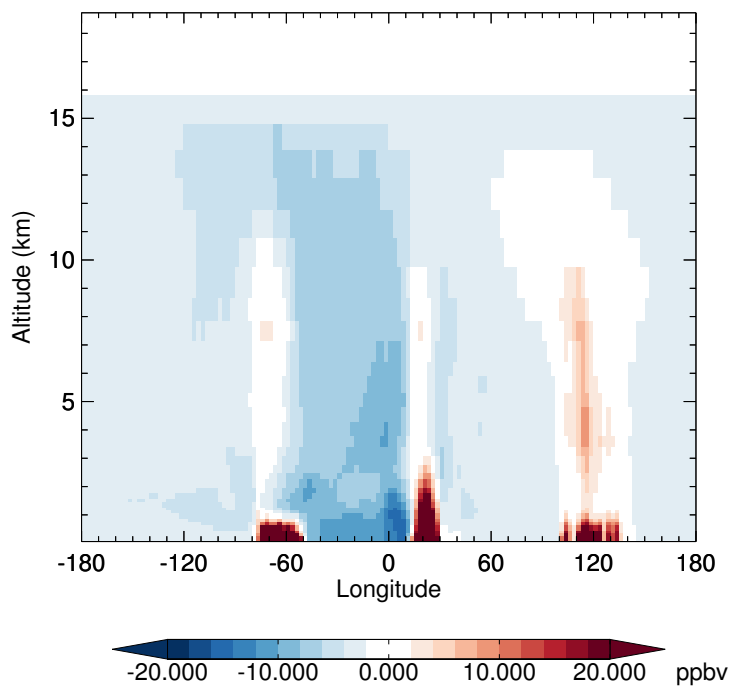

old\_tagCO - full\_chemistry  
CO - Diff along 30N for Oct

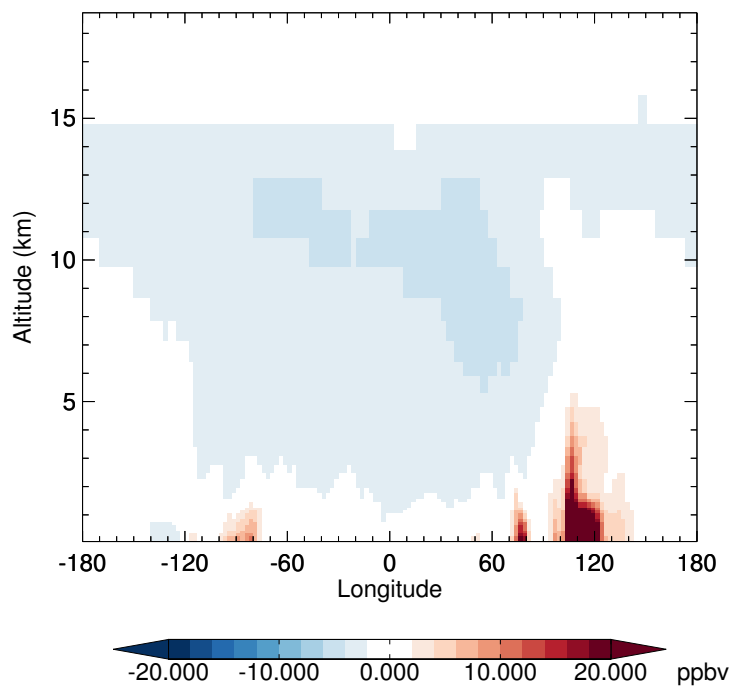

# GEOS-Chem Latitudinal Difference Profiles

new\_tagCO - full\_chemistry  
CO - Diff along -60W for Apr

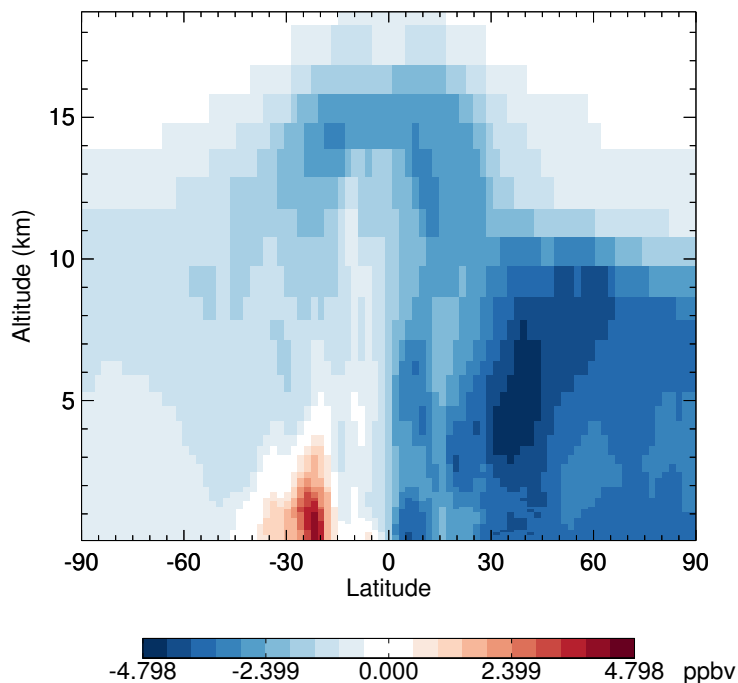

new\_tagCO - full\_chemistry  
CO - Diff along 0E for Apr

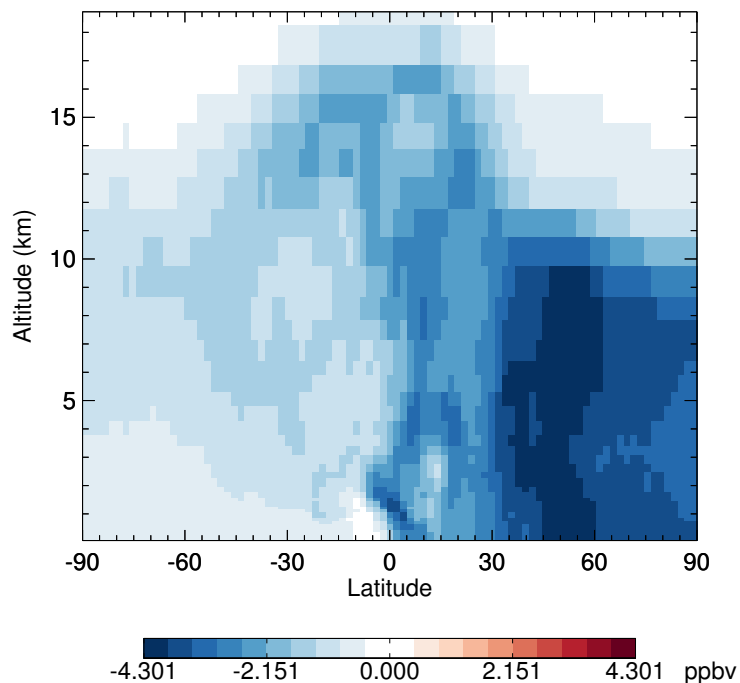

old\_tagCO - full\_chemistry  
CO - Diff along -60W for Apr

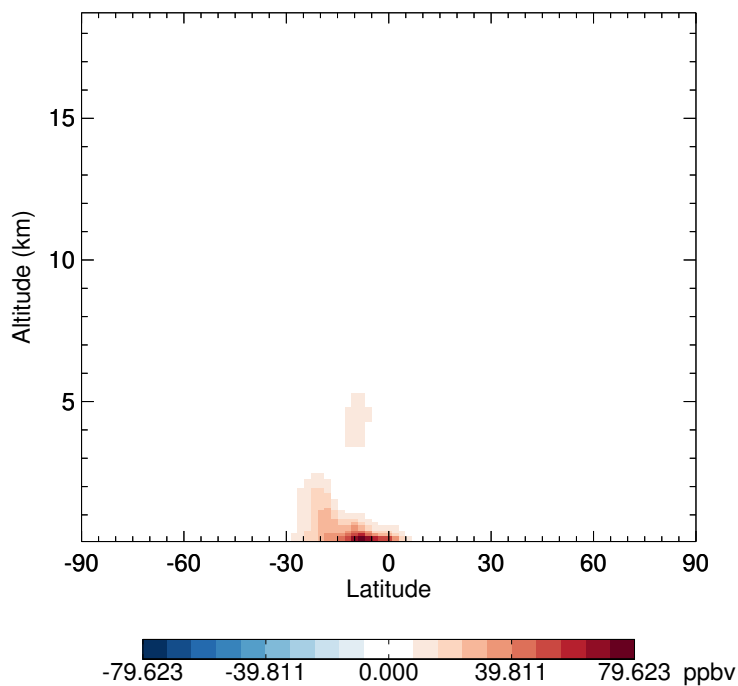

old\_tagCO - full\_chemistry  
CO - Diff along 0E for Apr

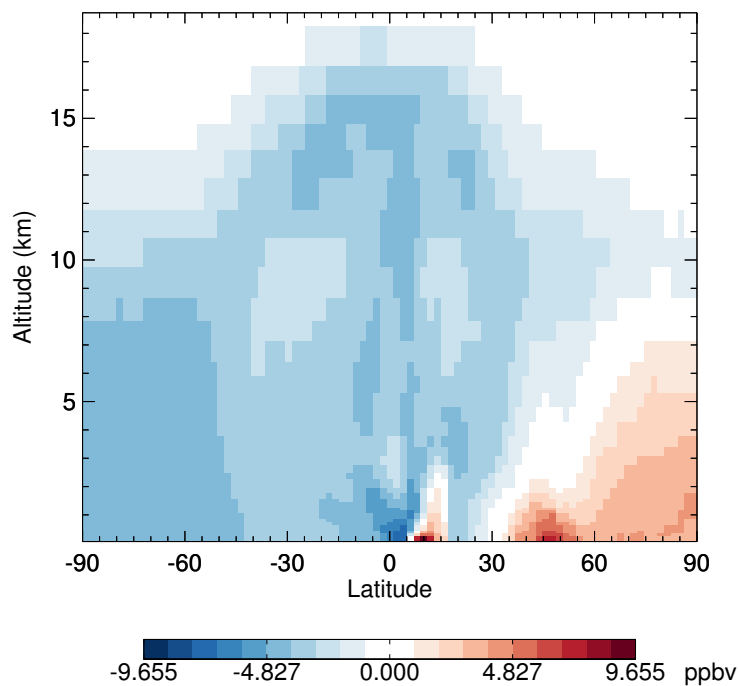

## GEOS-Chem Latitudinal Difference Profiles

new\_tagCO - full\_chemistry  
CO - Diff along -60W for Apr

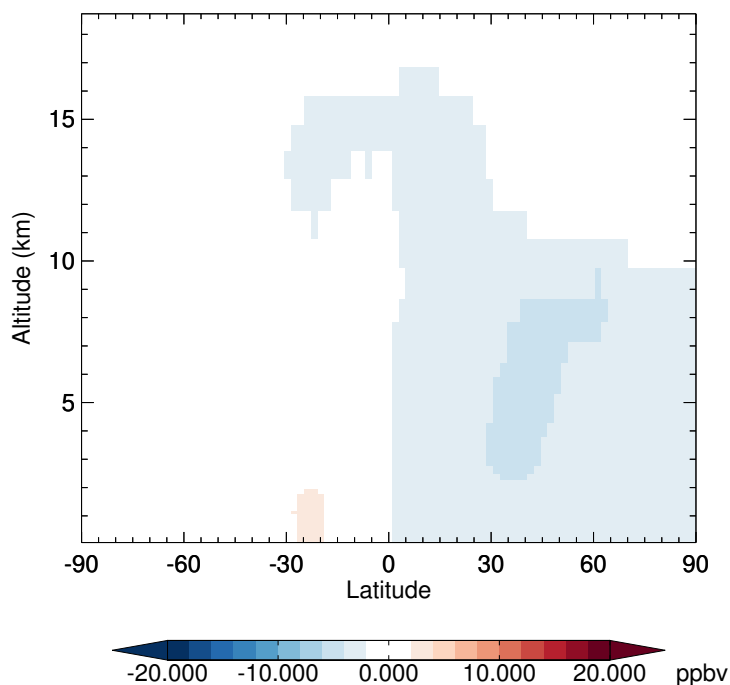

new\_tagCO - full\_chemistry  
CO - Diff along 0E for Apr

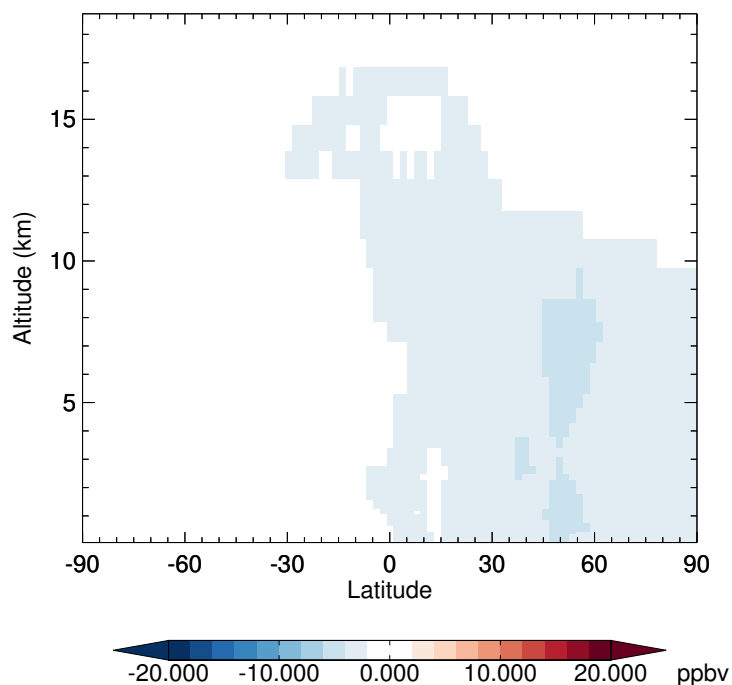

old\_tagCO - full\_chemistry  
CO - Diff along -60W for Apr

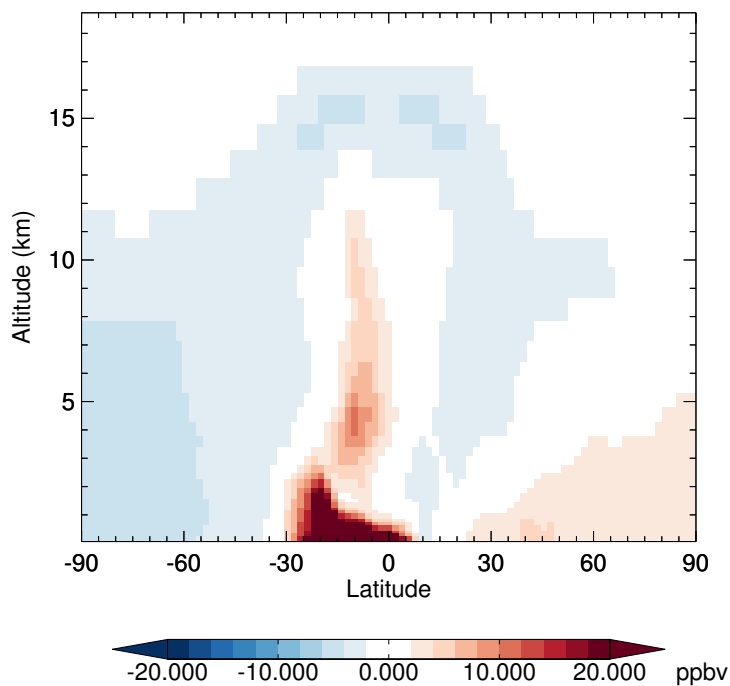

old\_tagCO - full\_chemistry  
CO - Diff along 0E for Apr

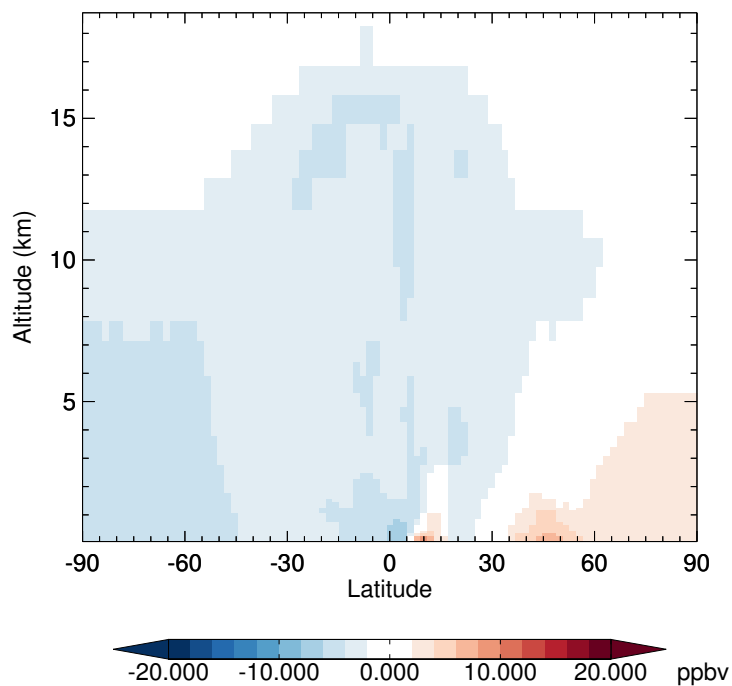

## GEOS-Chem Latitudinal Difference Profiles

new\_tagCO - full\_chemistry  
CO - Diff along -60W for Jan

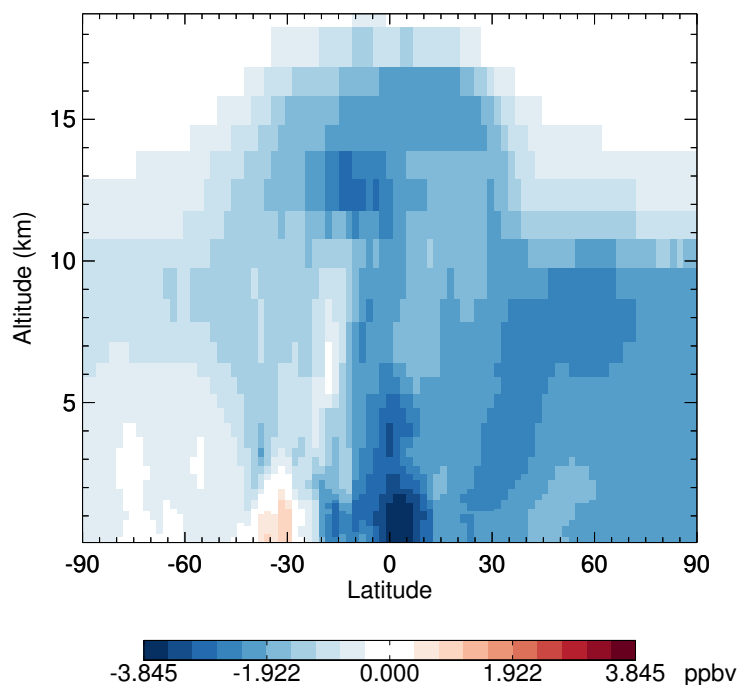

new\_tagCO - full\_chemistry  
CO - Diff along 0E for Jan

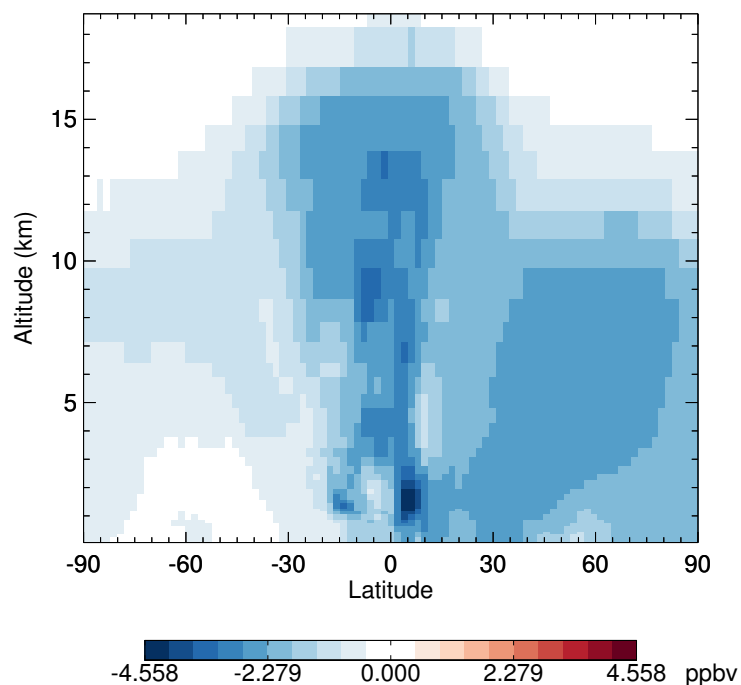

old\_tagCO - full\_chemistry  
CO - Diff along -60W for Jan

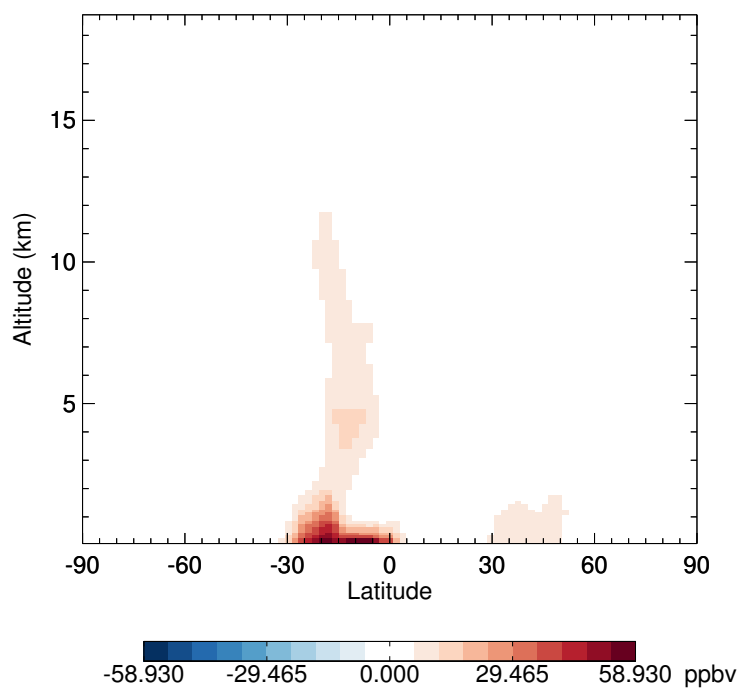

old\_tagCO - full\_chemistry  
CO - Diff along 0E for Jan

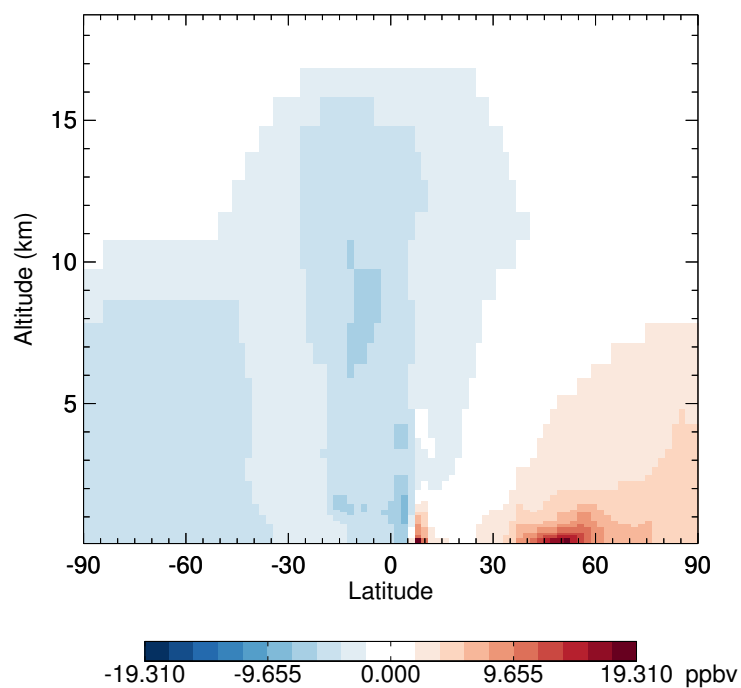

## GEOS-Chem Latitudinal Difference Profiles

new\_tagCO - full\_chemistry  
CO - Diff along -60W for Jan

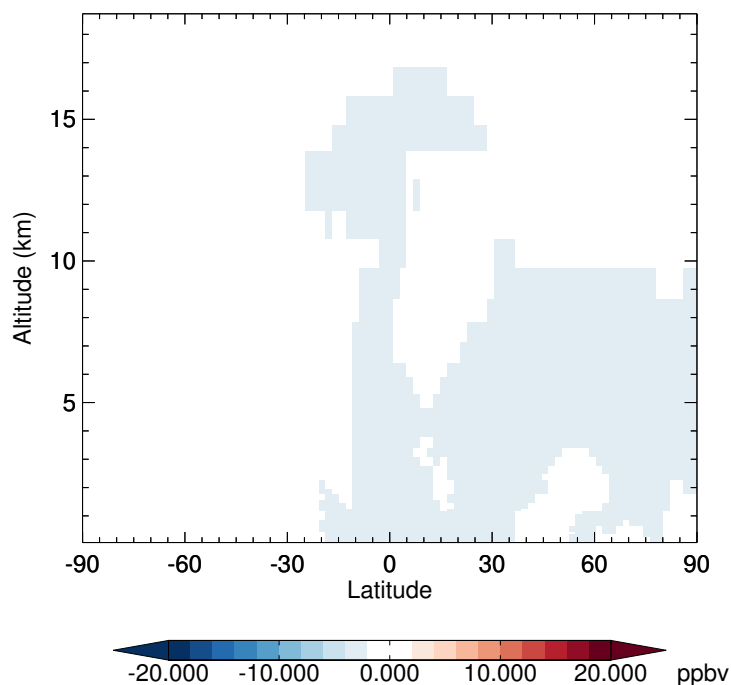

new\_tagCO - full\_chemistry  
CO - Diff along 0E for Jan

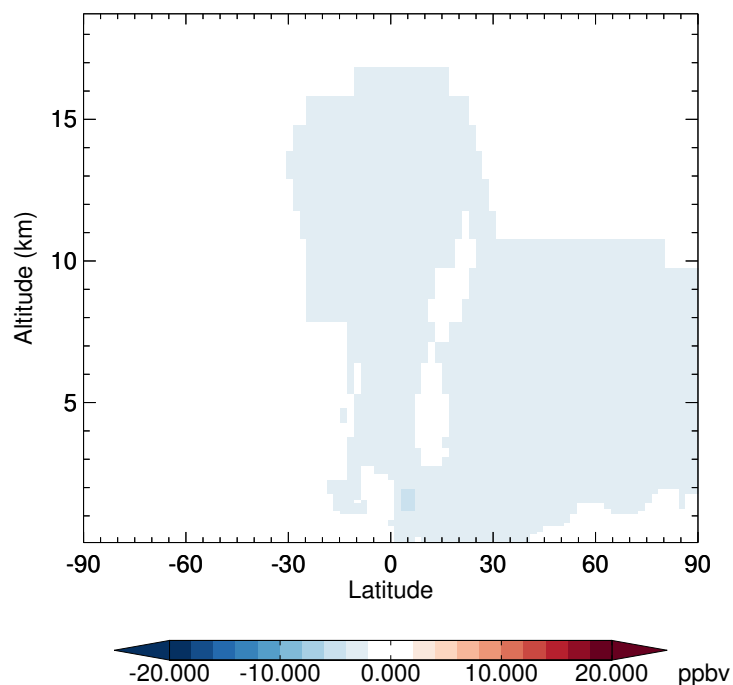

old\_tagCO - full\_chemistry  
CO - Diff along -60W for Jan

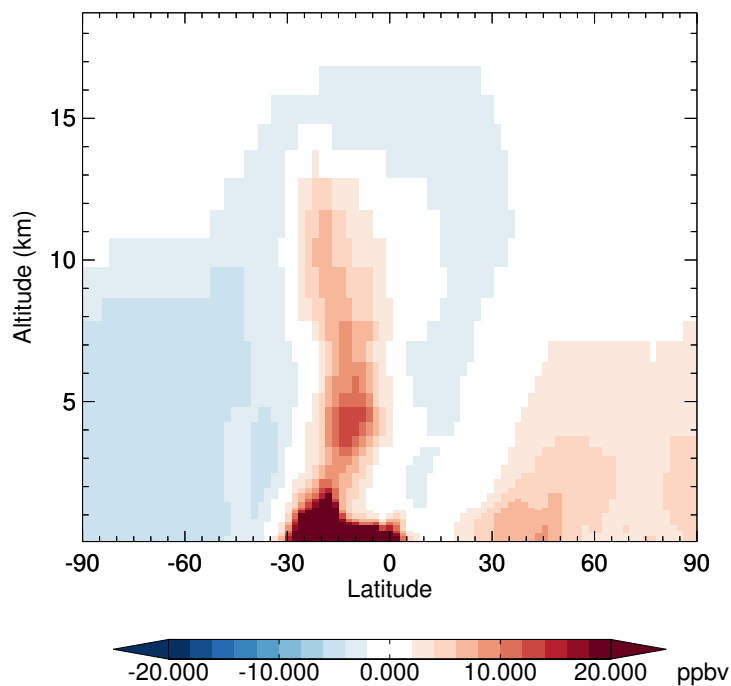

old\_tagCO - full\_chemistry  
CO - Diff along 0E for Jan

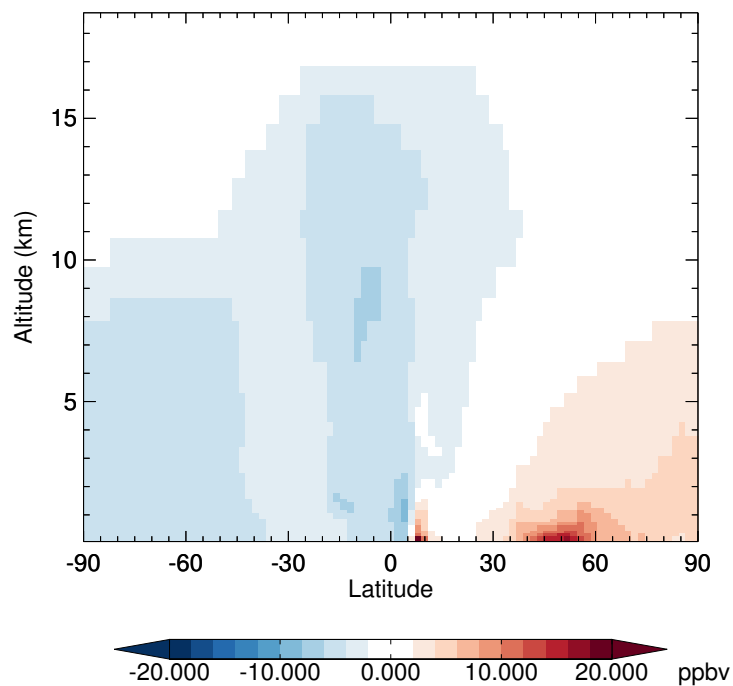

# GEOS-Chem Latitudinal Difference Profiles

new\_tagCO - full\_chemistry

CO - Diff along -60W for Jul

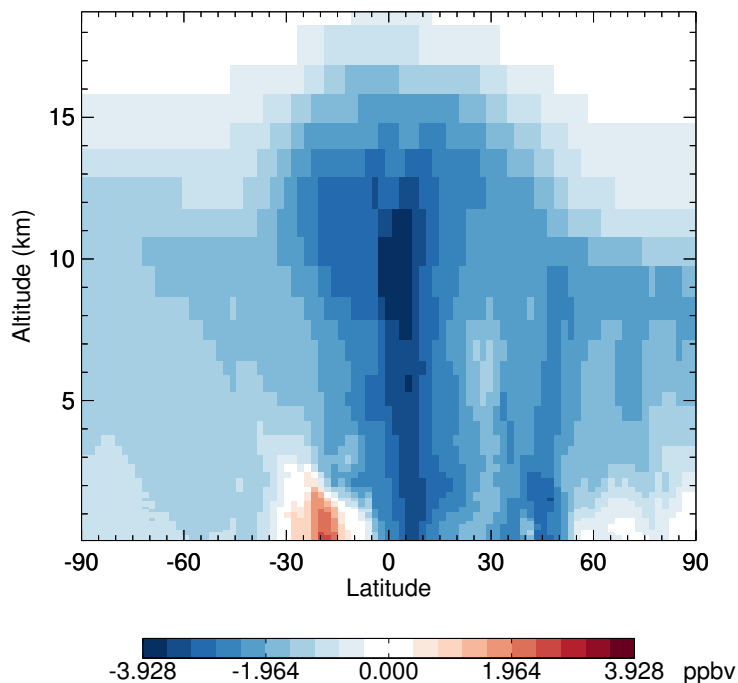

new\_tagCO - full\_chemistry

CO - Diff along 0E for Jul

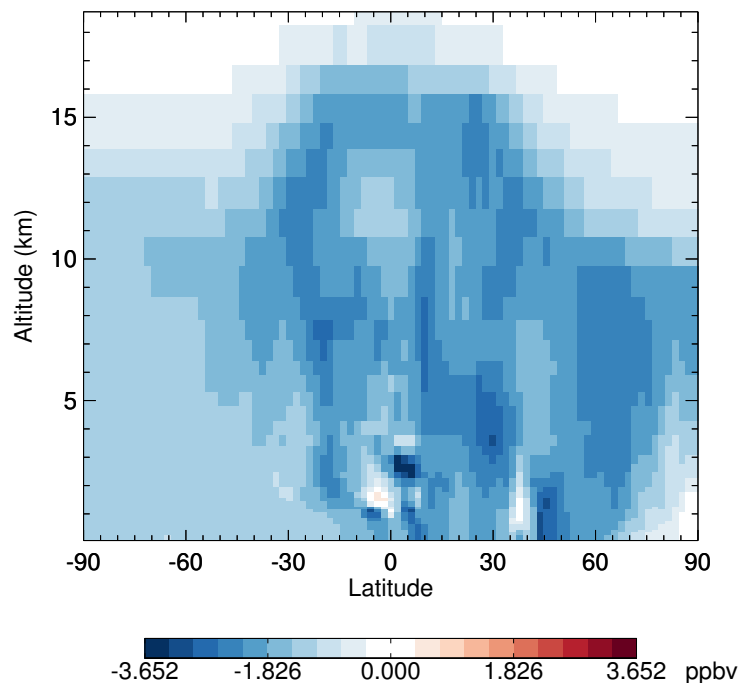

old\_tagCO - full\_chemistry

CO - Diff along -60W for Jul

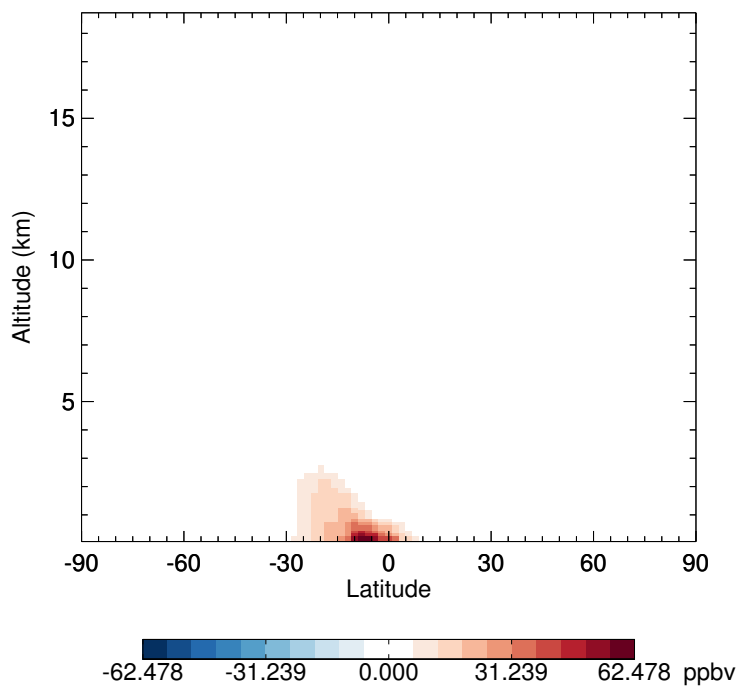

old\_tagCO - full\_chemistry

CO - Diff along 0E for Jul

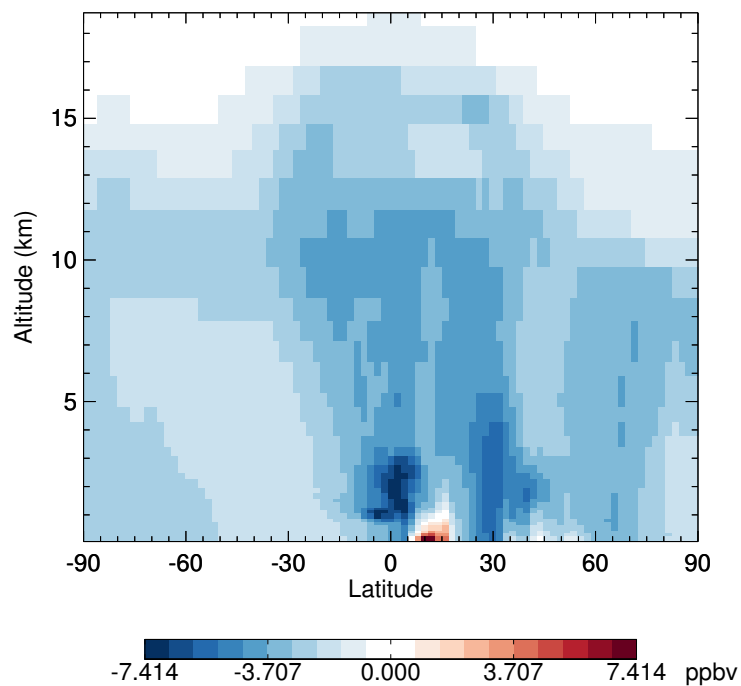

## GEOS-Chem Latitudinal Difference Profiles

new\_tagCO - full\_chemistry  
CO - Diff along -60W for Jul

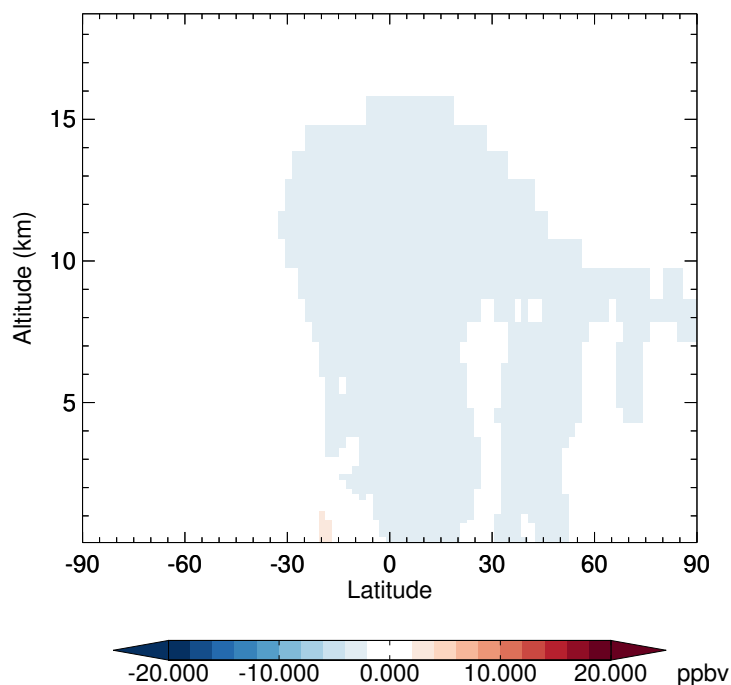

new\_tagCO - full\_chemistry  
CO - Diff along 0E for Jul

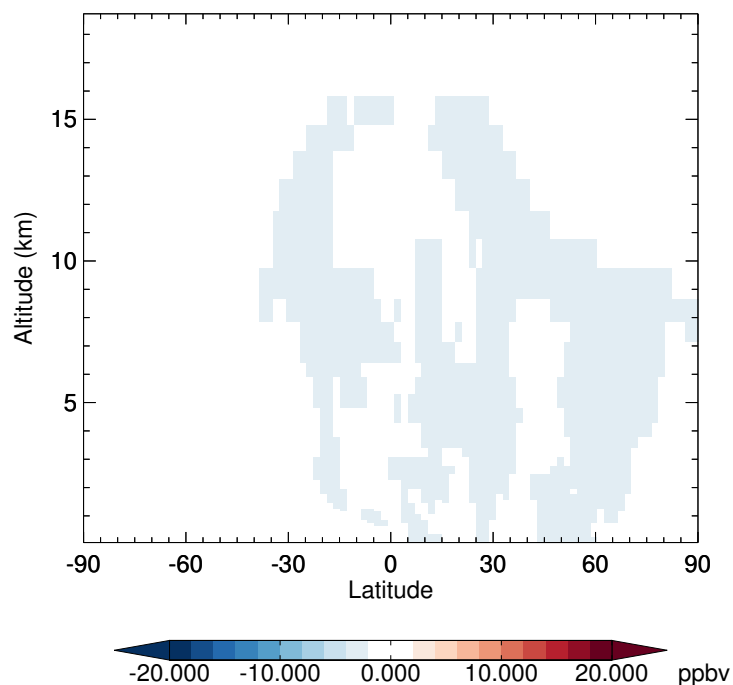

old\_tagCO - full\_chemistry  
CO - Diff along -60W for Jul

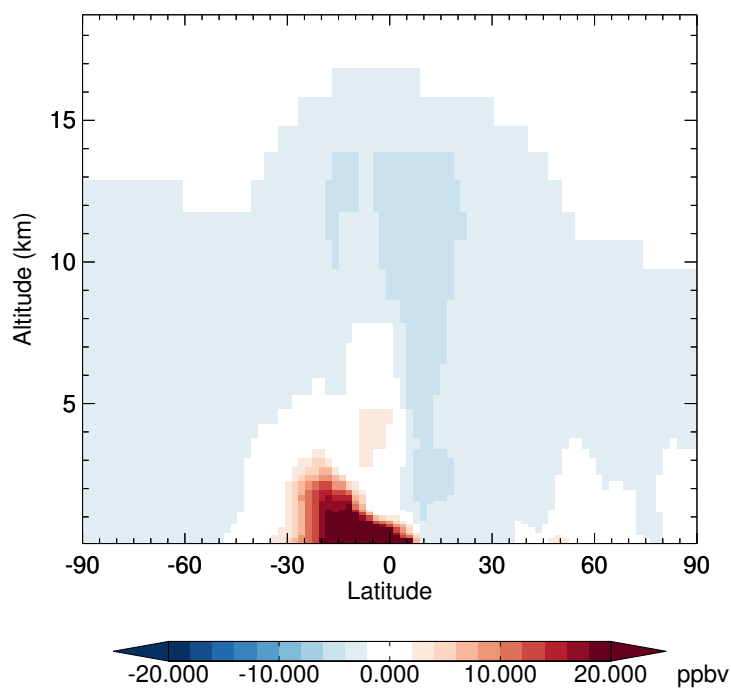

old\_tagCO - full\_chemistry  
CO - Diff along 0E for Jul

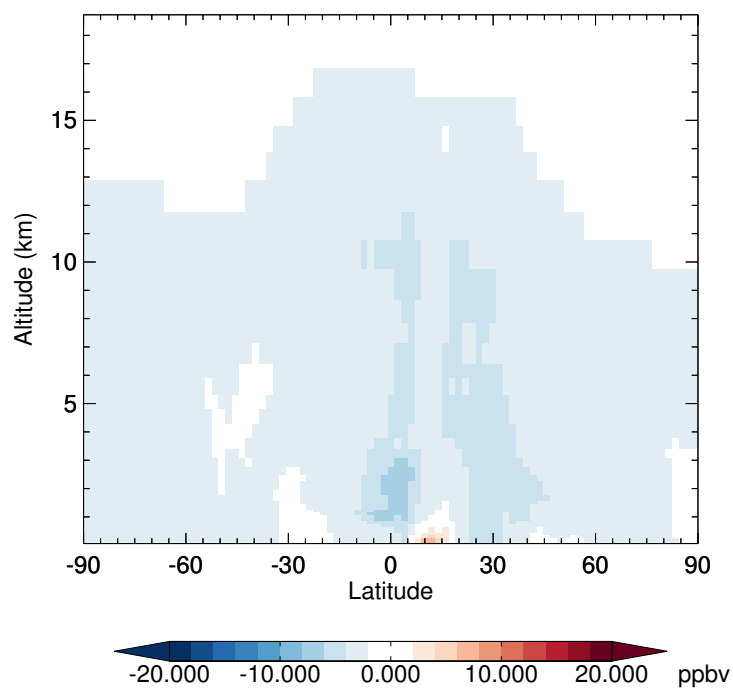

# GEOS-Chem Latitudinal Difference Profiles

new\_tagCO - full\_chemistry  
CO - Diff along -60W for Oct

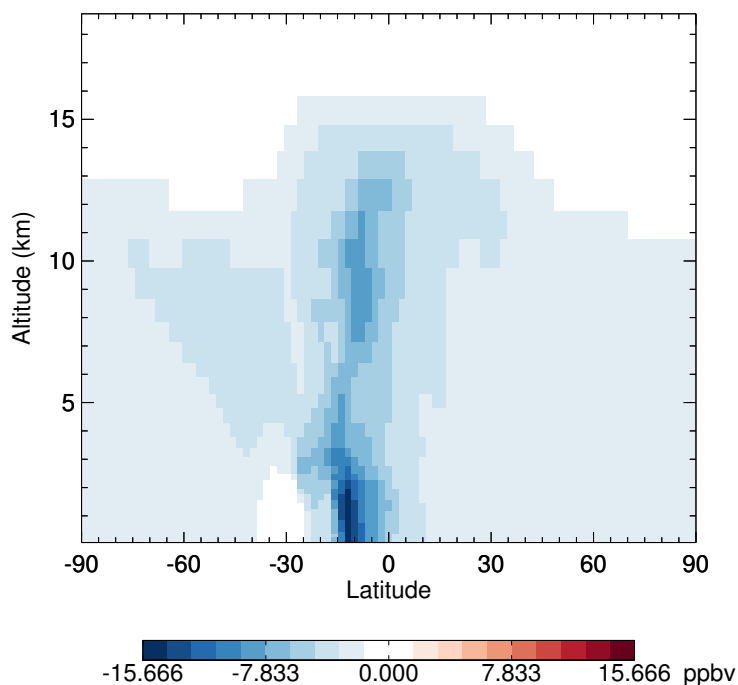

new\_tagCO - full\_chemistry  
CO - Diff along 0E for Oct

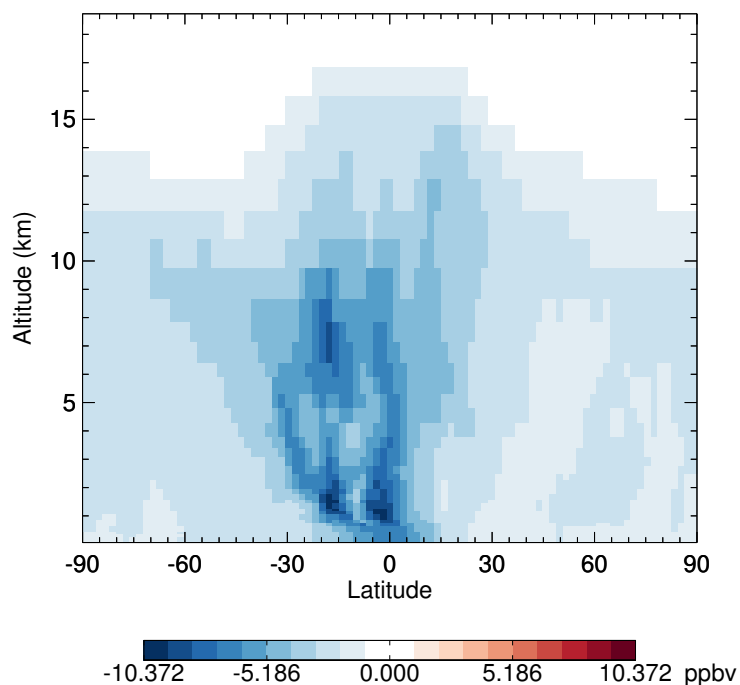

old\_tagCO - full\_chemistry  
CO - Diff along -60W for Oct

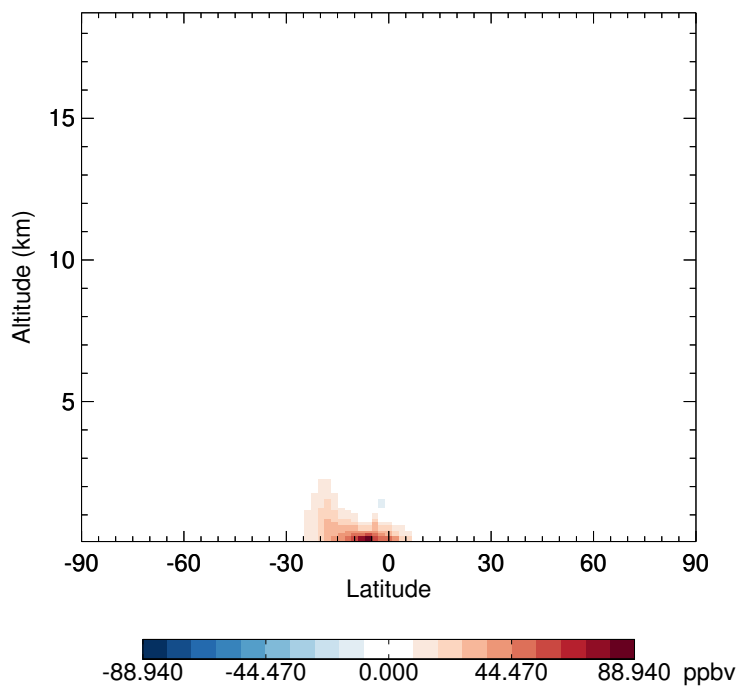

old\_tagCO - full\_chemistry  
CO - Diff along 0E for Oct

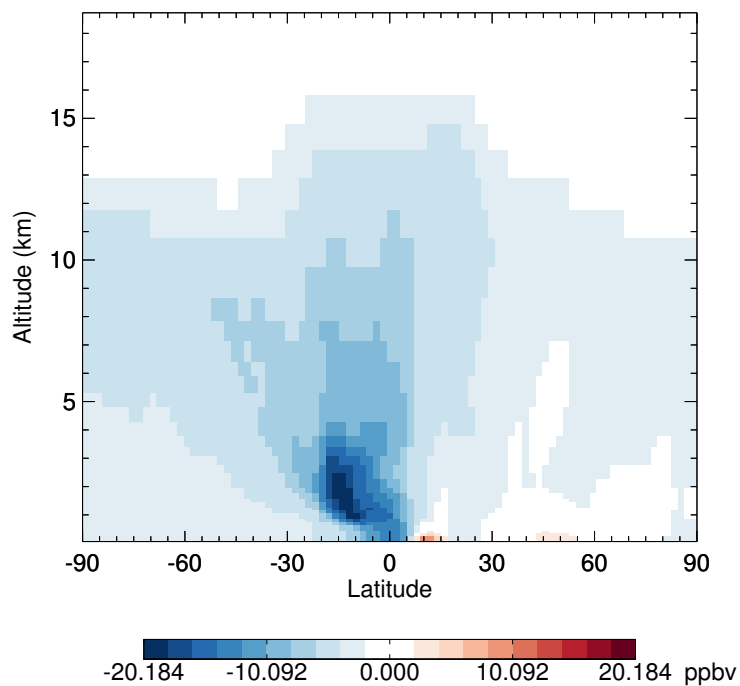

## GEOS-Chem Latitudinal Difference Profiles

new\_tagCO - full\_chemistry  
CO - Diff along -60W for Oct

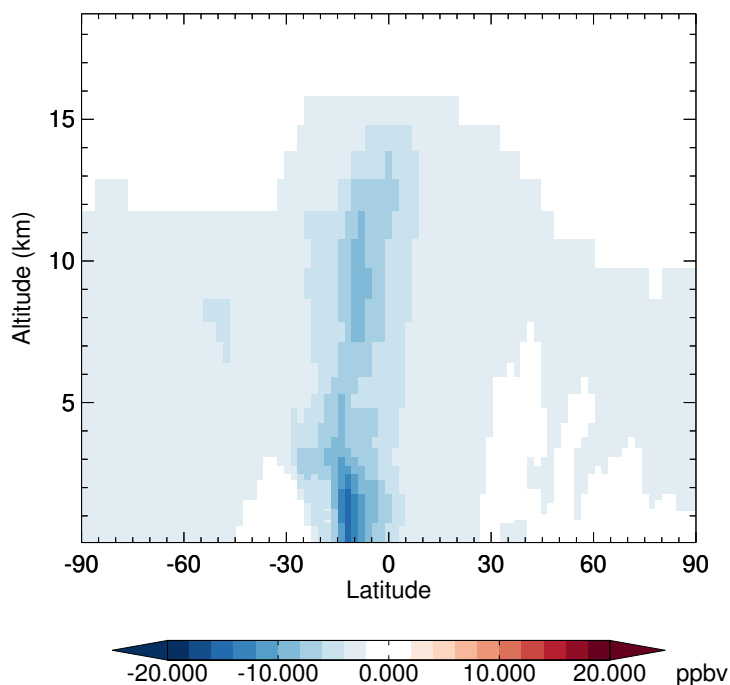

new\_tagCO - full\_chemistry  
CO - Diff along 0E for Oct

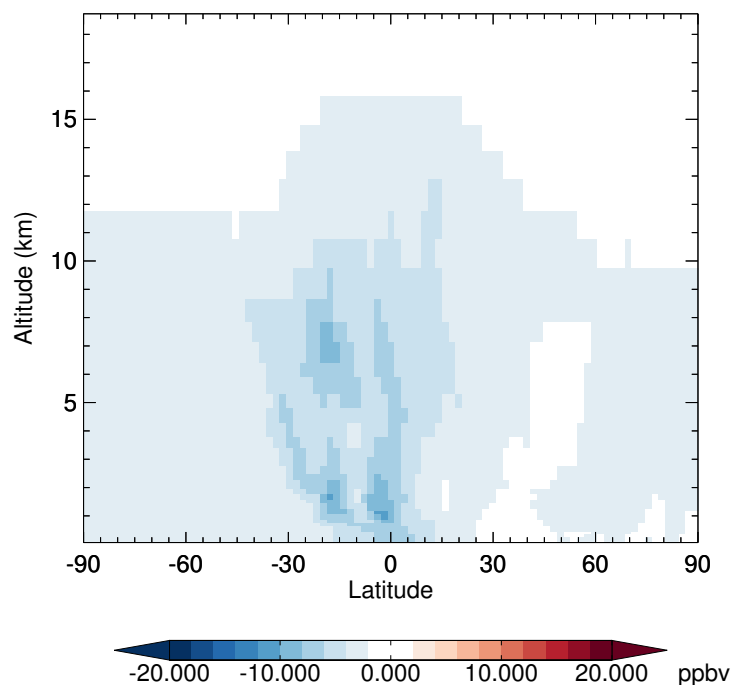

old\_tagCO - full\_chemistry  
CO - Diff along -60W for Oct

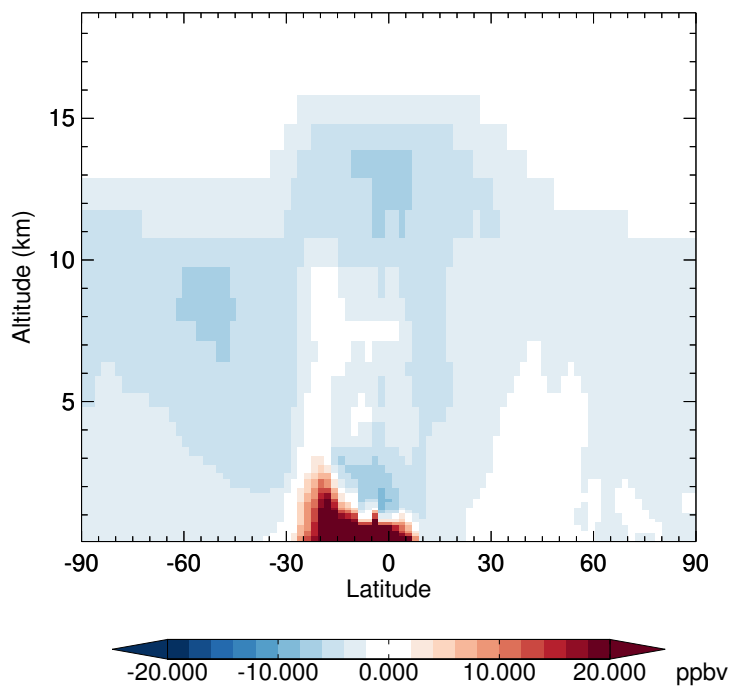

old\_tagCO - full\_chemistry  
CO - Diff along 0E for Oct

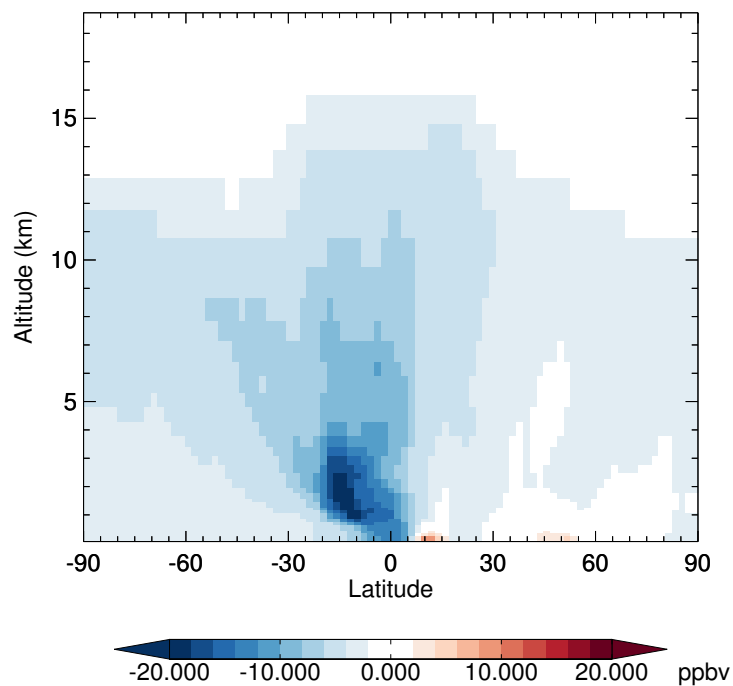

# GEOS-Chem Ratio Maps at surface and 500 hPa

new\_tagCO - full\_chemistry  
CO - Ratio @ Surface for Apr

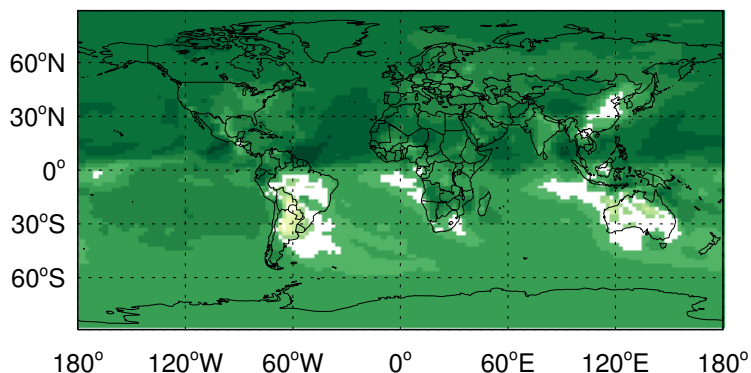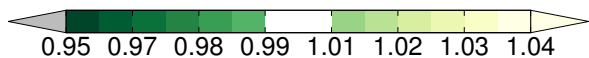

new\_tagCO - full\_chemistry  
CO - Ratio @ Surface for Apr

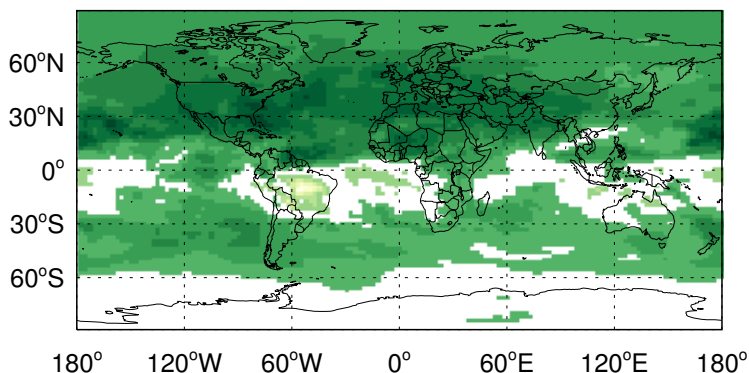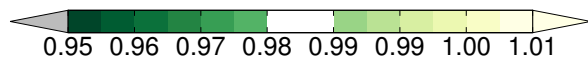

old\_tagCO - full\_chemistry  
CO - Ratio @ Surface for Apr

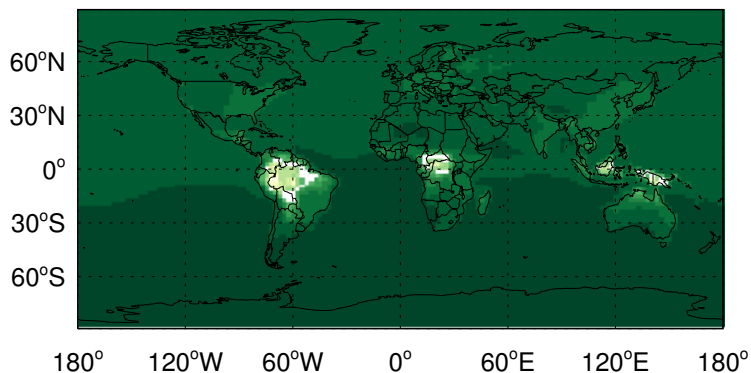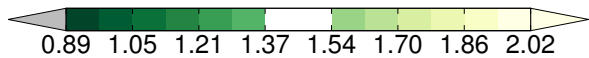

old\_tagCO - full\_chemistry  
CO - Ratio @ Surface for Apr

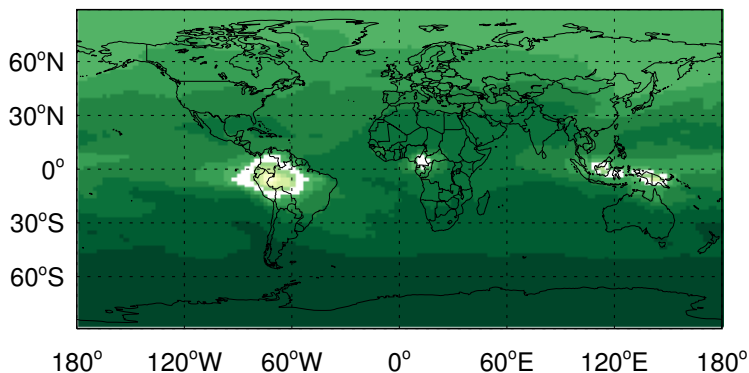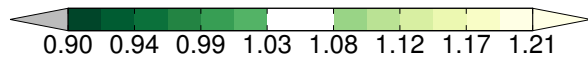

# GEOS-Chem Ratio Maps at surface and 500 hPa

new\_tagCO - full\_chemistry  
CO - Ratio @ Surface for Apr

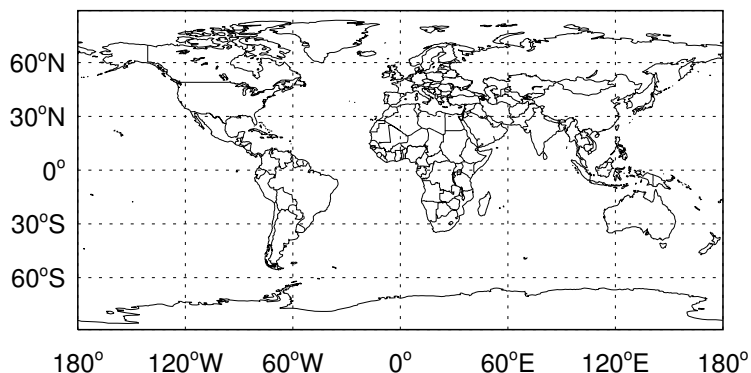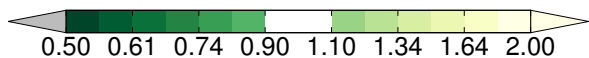

new\_tagCO - full\_chemistry  
CO - Ratio @ Surface for Apr

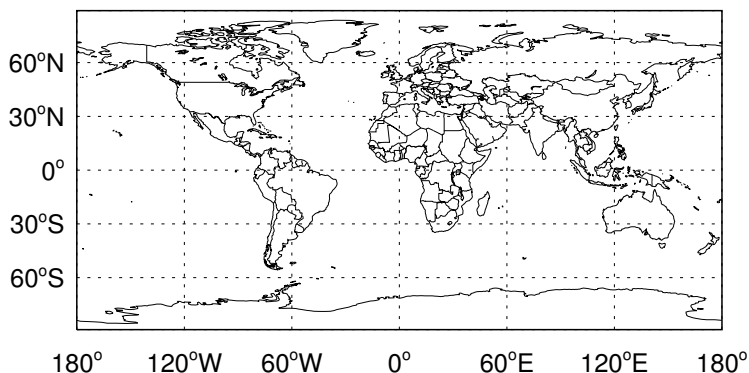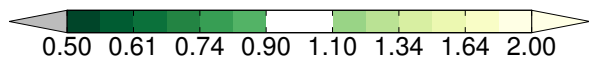

old\_tagCO - full\_chemistry  
CO - Ratio @ Surface for Apr

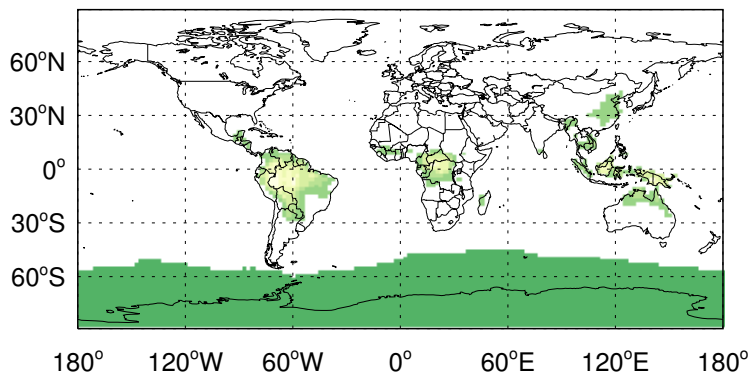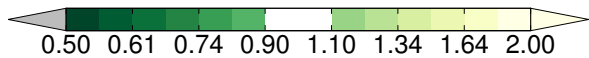

old\_tagCO - full\_chemistry  
CO - Ratio @ Surface for Apr

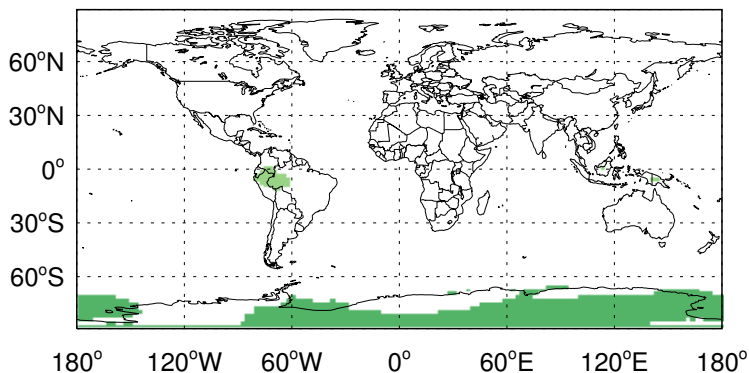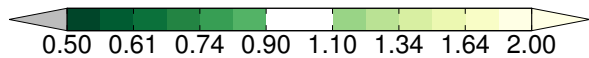

# GEOS-Chem Ratio Maps at surface and 500 hPa

new\_tagCO - full\_chemistry  
CO - Ratio @ Surface for Jan

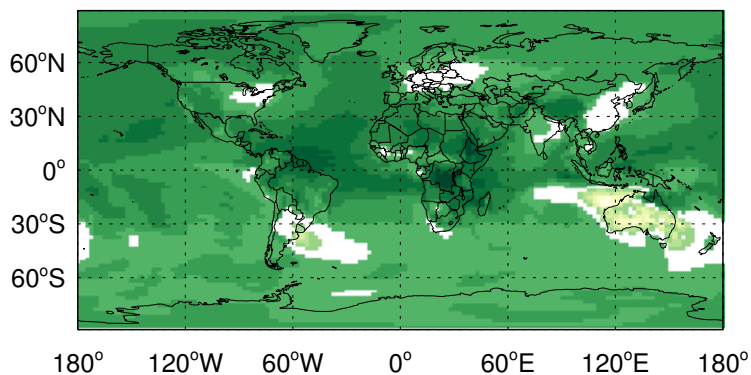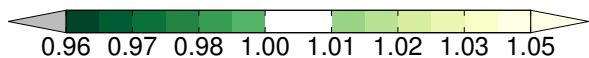

new\_tagCO - full\_chemistry  
CO - Ratio @ Surface for Jan

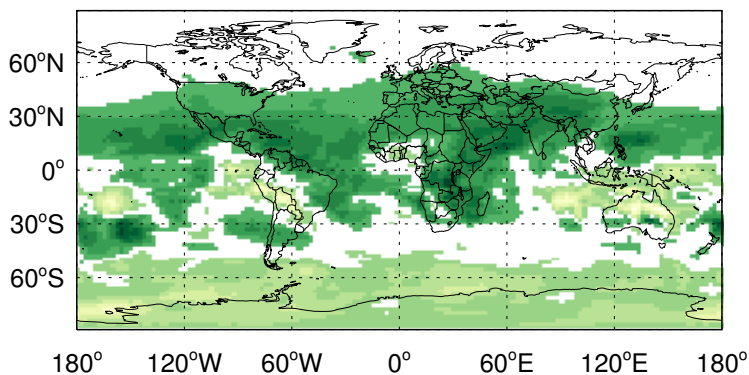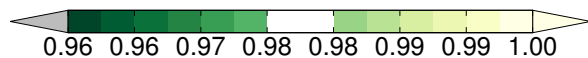

old\_tagCO - full\_chemistry  
CO - Ratio @ Surface for Jan

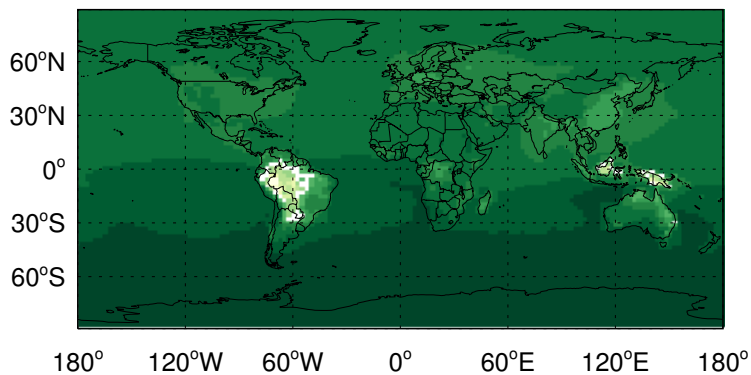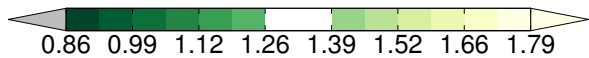

old\_tagCO - full\_chemistry  
CO - Ratio @ Surface for Jan

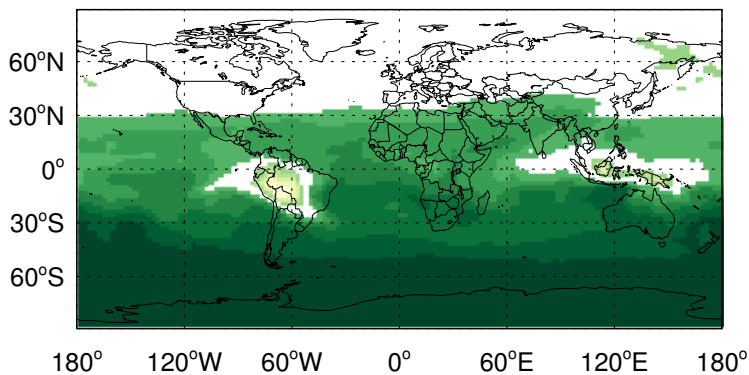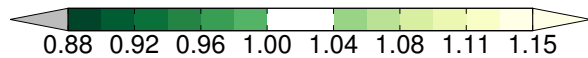

# GEOS-Chem Ratio Maps at surface and 500 hPa

new\_tagCO - full\_chemistry  
CO - Ratio @ Surface for Jan

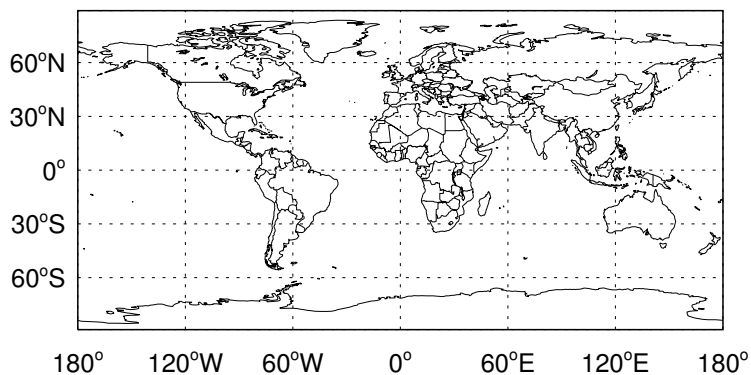

new\_tagCO - full\_chemistry  
CO - Ratio @ Surface for Jan

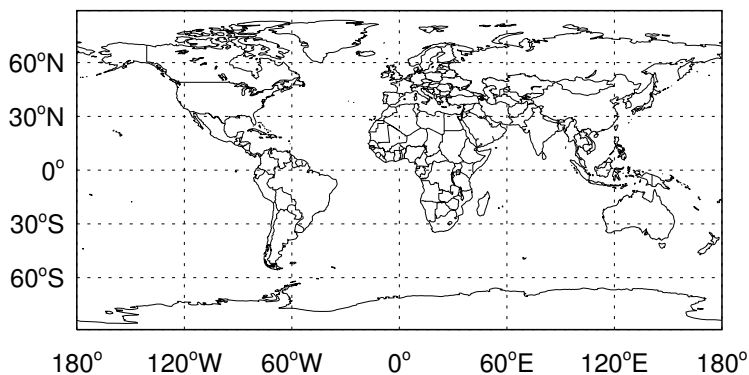

old\_tagCO - full\_chemistry  
CO - Ratio @ Surface for Jan

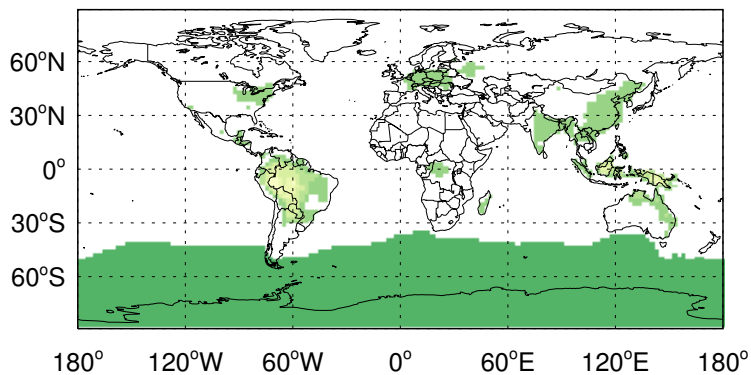

old\_tagCO - full\_chemistry  
CO - Ratio @ Surface for Jan

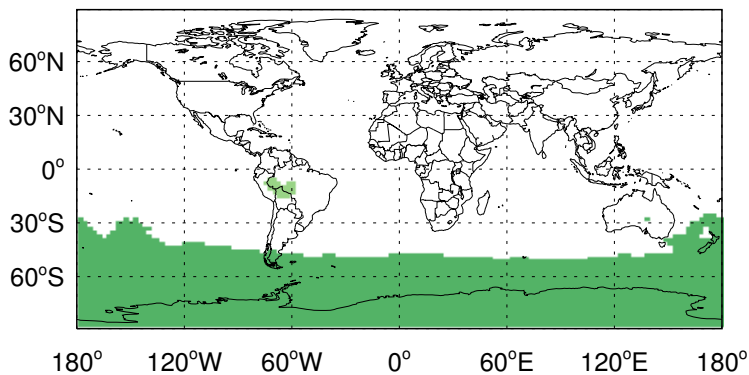

# GEOS-Chem Ratio Maps at surface and 500 hPa

new\_tagCO - full\_chemistry  
CO - Ratio @ Surface for Jul

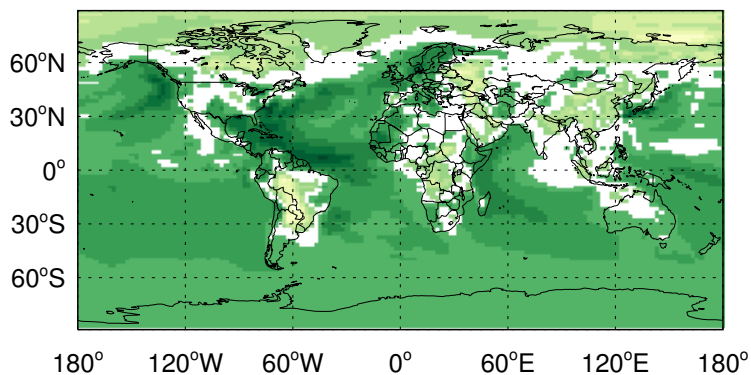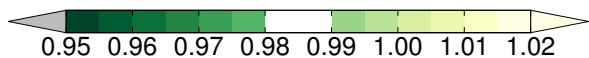

new\_tagCO - full\_chemistry  
CO - Ratio @ Surface for Jul

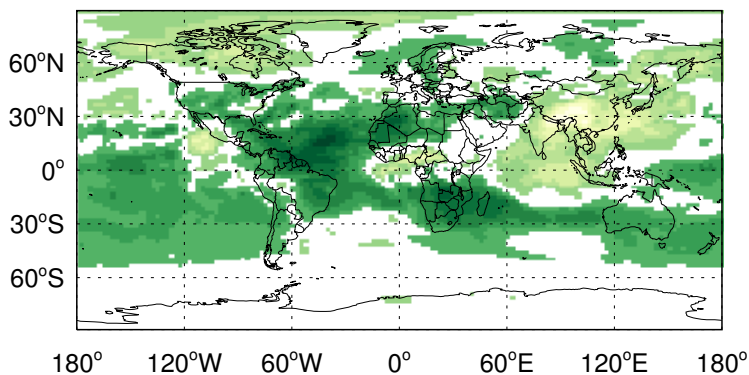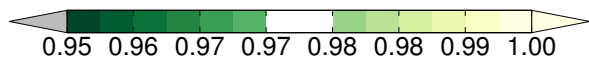

old\_tagCO - full\_chemistry  
CO - Ratio @ Surface for Jul

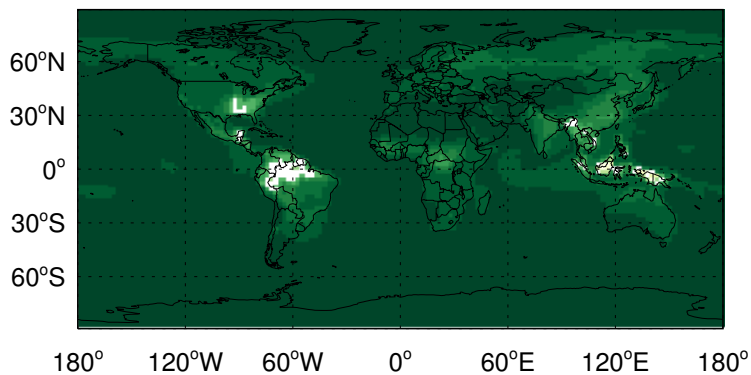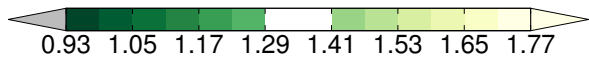

old\_tagCO - full\_chemistry  
CO - Ratio @ Surface for Jul

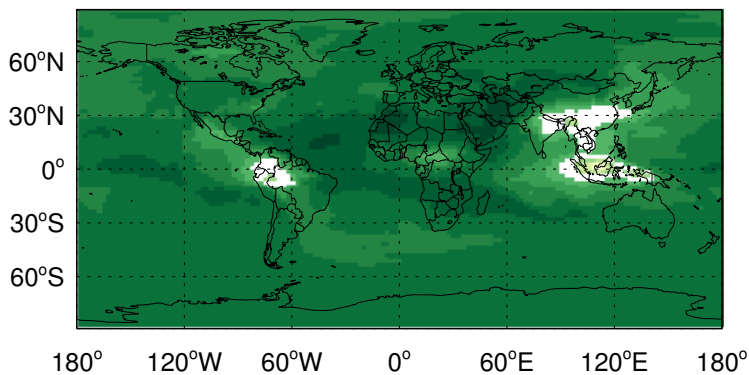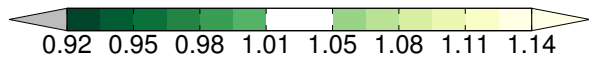

# GEOS-Chem Ratio Maps at surface and 500 hPa

new\_tagCO - full\_chemistry  
CO - Ratio @ Surface for Jul



new\_tagCO - full\_chemistry  
CO - Ratio @ Surface for Jul



old\_tagCO - full\_chemistry  
CO - Ratio @ Surface for Jul

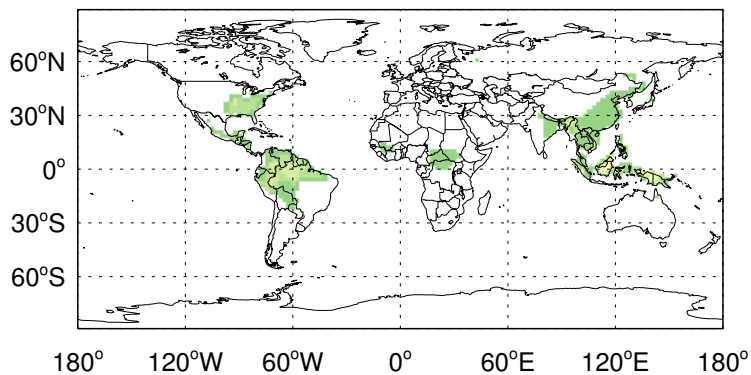

old\_tagCO - full\_chemistry  
CO - Ratio @ Surface for Jul

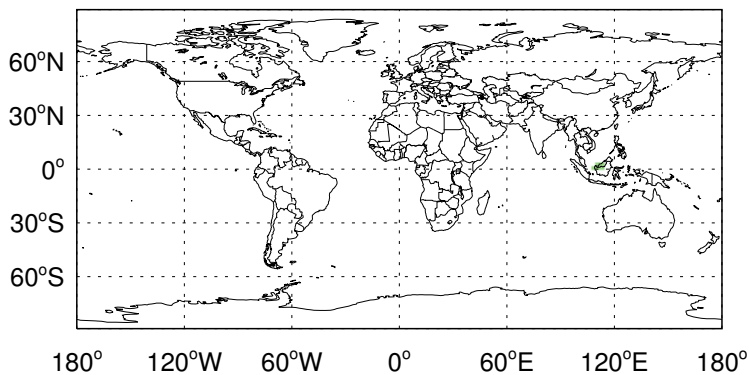

# GEOS-Chem Ratio Maps at surface and 500 hPa

new\_tagCO - full\_chemistry  
CO - Ratio @ Surface for Oct

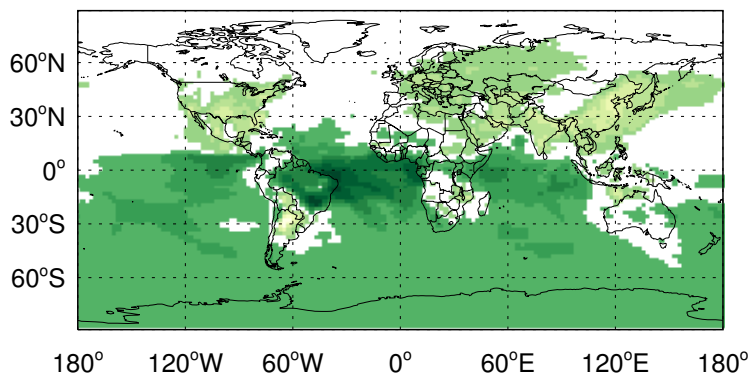

new\_tagCO - full\_chemistry  
CO - Ratio @ Surface for Oct

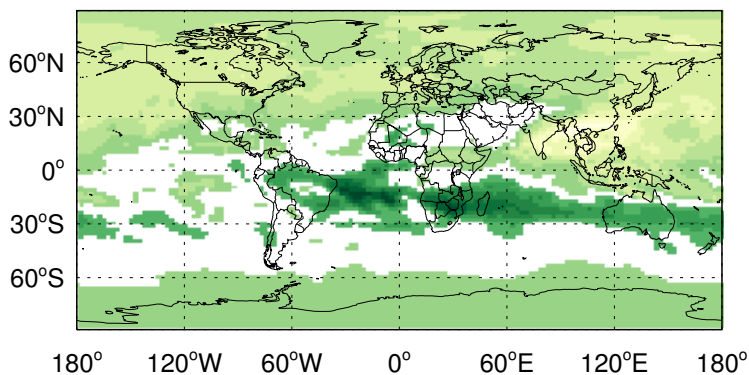

old\_tagCO - full\_chemistry  
CO - Ratio @ Surface for Oct

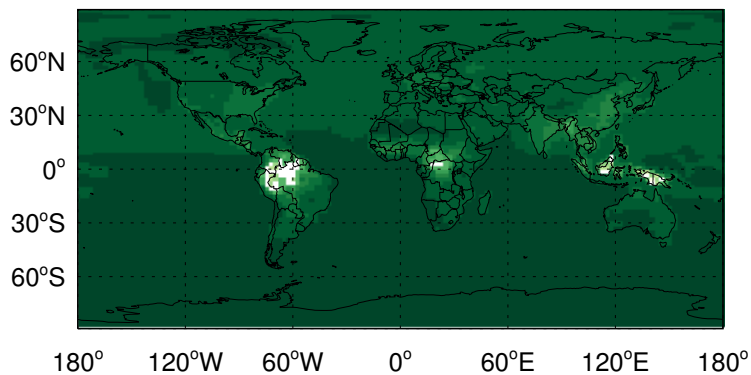

old\_tagCO - full\_chemistry  
CO - Ratio @ Surface for Oct

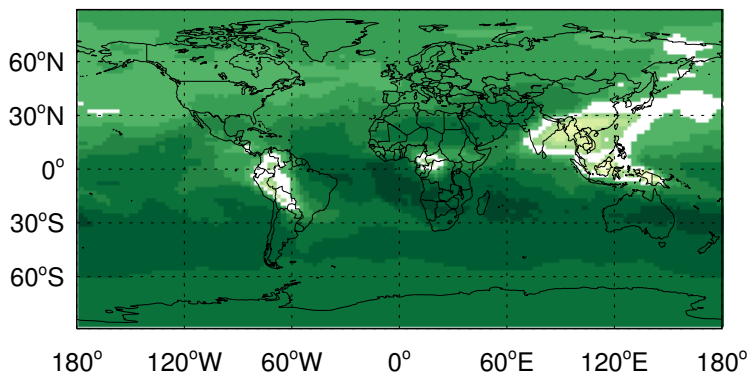

# GEOS-Chem Ratio Maps at surface and 500 hPa

new\_tagCO - full\_chemistry  
CO - Ratio @ Surface for Oct



new\_tagCO - full\_chemistry  
CO - Ratio @ Surface for Oct



old\_tagCO - full\_chemistry  
CO - Ratio @ Surface for Oct

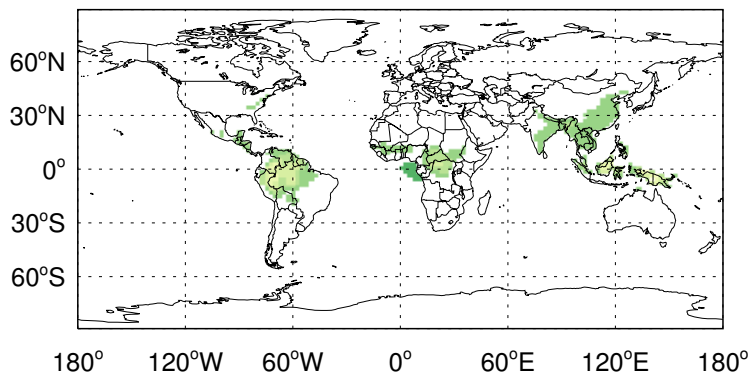

old\_tagCO - full\_chemistry  
CO - Ratio @ Surface for Oct

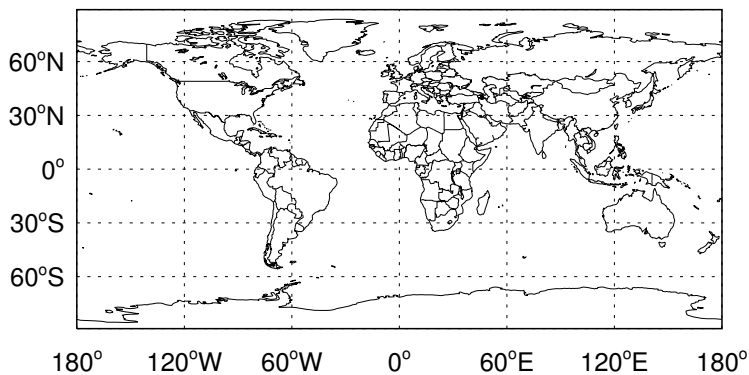

Supplement: Supplementary file 1 [file gmd-10-4129-2017-supplement.zip › 2010_benchmark.pdf]
