# Supplementary material for: Improved method for linear carbon monoxide simulation and source attribution in atmospheric chemistry models illustrated using GEOS-Chem v9
Source: Copernicus journal article supplement (doi:10.5194/gmd-10-4129-2017), 2017-11-15
Supplement: Supplementary file 1 [file gmd-10-4129-2017-supplement.zip]

Archive with 5 entries (5 files):
- 2010_benchmark.pdf
- 2009_benchmark.pdf
- 00_Fisher_TaggedCO_forGMD_SUPP_v4.pdf
- gmd-10-4129-2017-supplement-title-page.pdf
- 2011_benchmark.pdf
