# Supplementary material for: Improved method for linear carbon monoxide simulation and source attribution in atmospheric chemistry models illustrated using GEOS-Chem v9
Source: Copernicus journal article supplement (doi:10.5194/gmd-10-4129-2017), 2017-11-15
Supplement: Supplementary file 1 [file gmd-10-4129-2017-supplement.zip › gmd-10-4129-2017-supplement-title-page.pdf]

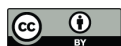

## *Supplement of*

# **Improved method for linear carbon monoxide simulation and source attribution in atmospheric chemistry models illustrated using GEOS-Chem v9**

**J. A. Fisher et al.**

*Correspondence to:* Jenny A. Fisher ([jennyf@uow.edu.au](mailto:jennyf@uow.edu.au))

- [gmd-10-4129-2017-supplement-title-page.pdf](#)
- [00\\_Fisher\\_TaggedCO\\_forGMD\\_SUPP\\_v4.pdf](#)
- [2009\\_benchmark.pdf](#)
- [2010\\_benchmark.pdf](#)
- [2011\\_benchmark.pdf](#)

The copyright of individual parts of the supplement might differ from the CC BY 3.0 License.
